# Supplementary material for: CCR1 and CCR5 mediate cancer-induced myelopoiesis and differentiation of myeloid cells in the tumor
Source: J Immunother Cancer. 2022 Jan 21;10(1):e003131. doi: 10.1136/jitc-2021-003131 (PMC8785210; doi:10.1136/jitc-2021-003131)
Supplement: Supplementary data [file jitc-2021-003131supp002.xlsx]

## Sheet: Supplemental Table 2
Supplemental table 2: fold change and FDR (% qvalue) for all gene IDs in the various comparisons as determined by SAM.
ProbeID	Symbol	Description	4T1 vehicle vs RPMI		4T1+antagonists vs 4T1 vehicle		4T1+antagonists vs RPMI
			FoldChange	qvalue (%)	FoldChange	qvalue (%)	FoldChange	qvalue (%)
100009600_at	Zglp1	zinc finger, GATA-like protein 1	1.05887	42.041	-1.04403	35.7106	1.01421	31.9769
100009609_at	Vmn2r65	vomeronasal 2, receptor 65	-1.01714	60.7357	1.06759	26.6761	1.0496	27.3308
100009614_at	Gm10024	predicted gene 10024	1.00201	54.2028	-1.00082	43.2839	1.00119	31.9769
100009664_at	F630206G17Rik	RIKEN cDNA F630206G17 gene	-1.0644	54.2028	1.00011	42.8252	-1.06428	27.3308
100012_at	Oog3	oogenesin 3	-1.06843	54.2028	-1.24385	0.803127	-1.32897	0.111227
100017_at	Ldlrap1	low density lipoprotein receptor adaptor protein 1	-1.56582	0.104308	1.17165	2.18295	-1.33643	0.111227
100019_at	Mdn1	midasin AAA ATPase 1	1.83572	0	-1.34367	0.0451547	1.3662	0
100033459_at	Ifi208	interferon activated gene 208	1.02505	54.2028	-1.51285	0.130668	-1.47588	1.13219
100034251_at	Wfdc17	WAP four-disulfide core domain 17	4.8685	0	1.38808	0.308961	6.75785	0
100034675_at	Gm11335	predicted gene 11335	-1.01242	60.7357	-1.05749	35.7106	-1.07063	27.3308
100034728_at	Rps12-ps4	ribosomal protein S12, pseudogene 4	1.57625	0.104308	-1.12213	14.3309	1.40469	0.111227
100034729_at	Gm15114	predicted gene 15114	-1.0392	60.7357	-1.39042	5.99507	-1.44493	7.52666
100034739_at	Gm17762	predicted gene, 17762	1.23787	2.9847	1.05938	26.6761	1.31137	0.482549
100034748_at	A930017K11Rik		-1.13357	42.041	1.16523	14.3309	1.02793	31.9769
100036518_at	Vmn1r223	vomeronasal 1 receptor 223	1.12995	25.0856	1.19571	5.99507	1.3511	2.97913
100036520_at	Gata5os	GATA binding protein 5, opposite strand	-1.0433	60.0813	-1.10873	26.6761	-1.15674	16.9924
100036521_at	Umad1	UMAP1-MVP12 associated (UMA) domain containing 1	-1.21944	2.9847	-1.76731	0.0201689	-2.15513	0
100036523_at	Gm16982	predicted gene, 16982	-1.13497	25.0856	1.25833	0.803127	1.10869	2.97913
100036537_at	Gm11149	predicted gene 11149	-1.16321	25.0856	1.05831	26.6761	-1.09912	16.9924
100036768_at	Gm11696	predicted gene 11696	-1.05234	57.704	-1.11074	14.3309	-1.16888	2.97913
100037258_at	Dnajc3	DnaJ heat shock protein family (Hsp40) member C3	1.16917	6.16911	-1.25967	0.803127	-1.0774	27.3308
100037260_at	9430060I03Rik	RIKEN cDNA 9430060I03 gene	-1.04076	60.7357	1.10713	26.6761	1.06377	16.9924
100037262_at	Gm12359	predicted gene 12359	-1.46747	2.9847	1.17496	14.3309	-1.24895	1.13219
100037278_at	Fam129c	family with sequence similarity 129, member C	-2.24466	0	-7.22063	0	-16.2079	0
100037282_at	Rsph3b	radial spoke 3B homolog (Chlamydomonas)	-1.05618	60.0813	1.07477	35.7106	1.01761	31.9769
100037396_at	D030047H15Rik	RIKEN cDNA D030047H15 gene	1.02476	54.2028	1.03571	35.7106	1.06135	16.9924
100037413_at	Gm13274	predicted gene 13274	-1.20794	25.0856	1.70816	0.308961	1.41411	0.224685
100038347_at	Fam174b	family with sequence similarity 174, member B	-1.18521	6.16911	1.19312	2.18295	1.00667	31.9769
100038353_at	Gm10532	predicted gene 10532	-1.16475	25.0856	1.16281	5.99507	-1.00167	36.5645
100038356_at	Gm15612	predicted gene 15612	-1.07265	57.704	1.04734	35.7106	-1.02416	36.071
100038358_at	Gm10857	predicted gene 10857	-1.15532	25.0856	1.5263	0.308961	1.3211	0.482549
100038363_at	F630028O10Rik	RIKEN cDNA F630028O10 gene	-1.39689	0.192905	1.90141	0	1.36118	0.0148586
100038371_at	Zfp389	zinc finger protein 389	-1.10589	42.041	1.00972	41.0315	-1.09524	27.3308
100038374_at	Gm10714	predicted gene 10714	1.05598	42.041	1.34518	0.308961	1.42048	0.111227
100038378_at	Gm10433	predicted gene 10433	1.08072	42.041	-1.1769	5.99507	-1.089	16.9924
100038382_at	Gm10648	predicted gene 10648	1.0379	54.2028	1.19986	5.99507	1.24533	1.13219
100038384_at	Gm10610	predicted gene 10610	1.069	42.041	1.29613	2.18295	1.38557	0.482549
100038388_at	Gm10614	predicted gene 10614	-1.21625	12.3562	1.31411	2.18295	1.08046	7.52666
100038392_at	Gm10785	predicted gene 10785	1.28042	6.16911	1.10357	26.6761	1.41303	0.0148586
100038394_at	Gm10512	predicted gene 10512	-1.07464	57.704	1.01245	41.0315	-1.06143	27.3308
100038410_at	Gm10536	predicted gene 10536	-1.02492	60.7357	1.21389	2.18295	1.18437	2.97913
100038417_at	Spink13	serine peptidase inhibitor, Kazal type 13	1.05298	42.041	1.03434	35.7106	1.08913	7.52666
100038429_at	Gm10505	predicted gene 10505	1.22909	12.3562	-1.0372	35.7106	1.18501	7.52666
100038437_at	Gm10706	predicted gene 10706	-1.21158	12.3562	1.2914	0.803127	1.06588	16.9924
100038439_at	Gm10556	predicted gene 10556	1.00248	54.2028	1.20167	5.99507	1.20465	2.97913
100038453_at	Gm12522	predicted gene 12522	1.05324	42.041	1.00909	41.0315	1.06282	16.9924
100038454_at	Platr8	pluripotency associated transcript 8	-1.00365	60.7357	1.07806	26.6761	1.07414	16.9924
100038460_at	Gm10677	predicted gene 10677	1.06185	42.041	-1.26959	0.803127	-1.19564	2.97913
100038464_at	Gm15441	predicted gene 15441	-1.32716	2.9847	1.25767	5.99507	-1.05525	27.3308
100038467_at	A630072L19Rik	RIKEN cDNA A630072L19 gene	-1.3128	1.50007	1.66064	0.0451547	1.26497	0.482549
100038468_at	Gm10684	predicted gene 10684	-1.14939	25.0856	1.08774	26.6761	-1.05668	34.5868
100038479_at	Gm10787	predicted gene 10787	-1.03596	60.0813	1.51277	0.0451547	1.46026	0.111227
100038481_at	Gm10510	predicted gene 10510	1.19261	12.3562	1.2055	5.99507	1.43769	0.482549
100038489_at	Apela	apelin receptor early endogenous ligand	-1.0993	54.2028	1.02986	35.7106	-1.06742	27.3308
100038493_at	Gm13582	predicted gene 13582	-1.04471	60.0813	1.85784	0.0201689	1.77833	0.0148586
100038494_at	Gm10782	predicted gene 10782	-1.00814	60.7357	1.25884	2.18295	1.24868	0.224685
100038504_at	Gm10369	predicted gene 10369	1.05882	42.041	1.19092	5.99507	1.26097	7.52666
100038513_at	Gm14149	predicted gene 14149	1.16994	25.0856	1.07146	35.7106	1.25354	7.52666
100038514_at	Gm11837	predicted gene 11837	-1.08411	42.041	-1.03106	35.7106	-1.11778	2.97913
100038516_at	Gm10640	predicted gene 10640	-1.14636	25.0856	1.34064	0.803127	1.16947	2.97913
100038522_at	Dnmt3aos	DNA methyltransferase 3A, opposite strand	-2.19875	0	1.36134	0.130668	-1.61514	0.0148586
100038525_at	Gm10804	predicted gene 10804	-1.16375	12.3562	1.27438	0.803127	1.09506	16.9924
100038526_at	Gm10560	predicted gene 10560	1.08799	42.041	-1.14556	26.6761	-1.05291	36.071
100038528_at	Gm10851	predicted gene 10851	1.21037	6.16911	-1.4293	0.130668	-1.18088	2.97913
100038538_at	Gm10767	predicted gene 10767	1.04778	54.2028	-1.41969	0.803127	-1.35494	0.224685
100038545_at	Gm10745	predicted gene 10745	-1.10156	42.041	1.06082	26.6761	-1.0384	31.9769
100038554_at	Gm15348	predicted gene 15348	-1.06309	57.704	1.28055	2.18295	1.20456	2.97913
100038555_at	Gm10578	predicted gene 10578	-1.06675	54.2028	1.18011	2.18295	1.10627	7.52666
100038556_at	Gm10445	predicted gene 10445	1.18887	12.3562	1.09305	26.6761	1.29949	1.13219
100038560_at	Gm10687	predicted gene 10687	-1.15361	42.041	1.18214	14.3309	1.02473	31.9769
100038566_at	Gm10658	predicted gene 10658	1.59232	0.301356	-1.43665	0.308961	1.10836	7.52666
100038570_at	Prcd	photoreceptor disc component	-1.03699	60.7357	1.07274	26.6761	1.03448	27.3308
100038571_at	Gm12863	predicted gene 12863	-1.01024	60.7357	2.32437	0	2.3008	0
100038574_at	Gm10415	predicted gene 10415	1.02212	54.2028	1.0434	26.6761	1.06648	16.9924
100038575_at	Gm10635	predicted gene 10635	-1.00429	60.7357	1.04182	26.6761	1.03737	27.3308
100038577_at	Gm10790	predicted gene 10790	1.01869	54.2028	1.01598	41.0315	1.03497	27.3308
100038582_at	Gm10824	predicted gene 10824	1.02636	54.2028	1.02076	41.0315	1.04767	27.3308
100038584_at	Gm14812	predicted gene 14812	-1.11737	25.0856	1.17412	2.18295	1.05078	16.9924
100038591_at	F420014N23Rik	RIKEN cDNA F420014N23 gene	1.10285	25.0856	1.05906	26.6761	1.16798	2.97913
100038595_at	Gm16287	predicted gene 16287	-1.00686	60.7357	-1.02666	35.7106	-1.03371	31.9769
100038599_at	Gm10710	predicted gene 10710	1.05115	42.041	1.01593	41.0315	1.06789	16.9924
100038600_at	Gm11529	predicted gene 11529	1.08721	42.041	1.00444	42.8252	1.09203	7.52666
100038601_at	Gm11691	predicted gene 11691	-1.0199	60.7357	-1.10123	14.3309	-1.12314	7.52666
100038602_at	Gm10865	predicted gene 10865	-1.44814	1.50007	-1.71481	0.0201689	-2.48329	0
100038607_at	Gm10636	predicted gene 10636	1.05278	42.041	-1.06547	26.6761	-1.01205	36.5645
100038608_at	Gm10389	predicted gene 10389	1.08535	42.041	1.24846	2.18295	1.35501	1.13219
100038610_at	Gm10747	predicted gene 10747	1.04015	42.041	-1.05851	26.6761	-1.01766	36.5645
100038614_at	Gm10791	predicted gene 10791	1.0773	42.041	-1.07676	26.6761	1.0005	31.9769
100038617_at	Gm10466	predicted gene 10466	-1.03218	60.7357	1.07452	26.6761	1.04102	16.9924
100038618_at	Gm10847	predicted gene 10847	1.03792	42.041	1.06475	26.6761	1.10512	16.9924
100038623_at	Gm10823	predicted gene 10823	1.09144	25.0856	1.26798	2.18295	1.38393	1.13219
100038627_at	F630042J09Rik	RIKEN cDNA F630042J09 gene	-1.13103	25.0856	1.23295	0.803127	1.09011	7.52666
100038628_at	Gm10768	predicted gene 10768	-1.0142	60.7357	1.18895	0.803127	1.1723	0.482549
100038636_at	B230344G16Rik	RIKEN cDNA B230344G16 gene	1.08056	42.041	1.24336	5.99507	1.34352	2.97913
100038638_at	Fmr1os	fragile X mental retardation syndrome 1, opposite strand	1.04845	54.2028	1.09585	26.6761	1.14894	7.52666
100038653_at	Gm10538	predicted gene 10538	1.09633	42.041	1.40439	0.803127	1.53968	0.482549
100038654_at	Gm10371	predicted gene 10371	1.09024	25.0856	-1.08559	14.3309	1.00429	31.9769
100038657_at	7420461P10Rik	RIKEN cDNA 7420461P10 gene	1.09856	25.0856	-1.11961	5.99507	-1.01916	36.5645
100038659_at	Mirt2	myocardial infraction associated transcript 2	-2.01929	0	4.89403	0	2.42363	0
100038666_at	Gm12298	predicted gene 12298	1.00141	54.2028	1.51024	2.18295	1.51237	0.482549
100038671_at	Gm10860	predicted gene 10860	1.196	25.0856	1.12609	26.6761	1.34681	0.482549
100038689_at	Gm10421	predicted gene 10421	1.09926	25.0856	-1.04223	35.7106	1.05471	16.9924
100038693_at	Tmem51os1	Tmem51 opposite strand 1	1.12059	42.041	1.16565	14.3309	1.30621	0.224685
100038699_at	Gm10754	predicted gene 10754	1.10752	25.0856	1.02128	41.0315	1.13109	7.52666
100038700_at	Gm14488	predicted gene 14488	1.14022	25.0856	1.05223	35.7106	1.19977	7.52666
100038706_at	Gm10637	predicted gene 10637	1.01233	54.2028	1	42.8252	1.01233	31.9769
100038708_at	Gm10855	predicted gene 10855	1.11464	25.0856	-1.04644	35.7106	1.06518	16.9924
100038709_at	Gm10789	predicted gene 10789	-1.07853	54.2028	1.16848	5.99507	1.0834	16.9924
100038712_at	Gm10516	predicted gene 10516	1.07538	42.041	1.12888	14.3309	1.21397	2.97913
100038713_at	Gm10432	predicted gene 10432	1.08021	25.0856	-1.16199	5.99507	-1.07571	16.9924
100038714_at	Gm15401	predicted gene 15401	1.04215	42.041	1.01881	41.0315	1.06175	16.9924
100038718_at	Gm10494	predicted gene 10494	1.00896	54.2028	1.02512	35.7106	1.03431	27.3308
100038725_at	Cep85l	centrosomal protein 85-like	-1.17599	12.3562	-1.28139	2.18295	-1.50689	0.111227
100038728_at	Gm10373	predicted gene 10373	1.01808	54.2028	-1.08897	26.6761	-1.06963	27.3308
100038732_at	Gm11681	predicted gene 11681	-1.01564	60.7357	1.45484	0.0451547	1.43244	0
100038734_at	Gm10845	predicted gene 10845	-1.05293	57.704	1.52519	0.803127	1.44852	1.13219
100038735_at	Gm10384	predicted gene 10384	-1.44756	0.192905	1.17854	2.18295	-1.22826	0.482549
100038743_at	Gm13629	predicted gene 13629	-1.24684	6.16911	1.41839	0.0296712	1.13759	7.52666
100038746_at	Gm1976	predicted gene 1976	-1.13959	42.041	1.22717	5.99507	1.07685	16.9924
100038752_at	Gm10825	predicted gene 10825	-1.333	6.16911	1.06444	26.6761	-1.2523	2.97913
100038761_at	Unc45bos	unc-45 myosin chaperone B, opposite strand	1.21485	12.3562	1.07982	26.6761	1.31183	1.13219
100038854_at	BC117090	cDNA sequence BC1179090	1.28821	2.9847	1.27195	0.308961	1.63854	0.111227
100038859_at	Olfr55	olfactory receptor 55	-1.08797	54.2028	6.60101	0	6.06728	0
100038860_at	Olfr239	olfactory receptor 239	1.12369	25.0856	1.0807	26.6761	1.21437	1.13219
100038862_at	Btnl1	butyrophilin-like 1	-1.25168	12.3562	1.2017	14.3309	-1.04159	34.5868
100038882_at	Isg15	ISG15 ubiquitin-like modifier	1.77792	0.192905	-3.42628	0	-1.92713	0
100038909_at	Gm14548	predicted gene 14548	1.08472	42.041	1.37121	0.130668	1.48738	0.111227
100038912_at	Ceacam-ps1	carcinoembryonic antigen-related cell adhesion molecule pseudogene 1	-1.05819	54.2028	1.18238	5.99507	1.11736	7.52666
100038927_at	Defa30	defensin, alpha, 30	-1.05116	60.7357	1.3837	0.803127	1.31635	2.97913
100038941_at	Vmn2r121	vomeronasal 2, receptor 121	-1.00911	60.7357	-1.11473	14.3309	-1.12489	7.52666
100038948_at	Mup9	major urinary protein 9	-1.54382	12.3562	-1.14086	26.6761	-1.76129	2.97913
100038967_at	Gm1988	predicted gene 1988	1.01496	54.2028	1.27715	2.18295	1.29626	0.111227
100038982_at	Gm1995	REX1, RNA exonuclease 1 homolog pseudogene	1.08031	42.041	-1.08792	26.6761	-1.00704	36.5645
100038991_at	Gm2000	ribosomal protein L35 pseudogene	1.43354	6.16911	-1.64448	0.803127	-1.14715	2.97913
100038999_at	Gm13552	predicted gene 13552	1.74469	0.104308	-1.08171	26.6761	1.61289	0
100039019_at	Mup-ps12	major urinary protein, pseudogene 12	1.16465	25.0856	-1.15988	14.3309	1.00411	31.9769
100039042_at	Gm2016	predicted gene 2016	-1.09502	42.041	1.15009	5.99507	1.0503	16.9924
100039043_at	Gm10731	FUN14 domain containing 2 pseudogene	1.18806	25.0856	1.24936	5.99507	1.48431	1.13219
100039045_at	Gm10471	predicted gene 10471	1.08532	42.041	1.09782	35.7106	1.19148	16.9924
100039054_at	Mup12	major urinary protein 12	1.4461	2.9847	-1.58226	0.803127	-1.09416	27.3308
100039055_at	Gm16404	predicted gene 16404	1.04604	54.2028	-1.13403	5.99507	-1.08411	34.5868
100039062_at	Gm2027	nuclear assembly factor 1 homolog pseudogene	1.2447	6.16911	1.00591	42.8252	1.25205	1.13219
100039076_at	Gm2035	eukaryotic translation initiation factor 1A-like 2 pseudogene	-1.11944	54.2028	1.34913	2.18295	1.20519	7.52666
100039086_at	Gm15032	predicted gene 15032	1.00187	54.2028	-1.104	35.7106	-1.10193	31.9769
100039089_at	Mup13	major urinary protein 13	1.35465	2.9847	1.15723	26.6761	1.56764	1.13219
100039100_at	Gm2046	predicted gene 2046	1.48889	0.301356	2.80458	0	4.1757	0
100039123_at	Gm14295	predicted gene 14295	1.13538	25.0856	-1.05494	35.7106	1.07625	16.9924
100039138_at	Gm2061	predicted gene 2061	1.21186	6.16911	-1.29819	0.803127	-1.07124	27.3308
100039139_at	Ccdc152	coiled-coil domain containing 152	1.06235	42.041	-1.06779	26.6761	-1.00512	36.5645
100039148_at	Gm12128	predicted gene 12128	1.04935	42.041	1.48134	0.308961	1.55445	0.0469889
100039162_at	Gm2075	predicted pseudogene 2075	-1.1779	25.0856	1.26375	5.99507	1.07288	27.3308
100039176_at	Gm13580	predicted gene 13580	-1.08466	42.041	1.20884	5.99507	1.11449	7.52666
100039184_at	Gm13861	predicted gene 13861	1.15352	12.3562	-1.14524	5.99507	1.00722	31.9769
100039210_at	Gm2102	predicted gene 2102	1.07446	42.041	-1.23238	2.18295	-1.14697	7.52666
100039211_at	Gm10649	predicted gene 10649	1.04819	42.041	-1.02947	41.0315	1.01818	31.9769
100039222_at	Gm2109	predicted gene 2109	1.02852	54.2028	1.08363	14.3309	1.11454	7.52666
100039229_at	Gm10358	glyceraldehyde-3-phosphate dehydrogenase pseudogene	1.2044	25.0856	1.3074	14.3309	1.57464	1.13219
100039239_at	Gm2115	predicted gene 2115	1.02181	54.2028	1.15887	14.3309	1.18415	1.13219
100039258_at	Gm10290	glyceraldehyde-3-phosphate dehydrogenase pseudogene	-1.01612	60.7357	-1.15001	2.18295	-1.16854	2.97913
100039269_at	Gm2128	predicted gene 2128	1.0567	42.041	1.14356	5.99507	1.2084	1.13219
100039281_at	Gm10250	ATP synthase, H+ transporting, mitochondrial F0 complex, subunit d pseudogene	1.1264	12.3562	-1.71448	0	-1.52209	0
100039315_at	Gm10436	predicted gene 10436	1.40566	0.748121	-1.60115	0.0296712	-1.13908	7.52666
100039316_at	Gm9843	predicted gene 9843	-1.10172	42.041	1.14189	5.99507	1.03646	27.3308
100039319_at	Gm14920	predicted pseudogene 14920	-1.42098	0.301356	-1.29283	0.803127	-1.83709	0
100039343_at	Gm9797	translocase of inner mitochondrial membrane 8 homolog a1 pseudogene	3.56418	0	-1.27419	5.99507	2.79722	0
100039348_at	Gm2176	glucosamine-6-phosphate deaminase 1 pseudogene	1.06173	42.041	1.06068	26.6761	1.12616	7.52666
100039350_at	Gm16500	predicted gene 16500	1.06455	42.041	1.06806	26.6761	1.137	7.52666
100039353_at	Gm2178	ribosomal protein L34 pseudogene	-1.21647	6.16911	1.12959	5.99507	-1.07691	27.3308
100039436_at	Mageb16-ps1	melanoma antigen family B, 16, pseudogene 1	1.33333	12.3562	-1.18589	14.3309	1.12433	7.52666
100039440_at	B230206L02Rik	RIKEN cDNA B230206L02 gene	1.22234	6.16911	-1.06486	35.7106	1.1479	7.52666
100039446_at	Gm2240	predicted gene 2240	1.07806	42.041	1.37768	5.99507	1.48522	0.482549
100039478_at	Gm11810	predicted gene 11810	1.07642	25.0856	-1.10607	5.99507	-1.02754	34.5868
100039495_at	Gm15706	predicted gene 15706	-1.10361	25.0856	-1.1049	14.3309	-1.21937	1.13219
100039525_at	Rps11-ps4	ribosomal protein S11, pseudogene 4	1.12921	12.3562	-1.22595	0.803127	-1.08567	16.9924
100039532_at	Gm10029	predicted pseudogene 10029	1.44881	0.748121	-1.57761	0.130668	-1.0889	27.3308
100039542_at	Tbx3os1	T-box 3, opposite strand 1	1.06633	42.041	1.05621	26.6761	1.12627	7.52666
100039551_at	Tgif2lx2	TGFB-induced factor homeobox 2-like, X-linked 2	1.11351	25.0856	-1.17404	2.18295	-1.05436	31.9769
100039571_at	Gm10335	ribosomal protein L23A pseudogene	-1.21356	12.3562	1.42408	0.308961	1.17347	0.482549
100039596_at	Tcf24	transcription factor 24	-1.24014	2.9847	1.25398	0.803127	1.01116	31.9769
100039623_at	Gm15429	anterior pharynx defective 1a homolog pseudogene	1.38109	0.748121	1.07358	14.3309	1.48271	0.0148586
100039624_at	Gm12166	SFT2 domain containing 1 pseudogene	1.57275	2.9847	-1.59525	2.18295	-1.01431	36.5645
100039636_at	Atp6v0c-ps2	ATPase, H+ transporting, lysosomal V0 subunit C, pseudogene 2	1.39648	0.301356	1.0766	26.6761	1.50344	0.111227
100039641_at	E330012B07Rik	RIKEN cDNA E330012B07 gene	1.35776	0.748121	-1.28165	0.308961	1.05938	16.9924
100039672_at	Msmp	microseminoprotein, prostate associated	-1.20074	25.0856	-1.56036	0.308961	-1.8736	0
100039684_at	5031434O11Rik	RIKEN cDNA 5031434O11 gene	-1.26345	6.16911	1.176	14.3309	-1.07437	27.3308
100039691_at	Lncenc1	long non-coding RNA, embryonic stem cells expressed 1	1.06248	42.041	1.14391	14.3309	1.21538	2.97913
100039706_at	Gm2381	zinc finger protein 936 pseudogene	-1.00563	60.7357	1.01617	41.0315	1.01049	31.9769
100039707_at	Mthfsl	5, 10-methenyltetrahydrofolate synthetase-like	-1.155	6.16911	1.05802	26.6761	-1.09166	7.52666
100039724_at	Fkbp1a-ps3	FK506 binding protein 1a, pseudogene 3	-1.01414	60.7357	-1.03057	41.0315	-1.04514	27.3308
100039727_at	1700049E15Rik	RIKEN cDNA 1700049E15 gene	-1.12	42.041	1.36272	2.18295	1.21671	7.52666
100039731_at	Gm10051	predicted pseudogene 10051	1.08724	25.0856	-1.54165	0.0296712	-1.41796	0.0469889
100039736_at	Gm15762	predicted gene 15762	1.30687	1.50007	2.84433	0	3.71718	0
100039739_at	A430060F13Rik	RIKEN cDNA A430060F13 gene	1.07046	42.041	-1.15081	14.3309	-1.07506	31.9769
100039740_at	Gm10260	ribosomal protein S18 pseudogene	1.38651	0.748121	-1.44374	0.130668	-1.04128	34.5868
100039753_at	Gm20815	predicted gene, 20815	-1.07172	57.704	-1.29891	0.803127	-1.39207	0.482549
100039763_at	Gm2411	predicted gene 2411	1.14507	25.0856	1.45078	5.99507	1.66125	2.97913
100039781_at	Hrct1	histidine rich carboxyl terminus 1	-1.33399	2.9847	1.76316	0.0451547	1.32171	0.224685
100039782_at	Gm10709	ribosomal protein L29 pseudogene	1.40474	0.192905	-1.42408	0.0451547	-1.01377	36.5645
100039790_at	Trbv3	T cell receptor beta, variable 3	1.02729	54.2028	1.26724	2.18295	1.30182	0.482549
100039794_at	Gm2427	predicted gene 2427	1.05687	42.041	1.38876	0.308961	1.46774	0.224685
100039795_at	Ildr2	immunoglobulin-like domain containing receptor 2	-1.01639	60.7357	1.1378	14.3309	1.11945	16.9924
100039801_at	Cldn24	claudin 24	1.02332	54.2028	-1.19731	2.18295	-1.17003	2.97913
100039805_at	D5Ertd605e	DNA segment, Chr 5, ERATO Doi 605, expressed	1.22262	2.9847	1.2936	0.803127	1.58158	0.0148586
100039837_at	Gm2449	predicted gene 2449	-1.22868	25.0856	-1.08278	35.7106	-1.33038	0.111227
100039864_at	Snhg12	small nucleolar RNA host gene 12	1.70283	0.104308	-1.39817	0.130668	1.2179	2.97913
100039875_at	Gm10313	glyceraldehyde-3-phosphate dehydrogenase pseudogene	1.51363	0.104308	1.48682	0.0451547	2.2505	0
100039895_at	Gm2479	predicted gene 2479	1.07774	42.041	1.14253	14.3309	1.23135	7.52666
100039899_at	Tex13d	TEX13 family member D	-1.22242	2.9847	1.34492	0.803127	1.10021	16.9924
100039913_at	Rhox2b	reproductive homeobox 2B	-1.09825	54.2028	1.1491	14.3309	1.0463	16.9924
100039924_at	Rps13-ps2	ribosomal protein S13, pseudogene 2	1.85932	0.192905	-2.09638	0.0451547	-1.12749	16.9924
100039940_at	Gm12715	actin, gamma, cytoplasmic 1 pseudogene	1.1061	12.3562	1.02411	35.7106	1.13276	0.482549
100039953_at	Gfy	golgi-associated olfactory signaling regulator	-1.20714	12.3562	1.6579	0.0296712	1.37341	0.482549
100039954_at	Gm2516	predicted gene 2516	1.10863	25.0856	-1.29231	0.803127	-1.16568	1.13219
100039957_at	Gm2518	interferon induced transmembrane protein 2 pseudogene	-1.07124	54.2028	1.25971	5.99507	1.17594	7.52666
100039959_at	Gm10566	glyceraldehyde-3-phosphate dehydrogenase pseudogene	1.41979	0.748121	1.61563	0.0296712	2.29386	0
100039964_at	Gm15411	predicted gene 15411	1.1514	12.3562	-1.23958	2.18295	-1.07658	27.3308
100039968_at	Tmem35b	transmembrane protein 35B	-1.47788	0.301356	1.2122	5.99507	-1.21917	2.97913
100040020_at	Gm15143	predicted gene 15143	-1.05983	60.0813	2.46779	0.0451547	2.32847	0.111227
100040049_at	1810010D01Rik	RIKEN cDNA 1810010D01 gene	-1.24704	12.3562	1.25393	5.99507	1.00553	31.9769
100040123_at	Gm2614	predicted gene 2614	1.20818	6.16911	-1.17498	14.3309	1.02826	31.9769
100040201_at	Gm10229	predicted gene 10229	-1.17381	6.16911	1.39358	0.308961	1.18723	2.97913
100040208_at	Gm2663	predicted gene 2663	-1.11372	42.041	1.53026	0.308961	1.37401	1.13219
100040213_at	Gm2666	predicted gene 2666	-1.41774	25.0856	4.84261	0	3.41573	0.224685
100040214_at	Gm10228	predicted gene 10228	-1.0385	60.7357	2.24214	0.0201689	2.15902	0.0148586
100040233_at	Gm10334	predicted gene 10334	-1.21709	25.0856	1.5134	0.308961	1.24345	2.97913
100040244_at	Gm14698	serine/threonine/tyrosine interaction protein pseudogene	-1.06012	60.0813	-1.22987	14.3309	-1.30381	2.97913
100040248_at	Gm11563	predicted gene 11563	1.10419	25.0856	1.02541	35.7106	1.13224	7.52666
100040268_at	Olfr157	olfactory receptor 157	-1.0645	57.704	2.32414	0	2.18332	0
100040276_at	Gm11595	predicted gene 11595	-1.04181	60.7357	2.26518	0.0296712	2.17427	0
100040293_at	Mindy4b-ps	MINDY lysine 48 deubiquitinase 4B, pseudogene	1.00282	54.2028	1.28611	0.308961	1.28973	0.224685
100040294_at	Gm2694	predicted gene 2694	1.04739	42.041	1.07104	26.6761	1.1218	2.97913
100040299_at	Gm2696	predicted gene 2696	-1.07921	57.704	1.42593	0.308961	1.32127	2.97913
100040322_at	3830408C21Rik	RIKEN cDNA 3830408C21 gene	-1.04058	60.7357	1.05244	26.6761	1.0114	31.9769
100040328_at	Gm2716	predicted gene 2716	-1.11074	42.041	1.09031	14.3309	-1.01873	34.5868
100040339_at	Gm2721	predicted gene 2721	-1.01144	60.7357	1.36934	0.308961	1.35385	0.482549
100040340_at	Gm11273	cytochrome c oxidase, subunit Vb pseudogene	1.13002	25.0856	1.26908	2.18295	1.43408	0.224685
100040414_at	Rpl30-ps6	ribosomal protein L30, pseudogene 6	1.36697	1.50007	-1.05584	41.0315	1.29468	7.52666
100040421_at	Gm2762	predicted gene 2762	-1.02595	60.7357	1.09834	26.6761	1.07055	7.52666
100040447_at	1700036A12Rik	RIKEN cDNA 1700036A12 gene	-1.07525	54.2028	1.73578	0.0201689	1.61431	0
100040462_at	Mndal	myeloid nuclear differentiation antigen like	-1.16479	25.0856	-3.62555	0	-4.22303	0
100040482_at	Btbd35f2	BTB domain containing 35, family member 2	1.23145	12.3562	1.68671	0.308961	2.07709	0.111227
100040493_at	Gm13429	predicted gene 13429	1.27441	6.16911	-1.15114	5.99507	1.10708	7.52666
100040500_at	Gm2808	predicted gene 2808	-1.80489	0.748121	2.52993	0.0296712	1.40171	1.13219
100040525_at	Tmem181c-ps	transmembrane protein 181C, pseudogene	-1.36555	1.50007	-1.23855	5.99507	-1.6913	0.224685
100040529_at	Gm2824	predicted gene 2824	-1.03736	60.0813	1.24592	2.18295	1.20105	1.13219
100040533_at	Btbd35f5	BTB domain containing 35, family member 5	-1.56576	6.16911	3.75993	0	2.40134	0.224685
100040543_at	Gm2830	predicted gene 2830	-1.02463	60.7357	1.0886	14.3309	1.06243	16.9924
100040551_at	Gm10036	ribosomal protein L11 pseudogene	1.19342	2.9847	-1.17714	0.803127	1.01383	31.9769
100040557_at	Gm12408	predicted gene 12408	1.07765	42.041	-1.16796	5.99507	-1.0838	27.3308
100040567_at	Gm12409	predicted gene 12409	-1.36516	2.9847	1.44432	0.803127	1.05799	27.3308
100040572_at	Gm2848	predicted gene 2848	-1.34854	1.50007	-1.51865	0.0451547	-2.04797	0
100040589_at	Gm10242	predicted gene 10242	-1.09098	57.704	1.07807	26.6761	-1.01198	36.5645
100040591_at	Kcnj13	potassium inwardly-rectifying channel, subfamily J, member 13	-1.19251	12.3562	1.25525	2.18295	1.05261	27.3308
100040599_at	Gm15319	predicted gene 15319	-1.32338	2.9847	1.90623	0.803127	1.44043	7.52666
100040606_at	Btbd35f12	BTB domain containing 35, family member 12	-1.42474	1.50007	1.867	0.130668	1.31042	2.97913
100040608_at	Fancf	Fanconi anemia, complementation group F	1.34423	1.50007	-1.25477	0.803127	1.0713	16.9924
100040611_at	Gm10154	ribosomal protein L34 pseudogene	1.16919	6.16911	-1.05888	26.6761	1.10418	7.52666
100040617_at	Gm12603	predicted gene 12603	1.08123	25.0856	1.15084	14.3309	1.24432	2.97913
100040657_at	Gm2888	predicted gene 2888	-1.0868	57.704	1.59689	0.803127	1.46935	1.13219
100040671_at	Gm2897	predicted gene 2897	1.27266	6.16911	1.14903	14.3309	1.46232	0.482549
100040710_at	Gm13219	predicted gene 13219	-1.01241	60.7357	1.18802	0.803127	1.17346	0.482549
100040722_at	Btbd35f13	BTB domain containing 35, family member 13	1.04469	42.041	4.03347	0	4.21372	0
100040724_at	Mirg	miRNA containing gene	1.10352	25.0856	-1.01746	41.0315	1.08457	16.9924
100040732_at	Btbd35f14	BTB domain containing 35, family member 14	1.14379	42.041	3.45843	0	3.9557	0
100040736_at	Foxd2os	forkhead box D2, opposite strand	-1.02914	60.7357	-1.19527	2.18295	-1.2301	0.482549
100040745_at	Rpl17-ps3	ribosomal protein L17, pseudogene 3	1.06597	42.041	-1.21247	2.18295	-1.13743	7.52666
100040766_at	Mroh2a	maestro heat-like repeat family member 2A	1.02651	54.2028	1.75666	0.0451547	1.80322	0.0148586
100040769_at	Gm15506	predicted gene 15506	-1.06923	54.2028	1.13313	14.3309	1.05977	16.9924
100040781_at	Btbd35f6	BTB domain containing 35, family member 6	1.07437	42.041	35.154	0	37.7686	0
100040792_at	Gm11627	predicted gene 11627	1.11364	25.0856	-1.06833	26.6761	1.04241	16.9924
100040822_at	Gm1604a	predicted gene 1604A	1.32547	6.16911	1.11909	26.6761	1.48333	0.224685
100040823_at	Gm10269	ribosomal protein L35 pseudogene	1.5082	0.748121	-1.44893	0.803127	1.0409	31.9769
100040843_at	Cyp4a32	cytochrome P450, family 4, subfamily a, polypeptide 32	1.01169	54.2028	-1.08161	14.3309	-1.06912	16.9924
100040851_at	Gm9767	predicted gene 9767	1.36731	1.50007	-1.23276	2.18295	1.10914	7.52666
100040882_at	1700017G19Rik	RIKEN cDNA 1700017G19 gene	-1.03428	60.0813	1.02663	35.7106	-1.00746	36.5645
100040899_at	Gm15142	predicted gene 15142	-1.12347	42.041	1.07359	26.6761	-1.04646	34.5868
100040926_at	Gm3045	predicted gene 3045	1.02338	54.2028	-1.05432	26.6761	-1.03024	34.5868
100040929_at	Gm10362	predicted gene 10362	1.76007	0.104308	-1.3544	0.803127	1.29952	2.97913
100040937_at	Cldn34b1	claudin 34B1	1.00772	54.2028	1.10734	14.3309	1.11589	7.52666
100040972_at	Tceal7	transcription elongation factor A (SII)-like 7	1.14226	12.3562	-1.28123	0.803127	-1.12166	16.9924
100040999_at	Gm3086	RuvB-like protein 1 pseudogene	1.37977	0.748121	-1.13225	26.6761	1.2186	7.52666
100041062_at	Gm13286	predicted gene 13286	1.24353	12.3562	1.20322	5.99507	1.49624	0.482549
100041077_at	Gm13102	predicted gene 13102	-1.00145	60.7357	1.28709	2.18295	1.28523	0.482549
100041085_at	Mfsd4b3	major facilitator superfamily domain containing 4B3	1.72186	0.301356	-1.91292	0.0296712	-1.11096	16.9924
100041089_at	Gm3134	predicted gene 3134	1.0222	54.2028	1.21103	2.18295	1.23791	1.13219
100041092_at	Gm10238	predicted pseudogene 10238	1.06043	42.041	1.27359	14.3309	1.35055	7.52666
100041096_at	Iqcf6	IQ motif containing F6	1.17512	12.3562	-1.00561	43.2839	1.16857	2.97913
100041108_at	Gm3143	predicted gene 3143	-1.03118	60.0813	1.03979	26.6761	1.00835	31.9769
100041120_at	Gm3150	guanine nucleotide binding protein (G protein), gamma 5 pseudogene	-1.04032	60.0813	-1.10446	14.3309	-1.149	2.97913
100041121_at	Gm10144	predicted pseudogene 10144	1.04184	42.041	-1.15712	5.99507	-1.11066	7.52666
100041146_at	Gm15448	predicted gene 15448	-1.00759	60.7357	-1.3061	2.18295	-1.31601	1.13219
100041187_at	Olfr596	olfactory receptor 596	-1.36936	12.3562	2.11106	0.130668	1.54164	0.482549
100041194_at	Ahnak2	AHNAK nucleoprotein 2	-1.15435	12.3562	1.04604	35.7106	-1.10355	16.9924
100041224_at	Gm3213	predicted gene 3213	1.39238	1.50007	-1.39993	0.308961	-1.00542	36.5645
100041231_at	Gm3219	B-cell CLL/lymphoma 7C pseudogene	-1.0279	60.7357	-1.1819	5.99507	-1.21488	7.52666
100041236_at	Gm3222	glyceraldehyde-3-phosphate dehydrogenase pseudogene	1.26065	0.748121	-1.01804	41.0315	1.23831	0.0469889
100041244_at	Gm3230	predicted gene 3230	-1.19583	25.0856	-1.08252	26.6761	-1.29451	1.13219
100041261_at	Gm3238	predicted gene 3238	-1.8263	0.192905	2.73308	0.0201689	1.49652	0.224685
100041265_at	Gm9755	Tu translation elongation factor pseudogene	1.96737	0	-1.89961	0	1.03567	16.9924
100041281_at	Gm3250	predicted gene 3250	-1.04665	60.7357	2.45239	0.0296712	2.34307	0.0469889
100041284_at	Gm20868	predicted gene, 20868	1.12727	42.041	1.03231	41.0315	1.16369	7.52666
100041286_at	Snhg15	small nucleolar RNA host gene 15	1.50367	0.301356	-1.36122	0.0296712	1.10465	7.52666
100041290_at	D4Ertd617e	DNA segment, Chr 4, ERATO Doi 617, expressed	1.20792	12.3562	1.21464	5.99507	1.46719	0.482549
100041294_at	Supt4b	suppressor of Ty 4B	1.00101	54.2028	-1.12564	26.6761	-1.1245	27.3308
100041296_at	Gm3259	predicted gene 3259	-1.15107	25.0856	1.4468	0.803127	1.25692	2.97913
100041311_at	Gm11978	predicted gene 11978	1.03185	42.041	1.20363	5.99507	1.24196	2.97913
100041336_at	Gm3278	predicted gene 3278	-1.0081	60.7357	3.22316	0	3.19727	0
100041339_at	Gm3279	predicted gene 3279	1.09413	25.0856	-1.11617	14.3309	-1.02014	36.5645
100041347_at	Gm11985	predicted gene 11985	1.01943	54.2028	-1.13619	14.3309	-1.11453	16.9924
100041351_at	Gm3285	predicted gene 3285	-1.16748	42.041	2.07638	0	1.77851	0.0469889
100041352_at	Tcp10c	t-complex protein 10c	-1.28396	25.0856	1.46575	14.3309	1.14159	27.3308
100041354_at	Gm3286	predicted gene 3286	1.10378	42.041	-1.13038	14.3309	-1.0241	36.5645
100041375_at	Cyp3a41b	cytochrome P450, family 3, subfamily a, polypeptide 41B	1.2414	6.16911	1.91797	0.0296712	2.38096	0
100041399_at	Gm10327	glyceraldehyde-3-phosphate dehydrogenase pseudogene	1.38714	0.192905	1.07904	14.3309	1.49679	0
100041400_at	Gm12226	oxidative stress responsive 1 pseudogene	-1.14507	25.0856	-1.19201	2.18295	-1.36494	0.224685
100041412_at	Gm11938	predicted gene 11938	1.13367	25.0856	1.71921	0.0296712	1.94901	0
100041420_at	Gm3325	predicted gene 3325	1.35152	1.50007	-1.59717	0.130668	-1.18176	7.52666
100041433_at	Zfp981	zinc finger protein 981	-1.27011	6.16911	2.10005	0.0201689	1.65344	0.224685
100041449_at	Cyp3a59	cytochrome P450, family 3, subfamily a, polypeptide 59	-1.04894	60.0813	1.19645	5.99507	1.14063	7.52666
100041450_at	Gimap1os	GTPase, IMAP family member 1, opposite strand	2.08737	0.104308	-1.73886	0.0451547	1.20042	7.52666
100041479_at	Gm3363	predicted gene 3363	1.01082	54.2028	1.16571	14.3309	1.17832	7.52666
100041480_at	Gm9833	myelin basic protein expression factor 2, repressor pseudogene	1.01833	54.2028	1.10637	26.6761	1.12666	16.9924
100041488_at	Gm11937	predicted gene 11937	1.07575	42.041	1.39456	0.130668	1.5002	1.13219
100041505_at	Gm3376	predicted gene 3376	-1.10714	54.2028	-1.10258	35.7106	-1.22071	16.9924
100041521_at	Gm3386	cytochrome c oxidase, subunit VIIc pseudogene	1.37563	6.16911	-1.4137	0.803127	-1.02768	36.5645
100041546_at	Ly6c2	lymphocyte antigen 6 complex, locus C2	-5.38406	0	1.57892	0.130668	-3.40996	0
100041562_at	Gm14762	predicted gene 14762	1.16288	12.3562	-1.07815	26.6761	1.07859	16.9924
100041566_at	Gm3409	predicted gene 3409	-1.09033	54.2028	1.92459	0.0451547	1.76515	0
100041574_at	9030025P20Rik	RIKEN cDNA 9030025P20 gene	-1.56027	0.748121	1.20349	5.99507	-1.29645	2.97913
100041576_at	Gm3414	predicted gene 3414	-1.92594	0.748121	-1.12289	35.7106	-2.16262	1.13219
100041581_at	Zkscan16	zinc finger with KRAB and SCAN domains 16	1.03271	42.041	-1.08991	26.6761	-1.05539	31.9769
100041585_at	Amd2	S-adenosylmethionine decarboxylase 2	1.62187	0.301356	-1.10721	14.3309	1.46483	1.13219
100041586_at	Gm3417	predicted gene 3417	1.46631	1.50007	1.53707	0.308961	2.25383	0.0469889
100041596_at	Gal3st2b	galactose-3-O-sulfotransferase 2B	-1.05036	57.704	1.31543	5.99507	1.25236	7.52666
100041605_at	Gm3428	predicted gene 3428	-1.37022	12.3562	1.72619	0.803127	1.25979	16.9924
100041618_at	Gm3434	predicted gene 3434	1.01026	54.2028	-1.19696	5.99507	-1.18481	16.9924
100041622_at	Gm3436	ribosomal RNA processing 7 homolog A pseudogene	1.24316	2.9847	-1.11319	5.99507	1.11675	2.97913
100041649_at	Mpc1-ps	mitochondrial pyruvate carrier 1, pseudogene	1.42174	0.301356	-1.22067	2.18295	1.16472	7.52666
100041655_at	Gm10863	predicted gene 10863	-1.13376	42.041	1.25975	0.803127	1.11113	16.9924
100041677_at	Zfp984	zinc finger protein 984	-1.30859	6.16911	1.09951	26.6761	-1.19016	2.97913
100041680_at	Gm3470	predicted gene 3470	-1.07692	57.704	1.38085	0.308961	1.28222	2.97913
100041694_at	Gm10451	predicted gene 10451	1.15961	12.3562	1.03015	35.7106	1.19458	2.97913
100041697_at	Gm14719	predicted gene 14719	-1.05954	54.2028	-1.84863	0	-1.9587	0
100041724_at	Gm15217	predicted gene 15217	-1.04849	57.704	1.14582	14.3309	1.09283	16.9924
100041734_at	4930522L14Rik	RIKEN cDNA 4930522L14 gene	-1.44363	0.748121	1.0172	41.0315	-1.41923	0.482549
100041739_at	1700025D23Rik	RIKEN cDNA 1700025D23 gene	1.53244	1.50007	-1.09371	26.6761	1.40114	1.13219
100041748_at	Gm10291	glyceraldehyde-3-phosphate dehydrogenase pseudogene	1.30659	0.748121	1.13342	5.99507	1.48092	0
100041749_at	Speer4f2	spermatogenesis associated glutamate (E)-rich protein 4f2	-1.07955	54.2028	1.54106	0.308961	1.42749	0.224685
100041759_at	Gm15293	predicted gene 15293	-1.05562	60.0813	1.20236	2.18295	1.13901	7.52666
100041781_at	Gm3510	predicted gene 3510	-1.1558	12.3562	1.54679	0.308961	1.33829	1.13219
100041786_at	Gm3511	40S ribosomal protein S28 pseudogene	1.14516	12.3562	-1.29607	0.803127	-1.13178	7.52666
100041787_at	Gm15292	predicted gene 15292	-1.11788	57.704	1.39051	5.99507	1.24388	16.9924
100041811_at	Defa27	defensin, alpha, 27	-1.08785	54.2028	1.12965	14.3309	1.03842	27.3308
100041859_at	Gm3550	ribosomal protein L29 pseudogene	1.25801	0.748121	-1.17532	0.803127	1.07036	7.52666
100041925_at	Gm14586	predicted gene 14586	1.15082	12.3562	1.01921	35.7106	1.17293	2.97913
100041952_at	Defa34	defensin, alpha, 34	1.01751	54.2028	-1.0658	41.0315	-1.04746	36.5645
100041953_at	Sap18b	Sin3-associated polypeptide 18B	1.22699	6.16911	-1.47196	0.130668	-1.19965	1.13219
100041958_at	Gm3591	predicted gene 3591	1.45409	2.9847	2.35547	0.0296712	3.42507	0
100041965_at	Oaz1-ps	ornithine decarboxylase antizyme 1, pseudogene	-1.00206	60.7357	-1.18836	2.18295	-1.19081	1.13219
100041979_at	Gm3604	predicted gene 3604	1.70119	0.192905	-1.76963	0.0451547	-1.04023	34.5868
100041985_at	Gm3608	capping protein (actin filament) muscle Z-line, alpha 1 pseudogene	1.03728	54.2028	-1.24981	5.99507	-1.2049	7.52666
100042001_at	Gm14750	odorant binding protein I f-like pseudogene	1.24495	2.9847	-1.30087	0.130668	-1.04491	31.9769
100042008_at	Gm9794	predicted pseudogene 9794	1.13735	12.3562	-1.14811	2.18295	-1.00946	36.5645
100042024_at	Gm3629	predicted gene 3629	-1.16935	42.041	1.30639	2.18295	1.11719	16.9924
100042025_at	Gapdh-ps15	glyceraldehyde-3-phosphate dehydrogenase, pseudogene 15	1.7853	0.104308	1.78631	0.0201689	3.18909	0
100042049_at	Gm15421	ribosomal protein L22 like 1 pseudogene	1.11096	42.041	-1.14853	14.3309	-1.03382	31.9769
100042056_at	9130019P16Rik	RIKEN cDNA 9130019P16 gene	-1.05542	57.704	1.21588	2.18295	1.15203	2.97913
100042065_at	Gm3646	predicted gene 3646	1.04431	42.041	-1.04176	41.0315	1.00244	31.9769
100042074_at	Gm3650	predicted gene 3650	1.06298	42.041	1.35202	2.18295	1.43718	0.482549
100042132_at	Gm12371	predicted gene 12371	1.12328	25.0856	-1.03848	35.7106	1.08165	7.52666
100042143_at	Gm3693	predicted gene 3693	1.14407	25.0856	-1.0449	41.0315	1.09491	7.52666
100042149_at	Gm3696	predicted gene 3696	-1.32269	6.16911	8.72317	0	6.59501	0
100042150_at	Nrg2	neuregulin 2	-1.21382	12.3562	1.10861	14.3309	-1.09491	7.52666
100042159_at	Btbd35f16	BTB domain containing 35, family member 16	-1.08822	60.0813	2.06246	0.0296712	1.89525	0.482549
100042165_at	BC005561	cDNA sequence BC005561	-1.00165	60.7357	-1.43604	0.308961	-1.43841	0.111227
100042173_at	Rps15a-ps6	ribosomal protein S15A, pseudogene 6	-1.04737	60.0813	1.05203	35.7106	1.00445	31.9769
100042178_at	Gm13111	predicted gene 13111	-1.16525	42.041	1.38774	0.803127	1.19094	2.97913
100042180_at	Gm11353	ribosomal protein S8 pseudogene	1.22619	6.16911	1.11054	14.3309	1.36173	0.111227
100042194_at	Gm13446	predicted gene 13446	1.28557	2.9847	-1.16723	26.6761	1.10138	27.3308
100042198_at	Gm3716	predicted gene 3716	1.13003	25.0856	1.07915	26.6761	1.21947	2.97913
100042237_at	Gm3740	predicted gene 3740	-1.12322	42.041	1.04885	26.6761	-1.07091	27.3308
100042275_at	Btbd35f27	BTB domain containing 35, family member 27	-1.03597	60.0813	1.13778	5.99507	1.09827	7.52666
100042277_at	Gm3764	predicted gene 3764	-1.04838	60.0813	1.16018	5.99507	1.10665	7.52666
100042314_at	Gm10639	predicted gene 10639	1.02108	54.2028	1.45353	2.18295	1.48416	0.482549
100042332_at	2810410L24Rik	RIKEN cDNA 2810410L24 gene	-1.03669	60.0813	-1.04565	35.7106	-1.08401	27.3308
100042335_at	Rps15a-ps5	ribosomal protein S15A, pseudogene 5	1.21407	6.16911	-1.46306	0.130668	-1.20508	7.52666
100042342_at	Gm10375	predicted gene 10375	1.09068	42.041	1.00777	42.8252	1.09916	16.9924
100042355_at	Gm10705	predicted gene 10705	1.07989	42.041	-1.24117	0.803127	-1.14935	7.52666
100042372_at	Trav2	T cell receptor alpha variable 2	-1.03353	60.7357	1.56129	0.0451547	1.51064	0.224685
100042405_at	Gm10282	high mobility group nucleosomal binding domain 2 pseudogene	-1.37858	0.301356	1.16166	2.18295	-1.18674	0.482549
100042415_at	Mnd1-ps	Mnd1 retrotransposed pseudogene	1.00918	54.2028	-1.01498	42.8252	-1.00575	36.5645
100042419_at	Trav7d-3	T cell receptor alpha variable 7D-3	1.42019	6.16911	1.30438	14.3309	1.85247	0.0469889
100042424_at	Pdcd5-ps	programmed cell death 5, pseudogene	1.76363	0.0881706	-1.53937	0.0296712	1.14568	7.52666
100042427_at	Gm3839	glyceraldehyde-3-phosphate dehydrogenase pseudogene	1.23225	1.50007	1.06417	14.3309	1.31132	0
100042437_at	Vmn1r79	vomeronasal 1 receptor 79	1.17507	25.0856	1.25698	14.3309	1.47705	2.97913
100042450_at	Smim17	small integral membrane protein 17	1.0185	54.2028	1.08472	14.3309	1.10479	7.52666
100042453_at	Gm3852	Blcap pseudogene	1.03601	54.2028	1.02522	41.0315	1.06214	27.3308
100042480_at	Nhsl2	NHS-like 2	-2.51611	0	1.28359	0.308961	-1.96022	0
100042484_at	4732419C18Rik	RIKEN cDNA 4732419C18 gene	1.20617	6.16911	1.09133	5.99507	1.31632	0.482549
100042498_at	Mir22hg	Mir22 host gene (non-protein coding)	-1.25045	6.16911	1.78386	0.0296712	1.42657	0.482549
100042513_at	Gm3878	predicted gene 3878	-1.17173	12.3562	1.47469	0.0451547	1.25856	0.482549
100042514_at	Sprr2a3	small proline-rich protein 2A3	1.01713	54.2028	1.71733	0.130668	1.74675	0.0148586
100042554_at	Gm3902	predicted gene 3902	-1.48222	0.301356	-1.75065	0.0296712	-2.59486	0
100042584_at	Gm16523	mitochondrial ribosomal protein L40 pseudogene	-1.04186	60.0813	-1.11181	14.3309	-1.15835	7.52666
100042605_at	Rbakdn	RB-associated KRAB zinc finger downstream neighbor (non-protein coding)	-1.00724	60.7357	1.19308	2.18295	1.1845	1.13219
100042625_at	Gstp-ps	glutathione S-transferase, pi, pseudogene	1.02039	54.2028	1.04686	35.7106	1.0682	16.9924
100042634_at	Gm3940	ribosomal protein L23A pseudogene	1.0572	42.041	-1.39649	0.803127	-1.32093	1.13219
100042636_at	Vmn2r34	vomeronasal 2, receptor 34	1.04198	54.2028	-1.07267	41.0315	-1.02945	36.5645
100042648_at	Gm3948	predicted gene 3948	1.09008	25.0856	1.19819	0.803127	1.30613	0.111227
100042663_at	1700003E24Rik	Gm5941 pseudogene	1.20206	12.3562	-1.29848	2.18295	-1.08021	31.9769
100042679_at	Gm16386	zinc finger protein 946 pseudogene	-1.17532	25.0856	1.06224	26.6761	-1.10645	27.3308
100042715_at	Gm3985	predicted gene 3985	1.02103	54.2028	-1.00652	43.2839	1.01442	31.9769
100042734_at	Gm10073	ribosomal protein, large, P1 pseudogene	1.41585	0.748121	-1.27561	0.803127	1.10994	7.52666
100042757_at	Gm4013	predicted gene 4013	1.13738	25.0856	-1.19799	5.99507	-1.05329	31.9769
100042773_at	Tmed10-ps	transmembrane p24 trafficking protein 10, pseudogene	1.31649	1.50007	-1.04746	35.7106	1.25684	0.224685
100042784_at	Prdm11	PR domain containing 11	-1.24512	6.16911	-1.13104	26.6761	-1.40828	1.13219
100042802_at	AI463229	expressed sequence AI463229	-1.14957	42.041	1.24655	5.99507	1.08436	16.9924
100042810_at	Vmn2r45	vomeronasal 2, receptor 45	-1.01514	60.7357	2.1883	0	2.15566	0
100042812_at	Rps26-ps1	ribosomal protein S26, pseudogene 1	1.19645	6.16911	-1.09318	14.3309	1.09446	7.52666
100042814_at	Apol7d	apolipoprotein L 7d	-1.12106	42.041	1.19718	2.18295	1.0679	16.9924
100042823_at	Rpl9-ps6	ribosomal protein L9, pseudogene 6	1.2363	2.9847	-1.27916	0.130668	-1.03467	34.5868
100042827_at	Gm12052	predicted gene 12052	1.25617	6.16911	-1.16991	5.99507	1.07373	16.9924
100042832_at	Rpl9-ps4	ribosomal protein L9, pseudogene 4	1.38071	0.748121	1.13495	14.3309	1.56704	0.224685
100042851_at	Gm4066	smoothened homolog pseudogene	1.06582	42.041	-1.24933	5.99507	-1.17218	27.3308
100042855_at	Gm10267	predicted gene 10267	1.09092	25.0856	1.05879	26.6761	1.15506	1.13219
100042856_at	Gm4070	predicted gene 4070	1.86288	0.301356	-5.58805	0	-2.99968	0.0469889
100042872_at	Gm10112	developmental pluripotency associated 5 pseudogene	1.0229	54.2028	1.00261	42.8252	1.02556	31.9769
100042875_at	Gm12059	predicted gene 12059	-1.07783	54.2028	1.06561	26.6761	-1.01147	36.5645
100042889_at	C920021L13Rik	RIKEN cDNA C920021L13 gene	-1.08952	42.041	1.1092	14.3309	1.01806	31.9769
100042921_at	Vmn2r51	vomeronasal 2, receptor 51	-1.11137	25.0856	1.0812	14.3309	-1.02791	34.5868
100042926_at	Gm13546	predicted gene 13546	1.16692	12.3562	-1.12235	14.3309	1.03971	27.3308
100042940_at	Gm4117	predicted gene 4117	1.21178	25.0856	-1.37098	5.99507	-1.13138	31.9769
100042948_at	Gm15760	mitochondrial ribosomal protein S18B pseudogene	-1.11502	42.041	1.08136	26.6761	-1.03113	36.071
100043000_at	Rpl3-ps1	ribosomal protein L3, pseudogene 1	1.50578	0.301356	-1.63835	0.0296712	-1.08804	27.3308
100043022_at	Gm9774	adhesion regulating molecule 1 pseudogene	1.55968	0.301356	-1.09306	26.6761	1.42689	0.224685
100043034_at	Rex2	reduced expression 2	-1.01263	60.7357	-1.34165	5.99507	-1.3586	2.97913
100043040_at	1110002L01Rik	RIKEN cDNA 1110002L01 gene	1.00782	54.2028	-1.38733	0.130668	-1.37657	0.0469889
100043042_at	Zscan4-ps3	zinc finger and SCAN domain containing 4, pseudogene 3	-1.1699	12.3562	-1.83381	0.0201689	-2.14538	0
100043051_at	Vmn1r149	vomeronasal 1 receptor 149	1.0955	42.041	-1.04602	35.7106	1.0473	27.3308
100043057_at	Tmem207	transmembrane protein 207	1.07507	42.041	1.80561	0.0451547	1.94116	0
100043065_at	6030469F06Rik	RIKEN cDNA 6030469F06 gene	-1.02618	60.7357	1.14459	5.99507	1.11539	7.52666
100043067_at	Vmn1r158	vomeronasal 1 receptor 158	-1.05423	60.0813	1.68994	0.0451547	1.60301	0.111227
100043072_at	A230070E04Rik	RIKEN cDNA A230070E04 gene	1.10559	25.0856	-1.09125	14.3309	1.01314	31.9769
100043074_at	Gm4211	predicted gene 4211	-1.13887	42.041	1.5233	0.803127	1.33756	1.13219
100043089_at	Gm4221	predicted gene 4221	-1.25279	2.9847	1.60412	0.0296712	1.28043	0.482549
100043092_at	Gm4224	predicted gene 4224	1.12707	25.0856	1.07912	26.6761	1.21623	2.97913
100043101_at	Vmn1r168	vomeronasal 1 receptor 168	1.00085	54.2028	1.29804	2.18295	1.29915	1.13219
100043102_at	4632428C04Rik	RIKEN cDNA 4632428C04 gene	-1.43271	0.748121	1.52676	0.130668	1.06565	16.9924
100043103_at	Vmn1r169	vomeronasal 1 receptor 169	-1.11563	42.041	1.08426	26.6761	-1.02893	36.5645
100043108_at	Cyp2c69	cytochrome P450, family 2, subfamily c, polypeptide 69	-1.08088	57.704	1.35548	2.18295	1.25406	2.97913
100043132_at	Gm4251	predicted gene 4251	1.14669	25.0856	-1.06532	35.7106	1.07638	16.9924
100043133_at	9130023H24Rik	RIKEN cDNA 9130023H24 gene	-1.1722	12.3562	-1.17849	2.18295	-1.38143	0
100043147_at	Gm4262	predicted gene 4262	1.05168	42.041	1.07312	26.6761	1.12858	2.97913
100043150_at	Gm4265	predicted gene 4265	-1.04884	57.704	1.09533	14.3309	1.04433	16.9924
100043158_at	Gm4271	h-2 class I histocompatibility antigen, Q10 alpha chain-like	1.05845	42.041	1.34263	2.18295	1.42111	0.224685
100043160_at	Gm10012	cytochrome c oxidase, subunit VIIc pseudogene	-1.14729	25.0856	4.04204	0	3.52312	0
100043169_at	Gm4278	predicted gene 4278	1.07444	42.041	1.22513	5.99507	1.31632	0.482549
100043172_at	Gm10080	predicted gene 10080	-1.13174	25.0856	-1.06655	26.6761	-1.20707	2.97913
100043176_at	Gm15628	predicted gene 15628	1.04789	42.041	-1.08802	26.6761	-1.03829	34.5868
100043188_at	Gm10696	predicted gene 10696	-1.37416	12.3562	1.61596	5.99507	1.17596	16.9924
100043189_at	Gm4285	predicted gene 4285	-1.1377	25.0856	1.12469	14.3309	-1.01156	36.5645
100043194_at	Sult2a2	sulfotransferase family 2A, dehydroepiandrosterone (DHEA)-preferring, member 2	-1.06389	54.2028	-1.14633	14.3309	-1.21956	2.97913
100043200_at	Olfr819	olfactory receptor 819	-1.02911	60.7357	1.55567	0.803127	1.51167	1.13219
100043213_at	5330434G04Rik	RIKEN cDNA 5330434G04 gene	-1.18837	25.0856	1.53372	0.308961	1.2906	1.13219
100043215_at	Rpl36-ps3	ribosomal protein L36, pseudogene 3	1.20526	12.3562	-2.29188	0	-1.90157	0.0148586
100043216_at	Gm4297	predicted gene 4297	-1.06209	57.704	-1.01759	41.0315	-1.08077	27.3308
100043225_at	Gm16378	eukaryotic translation initiation factor 1 pseudogene	1.09552	42.041	-1.40453	2.18295	-1.28207	1.13219
100043229_at	Gm10046	predicted gene 10046	1.08149	42.041	1.11434	14.3309	1.20514	2.97913
100043232_at	3110099E03Rik	RIKEN cDNA 3110099E03 gene	1.11635	25.0856	-1.02954	41.0315	1.08432	7.52666
100043254_at	Nps	neuropeptide S	1.1074	25.0856	1.17358	5.99507	1.29962	1.13219
100043272_at	Inafm2	InaF motif containing 2	-1.49027	0.301356	-1.0446	35.7106	-1.55674	0
100043300_at	Esp16	exocrine gland secreted peptide 16	-1.0489	57.704	-1.14542	5.99507	-1.20144	1.13219
100043305_at	Gm4349	SET domain, bifurcated 1 pseudogene	-1.15238	42.041	1.74499	0.308961	1.51425	0.482549
100043308_at	Trav14n-3	T cell receptor alpha variable 14N-3	1.05754	42.041	1.21237	5.99507	1.28213	1.13219
100043309_at	4732414G09Rik	RIKEN cDNA 4732414G09 gene	1.01613	54.2028	1.02112	41.0315	1.03759	27.3308
100043314_at	Tigit	T cell immunoreceptor with Ig and ITIM domains	1.39869	0.748121	-1.19656	5.99507	1.16893	0.482549
100043315_at	LOC100043315	uncharacterized LOC100043315	1.0004	54.2028	1.13516	5.99507	1.13562	2.97913
100043322_at	Trav12-2	T cell receptor alpha variable 12-2	1.36468	2.9847	-1.12082	26.6761	1.21757	2.97913
100043326_at	Scgb2b3	secretoglobin, family 2B, member 3	1.02402	54.2028	-1.03076	35.7106	-1.00659	36.5645
100043332_at	Ankrd66	ankyrin repeat domain 66	1.6368	0.748121	-1.11078	26.6761	1.47355	0.111227
100043335_at	Gm4371	eukaryotic translation initiation factor 3, subunit I pseudogene	-1.02188	60.7357	1.22098	5.99507	1.19483	2.97913
100043407_at	Gm4419	predicted gene 4419	1.04321	42.041	1.01074	41.0315	1.05442	16.9924
100043424_at	Gm14005	predicted gene 14005	-1.34495	2.9847	1.80585	0.0296712	1.34269	0.0148586
100043450_at	AA387883	expressed sequence AA387883	1.0896	25.0856	1.31071	2.18295	1.42815	0.224685
100043461_at	Gm4450	predicted gene 4450	1.31083	6.16911	2.02593	0.0296712	2.65566	0
100043464_at	Gm4451	predicted gene 4451	1.23638	12.3562	-1.23522	2.18295	1.00094	31.9769
100043467_at	Gm4454	predicted gene 4454	1.00149	54.2028	-1.06086	35.7106	-1.05928	36.071
100043468_at	Zfp955b	zinc finger protein 955B	-1.36608	6.16911	-1.19373	14.3309	-1.63073	0.224685
100043474_at	Olfr1564	olfactory receptor 1564	1.03288	54.2028	-1.00703	42.8252	1.02567	27.3308
100043488_at	Gm4473	predicted gene 4473	1.06477	42.041	-1.02194	41.0315	1.0419	31.9769
100043489_at	1300002E11Rik	RIKEN cDNA 1300002E11 gene	1.01169	54.2028	-2.80041	0	-2.76805	0
100043490_at	Gm10355	RAN guanine nucleotide release factor pseudogene	1.06719	42.041	1.59632	0.803127	1.70358	0.224685
100043497_at	Nat8f7	N-acetyltransferase 8 (GCN5-related) family member 7	-1.07963	54.2028	1.05461	26.6761	-1.02373	36.5645
100043507_at	Gng5-ps	G protein subunit gamma 5, pseudogene	-1.12184	42.041	1.18616	2.18295	1.05734	27.3308
100043513_at	Gm4489	predicted gene 4489	1.21774	6.16911	-1.08445	26.6761	1.12291	2.97913
100043515_at	Gm4491	predicted gene 4491	1.0612	42.041	-1.06333	26.6761	-1.002	36.5645
100043580_at	Gm4532	predicted gene 4532	-1.08123	54.2028	-1.01724	42.8252	-1.09987	27.3308
100043582_at	AU016765	expressed sequence AU016765	-1.093	54.2028	1.26793	2.18295	1.16005	2.97913
100043585_at	Gm4535	RAN guanine nucleotide release factor pseudogene	1.01121	54.2028	-1.17972	5.99507	-1.16664	16.9924
100043594_at	Gm4540	predicted gene 4540	1.72086	0.0546658	-2.26347	0	-1.31531	0.111227
100043597_at	Srcap	Snf2-related CREBBP activator protein	-1.44382	0.192905	1.07123	26.6761	-1.34781	0.0148586
100043600_at	Gm4544	predicted gene 4544	-1.06157	57.704	1.08221	26.6761	1.01944	31.9769
100043606_at	Arl4aos	ADP-ribosylation factor-like 4A, opposite strand	1.02039	54.2028	-1.03345	35.7106	-1.01279	36.5645
100043609_at	Gm14207	predicted gene 14207	-1.15969	25.0856	1.03862	35.7106	-1.11657	7.52666
100043617_at	Gm4553	predicted gene 4553	-1.22306	25.0856	1.22948	14.3309	1.00525	31.9769
100043618_at	Gm10120	small nuclear ribonucleoprotein D2 pseudogene	1.00197	54.2028	-1.00227	43.2839	-1.00029	36.5645
100043627_at	Gm4559	predicted gene 4559	-1.07172	60.0813	2.99221	0	2.79197	0
100043636_at	AI662270	expressed sequence AI662270	1.49022	0.0881706	-1.71875	0	-1.15335	0.482549
100043644_at	Gm4566	ubiquitin specific peptidase 16 pseudogene	1.02394	54.2028	-1.01326	42.8252	1.01054	31.9769
100043682_at	Gm10584	predicted gene 10584	-1.11609	54.2028	-1.21095	14.3309	-1.35153	2.97913
100043706_at	Gm4598	predicted gene 4598	1.11927	12.3562	-1.06911	14.3309	1.04692	16.9924
100043718_at	Gm4604	predicted gene 4604	1.3252	2.9847	-2.07098	0.0296712	-1.56277	0.224685
100043724_at	Gm4609	glyceraldehyde-3-phosphate dehydrogenase pseudogene	1.45973	0.748121	1.57044	0.308961	2.29242	0
100043726_at	Gm4610	predicted gene 4610	1.17447	25.0856	-1.62549	0.308961	-1.38402	1.13219
100043729_at	Gm14010	predicted gene 14010	-1.01999	60.7357	-1.22352	2.18295	-1.24797	1.13219
100043752_at	Rps2-ps6	ribosomal protein S2, pseudogene 6	1.70514	0.0881706	-1.11983	14.3309	1.52268	0.111227
100043755_at	Gm10132	ribosomal protein L23A pseudogene	1.16376	12.3562	-1.02661	41.0315	1.1336	7.52666
100043757_at	Zfp831	zinc finger protein 831	-2.30886	0	1.63243	0.0296712	-1.41437	0
100043766_at	Gm14057	Ppp1r14c pseudogene	-1.00195	60.7357	-1.04733	41.0315	-1.04938	34.5868
100043772_at	Zfp850	zinc finger protein 850	1.15784	25.0856	-1.20968	5.99507	-1.04478	34.5868
100043780_at	Rps3a2	ribosomal protein S3A2	1.35331	2.9847	-1.95017	0.0296712	-1.44104	0.111227
100043793_at	Gm4651	predicted gene 4651	1.0268	54.2028	1.7917	0.0296712	1.83971	0
100043803_at	Orai2-ps	ORAI calcium release-activated calcium modulator 2, pseudogene	-1.03327	60.7357	-1.12112	14.3309	-1.15842	16.9924
100043820_at	9030622O22Rik	RIKEN cDNA 9030622O22 gene	-1.02316	60.7357	1.30869	0.803127	1.27907	0.482549
100043826_at	Mrps36-ps1	mitichondrial ribosomal protein S36, pseudogene 1	1.42501	6.16911	1.34112	5.99507	1.91111	0.482549
100043842_at	Scgb2b11	secretoglobin, family 2B, member 11	-1.03649	60.0813	-1.01196	42.8252	-1.04888	27.3308
100043856_at	Scgb2b18	secretoglobin, family 2B, member 18	1.01538	54.2028	-1.02083	41.0315	-1.00536	36.5645
100043860_at	Scgb1b24	secretoglobin, family 1B, member 24	1.04364	42.041	-1.11456	5.99507	-1.06795	16.9924
100043861_at	Klrb1	killer cell lectin-like receptor subfamily B member 1	1.09409	42.041	1.70672	0.130668	1.8673	0
100043868_at	Scgb1b30	secretoglobin, family 1B, member 30	-1.19042	25.0856	-1.00643	43.2839	-1.19808	2.97913
100043871_at	Gm4701	predicted gene 4701	1.28436	1.50007	1.22439	2.18295	1.57256	0.111227
100043885_at	Gm4710	predicted gene 4710	1.01015	54.2028	1.11332	5.99507	1.12461	2.97913
100043886_at	Gm16391	L antigen family, member 3 pseudogene	-1.00261	60.7357	1.14008	26.6761	1.13711	16.9924
100043899_at	R3hdml	R3H domain containing-like	1.01775	54.2028	1.34313	0.803127	1.36697	2.97913
100043902_at	Six3os1	SIX homeobox 3, opposite strand 1	1.06967	42.041	1.03826	35.7106	1.11059	7.52666
100043904_at	Gm4719	predicted gene 4719	-1.10546	42.041	1.57581	0.0451547	1.42548	0.0148586
100043910_at	A630075F10Rik	RIKEN cDNA A630075F10 gene	1.14389	12.3562	-1.05906	26.6761	1.08011	7.52666
100043911_at	Ppp4r1l-ps	protein phosphatase 4, regulatory subunit 1-like, pseudogene	-1.08181	42.041	-1.1164	14.3309	-1.20773	2.97913
100043946_at	Gm14635	predicted gene 14635	-1.2235	12.3562	1.14781	14.3309	-1.06595	34.5868
100044193_at	Gm20939	predicted gene, 20939	1.37067	1.50007	-1.88579	0.0296712	-1.37582	1.13219
100044509_at	Tgfbr3l	transforming growth factor, beta receptor III-like	-1.30001	2.9847	1.03741	35.7106	-1.25313	0.224685
100044526_at	Gm17764	28S ribosomal protein S14, mitochondrial-like	1.00223	54.2028	1.19262	2.18295	1.19529	1.13219
100045469_at	Gm14204	predicted gene 14204	1.04676	42.041	-1.07986	26.6761	-1.03162	36.071
100045653_at	Gm17769	predicted gene, 17769	-1.06556	57.704	1.25864	2.18295	1.1812	7.52666
100045766_at	Gm10126	ribosomal protein S29 pseudogene	1.12044	12.3562	-1.12791	5.99507	-1.00667	36.5645
100045778_at	Rnf223	ring finger 223	1.20986	25.0856	-1.07746	35.7106	1.12289	7.52666
100045792_at	Ect2l	epithelial cell transforming sequence 2 oncogene-like	-1.03723	60.0813	1.32424	0.803127	1.2767	0.482549
100046078_at	Gm15266	predicted gene 15266	-1.07906	54.2028	1.30769	2.18295	1.21188	2.97913
100046950_at	Gm17778	predicted gene, 17778	-1.02011	60.7357	1.07303	26.6761	1.05187	16.9924
100047123_at	Gm15743	predicted gene 15743	1.0717	42.041	1.4725	0.308961	1.57808	0.224685
100047133_at	Gm16894	predicted gene, 16894	1.00822	54.2028	1.31219	0.803127	1.32298	0.482549
100047671_at	Gm17783	predicted gene, 17783	1.0195	54.2028	1.23424	14.3309	1.25831	7.52666
100048057_at	Gm9830	family with sequence similarity 103, member A1 pseudogene	1.23948	6.16911	-1.25445	14.3309	-1.01207	36.5645
100048185_at	Gm29692	predicted gene, 29692	1.20981	6.16911	1.50804	0.130668	1.82445	0.0148586
100048534_at	Cfap43	cilia and flagella associated protein 43	-1.07903	54.2028	1.10598	14.3309	1.02498	27.3308
100048658_at	Ddx43	DEAD (Asp-Glu-Ala-Asp) box polypeptide 43	1.30682	2.9847	-1.34264	0.308961	-1.02741	34.5868
100048701_at	AI847159	expressed sequence AI847159	-1.11954	42.041	-1.10071	5.99507	-1.23229	2.97913
100048895_at	9330020H09Rik	RIKEN cDNA 9330020H09 gene	1.17808	12.3562	-1.64858	0.130668	-1.39938	0.224685
100048985_at	Gm14321	predicted gene 14321	-1.24224	2.9847	1.68744	0.0451547	1.35839	0.482549
100049161_at	Gm13032	predicted gene 13032	1.08889	42.041	-1.01236	42.8252	1.0756	16.9924
100049545_at	Mir741	microRNA 741	1.07537	42.041	-1.16668	5.99507	-1.08491	7.52666
100049546_at	Mir743	microRNA 743	1.19198	42.041	1.02817	41.0315	1.22556	7.52666
100049547_at	Mir804	microRNA 804	1.05036	42.041	-1.07408	26.6761	-1.02258	36.071
100049548_at	Mir742	microRNA 742	1.18023	6.16911	-1.25215	0.803127	-1.06093	27.3308
100049549_at	Mir181d	microRNA 181d	-1.11984	42.041	1.15001	26.6761	1.02694	31.9769
100049710_at	Mir290a	microRNA 290a	-1.01706	60.7357	-1.0832	26.6761	-1.10168	31.9769
100061_at	Lrrc19	leucine rich repeat containing 19	1.09094	25.0856	1.13563	14.3309	1.23891	0.482549
100066_at	Cyp2j11	cytochrome P450, family 2, subfamily j, polypeptide 11	1.06701	42.041	-1.24797	5.99507	-1.16959	7.52666
100072_at	Camta1	calmodulin binding transcription activator 1	1.02875	54.2028	-1.14356	5.99507	-1.11161	7.52666
100073351_at	Yy2	Yy2 transcription factor	1.28712	2.9847	-1.49886	0.0451547	-1.16451	16.9924
100087_at	Kti12	KTI12 homolog, chromatin associated	1.37262	1.50007	-1.14214	5.99507	1.2018	1.13219
100088_at	Rcc1	regulator of chromosome condensation 1	1.17059	6.16911	-1.05464	26.6761	1.10994	2.97913
100090_at	Zbtb48	zinc finger and BTB domain containing 48	-1.29249	2.9847	-1.12073	14.3309	-1.44854	0.482549
100093700_at	Gm10400	predicted gene 10400	1.00003	54.2028	1.24775	0.803127	1.24779	0.482549
100101484_at	Trac	T cell receptor alpha constant	1.11722	12.3562	1.25369	0.308961	1.40065	0
100101806_at	Srp54c	signal recognition particle 54C	1.29876	1.50007	-1.17347	2.18295	1.10677	7.52666
100101919_at	Dnah7c	dynein, axonemal, heavy chain 7C	-1.1166	54.2028	1.15436	14.3309	1.03381	31.9769
100101939_at	Trav20	T cell receptor alpha variable 20	1.03021	54.2028	1.33291	2.18295	1.37318	2.97913
100101940_at	Trav21-dv12	T cell receptor alpha variable 21-DV12	-1.06445	60.0813	1.20443	14.3309	1.1315	7.52666
100101942_at	Trdv2-1	T cell receptor delta variable 2-1	1.01675	54.2028	-1.04935	35.7106	-1.03206	36.071
100102_at	Pcsk9	proprotein convertase subtilisin/kexin type 9	1.05844	42.041	1.34272	0.308961	1.42119	0.482549
100113364_at	Snora15	small nucleolar RNA, H/ACA box 15	-1.96898	0.192905	-1.52972	0.803127	-3.01198	0.0469889
100113394_at	Astx5	amplified spermatogenic transcripts X encoded 5	1.06952	42.041	-1.24767	0.803127	-1.16657	1.13219
100113398_at	Adat3	adenosine deaminase, tRNA-specific 3	1.03818	54.2028	-1.10282	35.7106	-1.06225	36.071
100113412_at	Trav13-4-dv7	T cell receptor alpha variable 13-4-DV7	1.00631	54.2028	-1.13998	35.7106	-1.13283	31.9769
100113414_at	Trav4-4-dv10	T cell receptor alpha variable 4-4-DV10	-1.01902	60.7357	1.09667	35.7106	1.0762	16.9924
100114901_at	Trdv4	T cell receptor delta variable 4	-1.01045	60.7357	-1.0718	26.6761	-1.083	27.3308
100115376_at	Trdj1	T cell receptor delta joining 1	-1.39095	2.9847	1.47674	0.803127	1.06168	16.9924
100118398_at	Trdj2	T cell receptor delta joining 2	1.22086	6.16911	-1.32091	0.803127	-1.08195	16.9924
100121_at	Tdrd7	tudor domain containing 7	1.10343	25.0856	-1.15009	5.99507	-1.04229	31.9769
100124287_at	Traj61	T cell receptor alpha joining 61	1.44753	1.50007	1.31975	2.18295	1.91038	0.0469889
100124288_at	Traj60	T cell receptor alpha joining 60	1.17453	6.16911	-1.35281	0.0451547	-1.15178	1.13219
100124293_at	Traj59	T cell receptor alpha joining 59	1.18314	12.3562	-1.3599	0.803127	-1.1494	7.52666
100124294_at	Traj58	T cell receptor alpha joining 58	-1.29106	6.16911	3.17169	0	2.45665	0
100124295_at	Traj57	T cell receptor alpha joining 57	-1.2031	12.3562	1.39	0.308961	1.15534	7.52666
100124296_at	Traj56	T cell receptor alpha joining 56	1.11728	25.0856	-1.04268	35.7106	1.07155	2.97913
100124297_at	Traj55	T cell receptor alpha joining 55	1.22886	25.0856	-1.73675	0.130668	-1.4133	7.52666
100124333_at	Traj54	T cell receptor alpha joining 54	1.14241	42.041	1.01288	42.8252	1.15713	16.9924
100124335_at	Traj53	T cell receptor alpha joining 53	-1.00478	60.7357	1.26916	2.18295	1.26313	2.97913
100124336_at	Traj52	T cell receptor alpha joining 52	1.32588	0.748121	1.02867	35.7106	1.36389	0.482549
100124337_at	Traj51	T cell receptor alpha joining 51	1.10054	25.0856	-1.01587	41.0315	1.08334	16.9924
100124338_at	Traj50	T cell receptor alpha joining 50	1.1934	25.0856	1.0464	35.7106	1.24877	7.52666
100124339_at	Traj49	T cell receptor alpha joining 49	1.08965	42.041	-1.19858	14.3309	-1.09998	16.9924
100124340_at	Traj48	T cell receptor alpha joining 48	1.05194	42.041	1.17061	5.99507	1.2314	1.13219
100124342_at	Traj46	T cell receptor alpha joining 46	-1.04064	60.7357	1.10128	35.7106	1.05827	31.9769
100124343_at	Traj45	T cell receptor alpha joining 45	-1.18782	12.3562	1.00291	42.8252	-1.18437	7.52666
100124344_at	Traj44	T cell receptor alpha joining 44	1.15464	25.0856	1.37769	2.18295	1.59074	0.482549
100124345_at	Traj43	T cell receptor alpha joining 43	-1.04647	60.7357	1.25281	5.99507	1.19717	7.52666
100124346_at	Traj42	T cell receptor alpha joining 42	1.24268	1.50007	-1.26394	0.803127	-1.0171	36.5645
100124347_at	Traj41	T cell receptor alpha joining 41	1.15642	12.3562	-1.04578	26.6761	1.1058	7.52666
100124348_at	Traj40	T cell receptor alpha joining 40	-1.06952	54.2028	1.16438	14.3309	1.08869	16.9924
100124349_at	Traj39	T cell receptor alpha joining 39	1.03819	54.2028	1.20263	5.99507	1.24856	1.13219
100124351_at	Traj38	T cell receptor alpha joining 38	1.18309	12.3562	2.2318	0.0451547	2.64042	0
100124352_at	Traj37	T cell receptor alpha joining 37	1.58576	0.301356	-1.64925	0.0451547	-1.04003	34.5868
100124353_at	Traj36	T cell receptor alpha joining 36	1.23682	2.9847	1.13951	14.3309	1.40937	0.224685
100124354_at	Traj35	T cell receptor alpha joining 35	1.00189	54.2028	1.23303	5.99507	1.23536	2.97913
100124355_at	Traj34	T cell receptor alpha joining 34	1.05031	42.041	-1.10897	14.3309	-1.05585	27.3308
100124356_at	Traj33	T cell receptor alpha joining 33	1.13696	25.0856	-1.08014	26.6761	1.05261	27.3308
100124357_at	Traj32	T cell receptor alpha joining 32	1.11387	42.041	-1.21265	14.3309	-1.08868	34.5868
100124358_at	Traj31	T cell receptor alpha joining 31	1.06048	42.041	-1.24321	0.308961	-1.17231	1.13219
100124359_at	Traj30	T cell receptor alpha joining 30	1.127	25.0856	-1.08804	26.6761	1.03581	31.9769
100124360_at	Traj29	T cell receptor alpha joining 29	1.09582	42.041	-1.17295	5.99507	-1.07038	27.3308
100124361_at	Traj28	T cell receptor alpha joining 28	1.21582	12.3562	1.28786	0.803127	1.5658	0.482549
100124362_at	Traj27	T cell receptor alpha joining 27	-1.17288	25.0856	1.7191	0.0296712	1.46571	0.111227
100124363_at	Traj26	T cell receptor alpha joining 26	-1.04287	57.704	-1.02608	41.0315	-1.07007	31.9769
100124364_at	Traj25	T cell receptor alpha joining 25	-1.03997	60.7357	-1.44118	0.308961	-1.49878	0.111227
100124365_at	Traj24	T cell receptor alpha joining 24	-1.14639	42.041	-1.32527	2.18295	-1.51928	0.482549
100124366_at	Traj23	T cell receptor alpha joining 23	1.05814	42.041	-1.10421	26.6761	-1.04353	36.071
100124367_at	Traj22	T cell receptor alpha joining 22	-1.04707	60.7357	1.02143	41.0315	-1.0251	36.5645
100124368_at	Traj21	T cell receptor alpha joining 21	-1.00542	60.7357	1.49171	0.803127	1.48366	0.482549
100124369_at	Traj20	T cell receptor alpha joining 20	1.03133	54.2028	1.41242	2.18295	1.45667	1.13219
100124370_at	Traj19	T cell receptor alpha joining 19	1.09086	25.0856	-1.24537	0.803127	-1.14164	1.13219
100124371_at	Traj18	T cell receptor alpha joining 18	1.18073	25.0856	-1.07535	26.6761	1.09799	16.9924
100124372_at	Traj17	T cell receptor alpha joining 17	1.14058	12.3562	1.0478	26.6761	1.1951	2.97913
100124387_at	Traj16	T cell receptor alpha joining 16	-1.14338	42.041	1.03823	35.7106	-1.10128	2.97913
100124388_at	Traj15	T cell receptor alpha joining 15	1.02819	54.2028	1.31209	0.803127	1.34907	0.224685
100124390_at	Traj13	T cell receptor alpha joining 13	1.04883	54.2028	-1.41845	5.99507	-1.35241	0.482549
100124391_at	Traj12	T cell receptor alpha joining 12	-1.09423	54.2028	1.38942	0.803127	1.26977	1.13219
100124392_at	Traj11	T cell receptor alpha joining 11	1.07483	42.041	1.23066	2.18295	1.32275	0.482549
100124393_at	Traj9	T cell receptor alpha joining 9	1.25043	12.3562	-1.27237	5.99507	-1.01755	36.5645
100124395_at	Traj8	T cell receptor alpha joining 8	1.2222	6.16911	-1.50237	0.0451547	-1.22923	2.97913
100124396_at	Traj7	T cell receptor alpha joining 7	-1.13686	54.2028	1.03797	35.7106	-1.09527	31.9769
100124397_at	Traj6	T cell receptor alpha joining 6	-1.31847	6.16911	1.29371	2.18295	-1.01914	36.5645
100124398_at	Traj4	T cell receptor alpha joining 4	1.16758	12.3562	-1.25401	0.803127	-1.07402	16.9924
100124399_at	Traj3	T cell receptor alpha joining 3	1.02848	54.2028	-1.13558	5.99507	-1.10414	2.97913
100124431_at	Mir18b	microRNA 18b	1.06823	42.041	1.19863	5.99507	1.28041	0.482549
100124432_at	Mir193b	microRNA 193b	1.03347	54.2028	1.01278	42.8252	1.04667	27.3308
100124433_at	Mir208b	microRNA 208b	1.07511	25.0856	-1.28644	0.130668	-1.19656	0.482549
100124435_at	Mir297a-4	microRNA 297a-4	-1.21292	42.041	5.23841	0	4.31883	0
100124437_at	Mir327	microRNA 327	-1.05463	60.0813	-1.1678	14.3309	-1.23159	0.482549
100124438_at	Mir343	microRNA 343	-1.07057	60.0813	2.02619	0.130668	1.89263	0
100124439_at	Mir344-2	microRNA 344-2	1.12589	25.0856	-1.31186	0.130668	-1.16517	2.97913
100124442_at	Mir466b-2	microRNA 466b-2	1.00243	54.2028	-1.13609	14.3309	-1.13333	16.9924
100124446_at	Mir466h	microRNA 466h	-1.98586	0.192905	2.24037	0.308961	1.12816	27.3308
100124447_at	Mir467d	microRNA 467d	-1.17205	12.3562	-1.08253	26.6761	-1.26877	1.13219
100124448_at	Mir467e	microRNA 467e	-1.63144	0.748121	4.52989	0	2.77661	0
100124449_at	Mir509	microRNA 509	1.0749	42.041	-1.1425	14.3309	-1.06288	16.9924
100124450_at	Mir544	microRNA 544	1.03749	54.2028	-1.20214	2.18295	-1.15871	2.97913
100124451_at	Mir574	microRNA 574	1.03687	54.2028	2.26013	0	2.34346	0
100124452_at	Mir598	microRNA 598	1.02632	54.2028	1.26519	5.99507	1.29849	2.97913
100124453_at	Mir654	microRNA 654	1.01801	54.2028	1.14738	14.3309	1.16804	2.97913
100124456_at	Mir872	microRNA 872	1.20451	12.3562	-1.00673	43.2839	1.19646	2.97913
100124457_at	Mir873a	microRNA 873a	1.14944	12.3562	-1.31583	0.130668	-1.14476	1.13219
100124458_at	Mir876	microRNA 876	1.05459	42.041	-1.12368	5.99507	-1.06552	27.3308
100124459_at	Mir877	microRNA 877	1.01995	54.2028	-1.16946	5.99507	-1.14659	7.52666
100124460_at	Mir881	microRNA 881	1.06829	25.0856	-1.04549	35.7106	1.02182	31.9769
100124461_at	Mir882	microRNA 882	-1.03992	60.0813	-1.12868	5.99507	-1.17374	2.97913
100124462_at	Mir883a	microRNA 883a	-1.01491	60.7357	-1.02101	41.0315	-1.03623	36.071
100124463_at	Mir105	microRNA 105	-1.01474	60.7357	-1.09944	26.6761	-1.11565	7.52666
100124465_at	Mir466d	microRNA 466d	-2.05281	0.104308	2.66862	0.0201689	1.29998	2.97913
100124466_at	Mir493	microRNA 493	1.31053	1.50007	-1.41312	0.0451547	-1.07828	16.9924
100124468_at	Mir653	microRNA 653	1.05391	42.041	1.00052	42.8252	1.05446	16.9924
100124469_at	Mir875	microRNA 875	1.06893	42.041	-1.20641	0.803127	-1.12861	0.482549
100124470_at	Mir92b	microRNA 92b	1.42258	0.748121	-1.10452	14.3309	1.28797	0.224685
100124476_at	Mir504	microRNA 504	1.03531	54.2028	-1.10935	14.3309	-1.07151	27.3308
100124478_at	Mir871	microRNA 871	1.2074	12.3562	-1.24606	2.18295	-1.03202	34.5868
100124479_at	Mir878	microRNA 878	1.13072	25.0856	-1.18738	5.99507	-1.05011	27.3308
100124480_at	Mir880	microRNA 880	1.08464	25.0856	-1.21722	2.18295	-1.12223	1.13219
100124481_at	Mir190b	microRNA 190b	1.00198	54.2028	-1.11576	5.99507	-1.11356	7.52666
100124484_at	Mir453	microRNA 453	1.25597	12.3562	1.0751	35.7106	1.3503	2.97913
100124487_at	Mir467c	microRNA 467c	-1.37268	2.9847	1.79308	0.0201689	1.30626	0.482549
100124488_at	Mir511	microRNA 511	1.10769	25.0856	-1.15442	5.99507	-1.04219	36.071
100124489_at	Mir582	microRNA 582	-1.07446	54.2028	-1.11668	14.3309	-1.19983	2.97913
100124491_at	Mir874	microRNA 874	-1.07132	54.2028	1.47839	0.130668	1.37997	0.111227
100124492_at	Mir879	microRNA 879	1.0421	42.041	-1.02381	41.0315	1.01786	31.9769
100124493_at	Mir883b	microRNA 883b	1.13256	25.0856	-1.15809	14.3309	-1.02254	36.071
100124494_at	Mir421	microRNA 421	-1.86125	0	-1.60981	0	-2.99627	0
100124495_at	Mir466g	microRNA 466g	-1.08214	54.2028	1.03004	35.7106	-1.05058	31.9769
100124496_at	Mir743b	microRNA 743b	1.04259	54.2028	1.04887	35.7106	1.09354	7.52666
100124623_at	Gm13179	predicted gene 13179	-1.26259	25.0856	-1.14133	26.6761	-1.44103	7.52666
100124659_at	Trbv2	T cell receptor beta, variable 2	-1.07242	54.2028	1.78988	0	1.669	0
100124660_at	Trbv4	T cell receptor beta, variable 10	1.04093	42.041	1.24043	2.18295	1.29121	0.482549
100124661_at	Trbv5	T cell receptor beta, variable 5	1.00036	54.2028	-1.09614	26.6761	-1.09575	16.9924
100124670_at	Trbv10	T cell receptor beta variable 10	1.04314	54.2028	-1.06298	35.7106	-1.01901	34.5868
100124672_at	Trbv12-1	T cell receptor beta, variable 12-1	1.2393	12.3562	-1.03651	41.0315	1.19564	7.52666
100124673_at	Trbv13-1	T cell receptor beta, variable 13-1	-1.01734	60.7357	1.37921	0.130668	1.3557	0.0469889
100124674_at	Trbv12-2	T cell receptor beta, variable 12-2	-1.01038	60.7357	1.37193	0.308961	1.35784	0.482549
100124675_at	Trbv13-2	T cell receptor beta, variable 13-2	-1.13641	54.2028	1.15766	14.3309	1.0187	27.3308
100124677_at	Trbv13-3	T cell receptor beta, variable 13-3	1.18741	12.3562	1.35947	0.803127	1.61425	0.0469889
100124678_at	Trbv14	T cell receptor beta, variable 14	1.07715	42.041	-1.04698	35.7106	1.02882	27.3308
100124679_at	Trbv15	T cell receptor beta, variable 15	-1.07215	57.704	1.05224	35.7106	-1.01892	36.5645
100124680_at	Trbv16	T cell receptor beta, variable 16	-1.05359	60.0813	1.8663	0.0451547	1.77137	0.0148586
100124681_at	Trbv17	T cell receptor beta, variable 17	-1.01839	60.7357	1.36633	2.18295	1.34165	1.13219
100124684_at	Trbv19	T cell receptor beta, variable 19	-1.04194	60.7357	1.21928	2.18295	1.17021	7.52666
100124685_at	Trbv20	T cell receptor beta, variable 20	-1.02843	60.7357	1.67813	0.803127	1.63174	1.13219
100124686_at	Trbv21	T cell receptor beta, variable 21	-1.13463	25.0856	1.12565	14.3309	-1.00798	36.5645
100124688_at	Trbv23	T cell receptor beta, variable V23	1.12152	25.0856	-1.13182	5.99507	-1.00919	36.5645
100124698_at	Trbv29	T cell receptor beta, variable 29	-1.13147	54.2028	1.3929	2.18295	1.23105	7.52666
100124699_at	Trbv30	T cell receptor beta, variable 30	-1.0217	60.7357	1.17079	5.99507	1.14591	7.52666
100125248_at	Trbj1-1	T cell receptor beta joining 1-1	-2.17897	0.0881706	1.71299	0.130668	-1.27203	1.13219
100125249_at	Trbj1-2	T cell receptor beta joining 1-2	-1.50134	0.748121	1.89966	0.0451547	1.26531	2.97913
100125250_at	Trbj1-3	T cell receptor beta joining 1-3	-1.11441	25.0856	1.11168	5.99507	-1.00246	36.5645
100125251_at	Trbj1-4	T cell receptor beta joining 1-4	-1.1152	54.2028	1.01682	41.0315	-1.09675	31.9769
100125252_at	Trbj1-5	T cell receptor beta joining 1-5	-1.16882	25.0856	-1.0463	41.0315	-1.22294	7.52666
100125253_at	Trbj1-6	T cell receptor beta joining 1-6	-1.20072	25.0856	1.7819	0.0296712	1.48403	0.224685
100125254_at	Trbj1-7	T cell receptor beta joining 1-7	-1.42476	6.16911	1.58732	0.130668	1.1141	27.3308
100125255_at	Trbj2-1	T cell receptor beta joining 2-1	1.23283	12.3562	-1.22932	2.18295	1.00286	31.9769
100125256_at	Trbj2-2	T cell receptor beta joining 2-2	-1.21824	25.0856	1.31079	5.99507	1.07597	27.3308
100125257_at	Trbj2-3	T cell receptor beta joining 2-3	-1.26956	12.3562	2.09132	0.130668	1.64729	0.482549
100125258_at	Trbj2-4	T cell receptor beta joining 2-4	1.17344	12.3562	-1.55496	0.308961	-1.32513	1.13219
100125259_at	Trbj2-5	T cell receptor beta joining 2-5	1.05821	42.041	1.12001	5.99507	1.1852	1.13219
100125260_at	Trbj2-6	T cell receptor beta joining 2-6	-1.18148	25.0856	1.92203	0.0451547	1.6268	0.224685
100125261_at	Trbj2-7	T cell receptor beta joining 2-7	1.3029	6.16911	-1.10368	26.6761	1.18051	16.9924
100125262_at	Trbc1	T cell receptor beta, constant region 1	-1.47569	0.301356	1.31763	0.130668	-1.11996	7.52666
100125263_at	Trbc2	T cell receptor beta, constant 2	1.02747	54.2028	1.27359	2.18295	1.30858	2.97913
100125339_at	A230020J21Rik	RIKEN cDNA A230020J21 gene	1.01691	54.2028	-1.09813	26.6761	-1.07987	27.3308
100125586_at	Vmn2r2	vomeronasal 2, receptor 2	-1.10234	54.2028	-1.02027	42.8252	-1.12469	16.9924
100125594_at	LOC100125594	uncharacterized LOC100125594	1.19822	12.3562	1.37264	2.18295	1.64472	0.482549
100125929_at	0610009E02Rik	RIKEN cDNA 0610009E02 gene	-1.11217	42.041	1.24965	5.99507	1.12361	16.9924
100125931_at	Phtf1os	putative homeodomain transcription factor 1, opposite strand	-1.33122	1.50007	-1.18497	2.18295	-1.57745	0
100126034_at	Gm10644	predicted gene 10644	-1.24175	12.3562	1.75849	0.0451547	1.41613	0.482549
100126203_at	6820426E19Rik	RIKEN cDNA 6820426E19 gene	-1.01487	60.7357	1.41613	0.803127	1.39538	0.482549
100126224_at	Gm11747	predicted gene 11747	1.01255	54.2028	1.07963	26.6761	1.09318	16.9924
100126226_at	Krt83	keratin 83	-1.06528	57.704	1.65161	0.130668	1.5504	0.482549
100126227_at	Gm13031	predicted gene 13031	-1.02169	60.7357	1.14093	5.99507	1.11671	2.97913
100126229_at	Gm12758	predicted gene 12758	-1.01345	60.7357	1.0429	35.7106	1.02906	31.9769
100126242_at	Frs3os	fibroblast growth factor receptor substrate 3, opposite strand	1.03807	54.2028	-1.05069	35.7106	-1.01215	36.5645
100126243_at	A030001D20Rik	RIKEN cDNA A030001D20 gene	-1.02191	60.7357	-1.04029	35.7106	-1.06309	27.3308
100126244_at	Gm13262	predicted gene 13262	1.01832	54.2028	1.31059	2.18295	1.3346	1.13219
100126269_at	BC048602	cDNA sequence BC048602	-1.06288	60.0813	1.246	14.3309	1.17228	16.9924
100126431_at	Trgj1	T cell receptor gamma joining 1	3.68015	0	-3.71798	0	-1.01028	36.5645
100126432_at	Trgj3	T cell receptor gamma joining 3	1.10687	42.041	-1.26418	5.99507	-1.14212	7.52666
100126433_at	Trgj2	T cell receptor gamma joining 2	1.34249	2.9847	-1.03108	41.0315	1.30201	0.482549
100126434_at	Trgj4	T cell receptor gamma joining 4	-1.02541	60.7357	-1.22634	14.3309	-1.2575	31.9769
100126458_at	Trav8n-2	T cell receptor alpha variable 8n-2	1.02819	54.2028	1.25312	2.18295	1.28845	0.482549
100126459_at	Trav16n	T cell receptor alpha variable 16n	1.98233	0.0546658	-1.98626	0.0296712	-1.00198	36.5645
100126460_at	Trav13n-4	T cell receptor alpha variable 13N-4	-1.51683	0.748121	1.67553	0.308961	1.10462	16.9924
100126462_at	Trav4-2	T cell receptor alpha variable 4-2	1.1161	25.0856	-1.2116	5.99507	-1.08557	7.52666
100126463_at	Trav6-4	T cell receptor alpha variable 6-4	1.25215	12.3562	-1.63678	0.130668	-1.30717	7.52666
100126469_at	Trav13-1	T cell receptor alpha variable 13-1	-1.20642	12.3562	2.81679	0	2.33483	0.0469889
100126471_at	Trav4-3	T cell receptor alpha variable 4-3	1.01445	54.2028	-1.05718	41.0315	-1.04212	36.071
100126692_at	B020018J22Rik	Riken cDNA B020018J22 gene	-1.05196	57.704	1.06419	26.6761	1.01163	31.9769
100126765_at	Esp36	exocrine gland secreted peptide 36	1.02428	54.2028	1.27879	5.99507	1.30983	2.97913
100126766_at	Esp3	exocrine gland secreted peptide 3	1.27426	2.9847	-1.11316	14.3309	1.14473	7.52666
100126768_at	Esp31	exocrine gland secreted peptide 31	1.24224	2.9847	-1.32881	0.130668	-1.06969	27.3308
100126773_at	Esp34	exocrine gland secreted peptide 34	-1.02628	60.7357	1.06437	26.6761	1.03711	27.3308
100126774_at	Esp18	exocrine gland secreted peptide 18	-1.04906	57.704	1.29277	2.18295	1.23232	2.97913
100126775_at	Esp38	exocrine gland secreted peptide 38	1.05774	42.041	1.087	14.3309	1.14976	2.97913
100126776_at	Esp24	exocrine gland secreted peptide 24	1.07952	42.041	-1.24683	2.18295	-1.15499	7.52666
100126777_at	Esp4	exocrine gland secreted peptide 4	1.11688	12.3562	1.02099	41.0315	1.14032	7.52666
100126778_at	Esp8	exocrine gland secreted peptide 8	-1.04678	57.704	1.02191	35.7106	-1.02434	36.071
100126779_at	Esp23	exocrine gland secreted peptide 23	-1.04389	57.704	1.08799	14.3309	1.04225	27.3308
100126795_at	Gm10575	predicted gene 10575	1.04056	54.2028	1.10173	14.3309	1.14642	7.52666
100126824_at	Sco2	SCO2 cytochrome c oxidase assembly protein	1.32259	2.9847	-1.68083	2.18295	-1.27087	27.3308
100127111_at	Snord22	small nucleolar RNA, C/D box 22	-1.78305	0.104308	-2.23241	0.0201689	-3.98051	0
100127433_at	Gm11532	predicted gene 11532	1.04973	42.041	1.08673	26.6761	1.14078	7.52666
100129_at	Gpr153	G protein-coupled receptor 153	-1.01293	60.7357	1.21	5.99507	1.19456	0.482549
100134990_at	Selenok-ps1	selenoprotein K, pseudogene 1	-1.03362	60.7357	1.32601	0.803127	1.28289	1.13219
100135654_at	Rhox3c	reproductive homeobox 3C	1.12893	25.0856	-1.06342	26.6761	1.06161	27.3308
100141474_at	4933428G20Rik	RIKEN cDNA 4933428G20 gene	1.00965	54.2028	1.50253	0.308961	1.51703	0.224685
100151772_at	Srsx	serine-rich, secreted, X-linked	1.16879	42.041	2.14924	0.308961	2.51202	0.224685
100155_at	AI481877	expressed sequence AI481877	1.173	12.3562	1.0874	14.3309	1.27552	0.482549
100163_at	Pafah2	platelet-activating factor acetylhydrolase 2	-1.16867	12.3562	-1.13294	2.18295	-1.32403	0.224685
100165_at	AI507597	expressed sequence AI507597	-1.22322	12.3562	1.54444	0.130668	1.26261	1.13219
100169_at	Phactr4	phosphatase and actin regulator 4	-1.06006	54.2028	1.13864	5.99507	1.07413	7.52666
100169864_at	Gm44504	predicted readthrough transcript (NMD candidate), 44504	-1.50228	1.50007	1.65737	0.308961	1.10324	16.9924
100169865_at	Gm10914	predicted gene 10914	-1.49474	0.748121	1.10217	26.6761	-1.35617	0.482549
100169874_at	Gm11110	predicted gene 11110	1.41851	1.50007	-1.34812	0.803127	1.05222	27.3308
100169878_at	Gm10941	predicted gene 10941	-1.00955	60.7357	1.00955	41.0315	1	31.9769
100169889_at	Peg3os	Peg3 opposite strand	-1.11815	42.041	1.12955	14.3309	1.01019	31.9769
100170401_at	EU599041	expressed sequence EU599041	-1.01148	60.7357	-1.1379	5.99507	-1.15096	2.97913
100174921_at	4930505N22Rik	RIKEN cDNA 4930505N22 gene	-1.056	57.704	1.09672	14.3309	1.03856	16.9924
100177_at	Zmym6	zinc finger, MYM-type 6	-1.07545	42.041	-1.15394	2.18295	-1.24101	0.111227
100182_at	Akna	AT-hook transcription factor	-2.03531	0	1.6805	0.0201689	-1.21113	0.482549
100190765_at	Mir449b	microRNA 449b	-1.20553	12.3562	1.24612	2.18295	1.03367	31.9769
100191037_at	Krtap10-4	keratin associated protein 10-4	-1.18747	12.3562	1.3057	0.803127	1.09957	7.52666
100198_at	H6pd	hexose-6-phosphate dehydrogenase (glucose 1-dehydrogenase)	-1.8764	0.0546658	1.42583	0.0451547	-1.31601	0.111227
100201_at	Tmem64	transmembrane protein 64	-1.28733	2.9847	-1.15725	2.18295	-1.48977	0.111227
100206_at	Adprhl2	ADP-ribosylhydrolase like 2	1.03236	54.2028	-1.2591	0.803127	-1.21963	0.482549
100210_at	Gpn2	GPN-loop GTPase 2	1.01977	54.2028	1.08594	14.3309	1.10742	7.52666
100213_at	Rusc2	RUN and SH3 domain containing 2	1.19544	2.9847	1.09942	14.3309	1.31429	0.224685
100216455_at	Gm14124	predicted gene 14124	1.13252	25.0856	-1.2345	5.99507	-1.09005	16.9924
100216474_at	Ttll2	tubulin tyrosine ligase-like family, member 2	1.32	12.3562	-1.20594	26.6761	1.09458	16.9924
100216530_at	Snord118	small nucleolar RNA, C/D box 118	1.1353	42.041	-1.9208	0.0201689	-1.69189	0.482549
100216531_at	Snord1b	small nucleolar RNA, C/D box 1B	-2.61439	0.0881706	-1.94628	0.0451547	-5.08834	0
100216532_at	Snord2	small nucleolar RNA, C/D box 2	1.08599	42.041	-1.99832	0	-1.8401	0
100216533_at	Snord55	small nucleolar RNA, C/D box 55	-1.66584	0.301356	-1.73475	0.0451547	-2.88982	0
100216534_at	Snord96a	small nucleolar RNA, C/D box 96A	1.27751	12.3562	-1.35236	0.803127	-1.05859	34.5868
100216535_at	Scarna9	small Cajal body-specific RNA 9	-1.87198	0.0881706	1.2097	5.99507	-1.54747	0
100216537_at	Snord104	small nucleolar RNA, C/D box 104	-1.47436	1.50007	1.45675	0.130668	-1.01209	36.5645
100216539_at	Snord4a	small nucleolar RNA, C/D box 4A	1.11585	25.0856	-1.27681	2.18295	-1.14424	27.3308
100216540_at	Snord95	small nucleolar RNA, C/D box 95	-1.20435	12.3562	-1.19227	0.803127	-1.43591	0.224685
100217413_at	Scarna10	small Cajal body-specific RNA 10	-1.92031	0.301356	-1.36381	5.99507	-2.61894	0.0469889
100217414_at	Scarna3a	small Cajal body-specific RNA 3A	-1.01911	60.7357	-1.63632	0.308961	-1.66759	0.482549
100217415_at	Scarna6	small Cajal body-specific RNA 6	-1.24394	6.16911	-1.60452	0.308961	-1.99592	0.111227
100217416_at	Snora2b	small nucleolar RNA, H/ACA box 2B	-1.3252	12.3562	-1.15113	26.6761	-1.52548	0.224685
100217417_at	Snora34	small nucleolar RNA, H/ACA box 34	-2.57085	0	-1.10538	26.6761	-2.84176	0
100217418_at	Snora44	small nucleolar RNA, H/ACA box 44	-1.57276	0.192905	1.53757	0.130668	-1.02289	36.5645
100217419_at	Snora52	small nucleolar RNA, H/ACA box 52	-1.29131	1.50007	-1.02728	41.0315	-1.32654	0.482549
100217420_at	Snora81	small nucleolar RNA, H/ACA box 81	-1.54172	0.301356	-1.6919	0.0296712	-2.60844	0
100217421_at	Snord11	small nucleolar RNA, C/D box 11	-1.8534	0.301356	1.12652	14.3309	-1.64525	0.482549
100217422_at	Snord13	small nucleolar RNA, C/D box 13	1.38848	0.748121	-2.01775	0.0201689	-1.45321	0.482549
100217423_at	Snord19	small nucleolar RNA, C/D box 19	1.03813	54.2028	-2.08403	0.0201689	-2.00749	0.0469889
100217424_at	Snord38a	small nucleolar RNA, C/D box 38A	-1.02633	60.7357	-1.0645	35.7106	-1.09252	31.9769
100217426_at	Snord49b	small nucleolar RNA, C/D box 49B	-1.31206	6.16911	-1.67261	0.0451547	-2.19457	0.0148586
100217427_at	Snord52	small nucleolar RNA, C/D box 52	1.00792	54.2028	-1.32535	0.803127	-1.31493	1.13219
100217428_at	Snord57	small nucleolar RNA, C/D box 57	-1.85313	0.0881706	-1.3232	2.18295	-2.45206	0
100217429_at	Snord64	small nucleolar RNA, C/D box 64	1.0667	42.041	-1.26038	0.308961	-1.18156	1.13219
100217430_at	Snord66	small nucleolar RNA, C/D box 66	-2.08915	0.104308	-1.08398	26.6761	-2.2646	0.0469889
100217431_at	Snord69	small nucleolar RNA, C/D box 69	-1.96994	0.301356	-1.58189	0.0201689	-3.11624	0
100217432_at	Snord71	small nucleolar RNA, C/D box 71	-1.62476	0.104308	1.45611	0.130668	-1.11582	2.97913
100217433_at	Snord88a	small nucleolar RNA, C/D box 88A	-1.38898	12.3562	1.2921	14.3309	-1.07499	31.9769
100217434_at	Snord88c	small nucleolar RNA, C/D box 88C	1.02287	54.2028	1.58562	0.308961	1.62188	0.111227
100217435_at	Snord90	small nucleolar RNA, C/D box 90	-1.34399	1.50007	1.12192	14.3309	-1.19794	0.224685
100217437_at	Snord99	small nucleolar RNA, C/D box 99	-2.56652	0	1.69804	0.0296712	-1.51146	0.482549
100217438_at	Scarna2	small Cajal body-specific RNA 2	-1.07582	54.2028	1.0526	26.6761	-1.02207	36.5645
100217440_at	Snora61	small nucleolar RNA, H/ACA box 61	1.45175	0.748121	-1.19792	5.99507	1.21189	1.13219
100217441_at	Snord23	small nucleolar RNA, C/D box 23	1.01719	54.2028	-1.03801	35.7106	-1.02047	36.5645
100217442_at	Snora30	small nucleolar RNA, H/ACA box 30	-2.15391	0.104308	1.78615	0.308961	-1.20589	7.52666
100217443_at	Snord12	small nucleolar RNA, C/D box 12	-1.03238	60.7357	1.30633	5.99507	1.26536	1.13219
100217444_at	Snord65	small nucleolar RNA, C/D box 65	-1.29414	6.16911	-2.3408	0	-3.02932	0
100217445_at	Snord8	small nucleolar RNA, C/D box 8	-1.68782	0.192905	1.40874	0.0451547	-1.1981	7.52666
100217446_at	Snord47	small nucleolar RNA, C/D box 47	1.01829	54.2028	-1.19892	2.18295	-1.17738	2.97913
100217447_at	Scarna3b	small Cajal body-specific RNA 3B	-1.23798	25.0856	-1.2472	14.3309	-1.54401	2.97913
100217448_at	Scarna8	small Cajal body-specific RNA 8	-1.15738	42.041	-1.0492	35.7106	-1.21433	16.9924
100217449_at	Snora36b	small nucleolar RNA, H/ACA box 36B	-2.20449	0.0881706	-2.00572	0.0296712	-4.42159	0
100217450_at	Snora47	small nucleolar RNA, H/ACA box 47	-1.11871	54.2028	-1.27583	5.99507	-1.42728	2.97913
100217451_at	Snora7a	small nucleolar RNA, H/ACA box 7A	-1.05939	54.2028	1.00234	42.8252	-1.05692	31.9769
100217452_at	Snord110	small nucleolar RNA, C/D box 110	-1.45529	1.50007	1.12933	26.6761	-1.28863	1.13219
100217453_at	Snord16a	small nucleolar RNA, C/D box 16A	-1.46515	2.9847	-2.2294	0.0451547	-3.26641	0.0469889
100217454_at	Snord37	small nucleolar RNA, C/D box 37	1.22804	6.16911	-2.37484	0	-1.93384	0
100217455_at	Snord49a	small nucleolar RNA, C/D box 49A	-1.98097	0.748121	-2.20805	0.0296712	-4.37408	0.0148586
100217456_at	Snord53	small nucleolar RNA, C/D box 53	-1.30323	2.9847	1.10075	14.3309	-1.18395	2.97913
100217458_at	Snord67	small nucleolar RNA, C/D box 67	-1.22281	12.3562	1.18927	5.99507	-1.0282	36.071
100217459_at	Snord70	small nucleolar RNA, C/D box 70	-2.12003	0.0546658	-1.34616	0.803127	-2.85389	0
100217460_at	Snord85	small nucleolar RNA, C/D box 85	-1.05525	60.0813	-1.46803	0.130668	-1.54913	0.224685
100217461_at	Snord89	small nucleolar RNA, C/D box 89	-1.48706	0.301356	1.22056	2.18295	-1.21834	2.97913
100217462_at	Snord92	small nucleolar RNA, C/D box 92	1.32025	25.0856	-2.07214	0.0201689	-1.56951	7.52666
100217464_at	Snora41	small nucleolar RNA, H/ACA box 41	1.05651	42.041	-1.1622	5.99507	-1.10003	7.52666
100217465_at	Snord111	small nucleolar RNA, C/D box 111	-1.72872	0.192905	1.80913	0.308961	1.04651	31.9769
100217467_at	Snora5c	small nucleolar RNA, H/ACA box 5C	-1.65504	0.192905	1.06436	26.6761	-1.55497	0.224685
100217468_at	Snord45b	small nucleolar RNA, C/D box 45B	1.14264	25.0856	-3.3315	0	-2.91563	0
100217469_at	Snord91a	small nucleolar RNA, C/D box 91A	-1.25944	6.16911	-1.09434	26.6761	-1.37826	2.97913
100226_at	Stx12	syntaxin 12	1.36579	0.301356	1.1368	14.3309	1.55264	0.111227
100233175_at	Gon7	GON7, KEOPS complex subunit homolog	1.18365	12.3562	-1.6653	0.308961	-1.40692	2.97913
100233207_at	Gm17359	predicted gene, 17359	1.0563	42.041	-1.07346	26.6761	-1.01625	36.5645
100233208_at	Gm10778	predicted gene 10778	1.10214	42.041	-1.32016	5.99507	-1.19781	2.97913
100270707_at	Gm14379	predicted gene 14379	1.03119	54.2028	1.04953	35.7106	1.08227	27.3308
100270744_at	Btbd18	BTB (POZ) domain containing 18	1.00842	54.2028	1.3071	2.18295	1.31811	1.13219
100271704_at	Gm17660	predicted gene, 17660	1.08553	25.0856	1.02988	35.7106	1.11797	7.52666
100271841_at	Uckl1os	uridine-cytidine kinase 1-like 1, opposite strand	-1.07819	42.041	-1.10664	5.99507	-1.19316	0.482549
100271882_at	Gm14139	predicted gene 14139	1.01737	54.2028	-1.0785	14.3309	-1.06009	31.9769
100271928_at	Gm15881	predicted gene 15881	-1.01968	60.7357	1.43593	0.803127	1.40822	0.482549
100272219_at	AA543186	expressed sequence AA543186	1.04994	42.041	1.27183	2.18295	1.33535	0.482549
100272221_at	Gm17801	predicted gene, 17801	-1.02003	60.7357	1.37322	2.18295	1.34626	1.13219
100273_at	Osbpl9	oxysterol binding protein-like 9	-1.18275	6.16911	1.58153	0	1.33717	0.0148586
100286843_at	Gm16325	predicted gene 16325	-1.04154	60.0813	1.1326	14.3309	1.08743	16.9924
100294583_at	Alkal2	ALK and LTK ligand 2	1.08576	25.0856	1.0197	41.0315	1.10715	1.13219
100302498_at	Snora21	small nucleolar RNA, H/ACA box 21	-1.27779	2.9847	-1.20317	0.803127	-1.5374	0.0148586
100302499_at	Snora3	small nucleolar RNA, H/ACA box 3	-1.14114	12.3562	1.17377	5.99507	1.0286	31.9769
100302529_at	Snord72	small nucleolar RNA, C/D box 72	-1.34777	6.16911	-1.49505	2.18295	-2.01498	0.482549
100302565_at	Snord68	small nucleolar RNA, C/D box 68	-1.65769	0.748121	-1.808	0.308961	-2.99711	0.0469889
100302567_at	AF357399	snoRNA AF357399	-2.49419	0.192905	-2.00781	0.0201689	-5.00786	0
100302592_at	Snord14a	small nucleolar RNA, C/D box 14A	-1.03992	60.0813	-2.75949	0	-2.86965	0
100302594_at	Snord14e	small nucleolar RNA, C/D box 14E	1.65202	0.104308	-1.22249	0.308961	1.35135	0.224685
100302600_at	Snord43	small nucleolar RNA, C/D box 43	1.72723	0.301356	-1.57393	0.308961	1.0974	16.9924
100302601_at	Snord83b	small nucleolar RNA, C/D box 83B	-1.27023	12.3562	-1.70391	0.0296712	-2.16436	0.0469889
100302634_at	Astx6	amplified spermatogenic transcripts X encoded 6	-1.02534	60.7357	-1.12409	5.99507	-1.15257	7.52666
100302648_at	Gm11944	predicted gene 11944	-1.32371	2.9847	-1.22537	5.99507	-1.62203	0.111227
100302688_at	Gm17455	predicted gene, 17455	-1.55864	0.192905	1.60331	0.0296712	1.02866	31.9769
100302730_at	5830417I10Rik	gon-4-like pseudogene	-1.03087	60.7357	-1.01881	41.0315	-1.05026	34.5868
100303644_at	C130080G10Rik	RIKEN cDNA C130080G10 gene	1.17151	12.3562	1.17828	14.3309	1.38036	1.13219
100303645_at	D7Ertd143e	DNA segment, Chr 7, ERATO Doi 143, expressed	-2.15355	0.0881706	1.16042	5.99507	-1.85584	0.0469889
100303646_at	AF357355	snoRNA AF357355	1.2547	2.9847	1.49514	0.803127	1.87596	0.224685
100303736_at	Snora35	small nucleolar RNA, H/ACA box 35	1.07204	42.041	-1.04391	35.7106	1.02695	27.3308
100303738_at	D030025P21Rik	RIKEN cDNA D030025P21 gene	-1.10335	42.041	1.09222	14.3309	-1.01019	36.5645
100303740_at	Snora75	small nucleolar RNA, H/ACA box 75	-2.15905	0.0881706	1.395	0.803127	-1.54771	0.224685
100303746_at	Snora20	small nucleolar RNA, H/ACA box 20	1.87084	0.301356	-2.54695	0.0451547	-1.36139	16.9924
100303747_at	Gm12238	predicted gene 12238	-1.03471	60.7357	-1.14849	14.3309	-1.18835	2.97913
100303751_at	Snora31	small nucleolar RNA, H/ACA box 31	-1.22956	2.9847	1.27028	2.18295	1.03312	31.9769
100306943_at	Scarna13	small Cajal body-specific RNA 1	-1.33249	2.9847	-1.46031	0.130668	-1.94586	0
100306944_at	Snora73a	small nucleolar RNA, H/ACA box 73a	1.20839	6.16911	-1.05588	35.7106	1.14444	7.52666
100306945_at	Snora73b	small nucleolar RNA, H/ACA box 73b	1.20309	6.16911	1.04959	35.7106	1.26276	1.13219
100306952_at	Snora78	small nucleolar RNA, H/ACA box 7	1.28536	1.50007	-1.50695	0.0451547	-1.1724	7.52666
100306954_at	Snora17	small nucleolar RNA, H/ACA box 17	-1.25769	6.16911	1.21295	5.99507	-1.03689	34.5868
100306955_at	Snora43	small nucleolar RNA, H/ACA box 43	-1.33066	1.50007	1.22834	2.18295	-1.0833	27.3308
100310809_at	Gm10509	predicted gene 10509	-1.03751	60.7357	-1.89646	0.0296712	-1.9676	0.0148586
100310813_at	Snora16a	small nucleolar RNA, H/ACA box 16A	-1.17362	6.16911	1.70496	0.0451547	1.45273	0.224685
100312470_at	Vmn1r2	vomeronasal 1 receptor 2	-1.08192	57.704	2.40596	0	2.22379	0.0469889
100312471_at	Vmn1r3	vomeronasal 1 receptor 3	-1.1833	25.0856	1.63785	0.130668	1.38414	2.97913
100312473_at	Vmn1r86	vomeronasal 1 receptor 86	1.07474	42.041	-1.24797	2.18295	-1.16118	7.52666
100312474_at	Vmn1r88	vomeronasal 1 receptor, 88	1.04657	54.2028	1.10404	26.6761	1.15545	2.97913
100312476_at	Vmn1r238	vomeronasal 1 receptor, 238	1.33768	6.16911	4.45893	0	5.96463	0
100312477_at	Vmn1r184	vomeronasal 1 receptor, 184	-1.42054	2.9847	1.83775	0.0296712	1.2937	7.52666
100312484_at	Vmn1r196	vomeronasal 1 receptor 196	1.19362	12.3562	1.64186	0.308961	1.95975	0.111227
100312485_at	Vmn1r221	vomeronasal 1 receptor 221	-1.12176	54.2028	1.03409	35.7106	-1.08479	31.9769
100312948_at	Gm17689	predicted gene, 17689	-1.00541	60.7357	1.01962	35.7106	1.01413	31.9769
100312949_at	Gm17677	predicted gene, 17677	-1.08363	42.041	1.11673	14.3309	1.03054	27.3308
100312956_at	Pate3	prostate and testis expressed 3	-1.06192	57.704	1.68526	0.0451547	1.58698	0.111227
100312986_at	Gm17727	predicted gene, 17727	1.0026	54.2028	-1.05191	35.7106	-1.04919	27.3308
100312987_at	Pate1	prostate and testis expressed 1	-1.04968	60.0813	2.00738	0	1.91238	0
100313519_at	Snord17	small nucleolar RNA, C/D box 17	-1.21668	6.16911	1.27572	0.803127	1.04853	27.3308
100313531_at	Nkx2-2os	NK2 homeobox 2, opposite strand	1.03868	42.041	1.09883	14.3309	1.14133	2.97913
100316663_at	Mir669k	microRNA 669k	-1.46239	12.3562	1.56166	5.99507	1.06789	31.9769
100316664_at	Mir669d	microRNA 669d	-1.29712	6.16911	1.37261	2.18295	1.0582	31.9769
100316665_at	Mir466i	microRNA 466i	-1.04381	60.0813	-1.25575	0.803127	-1.31076	0.0469889
100316667_at	Mir669f	microRNA 669f	-1.27351	2.9847	2.07499	0	1.62934	0.0469889
100316668_at	Mir669i	microRNA 669i	1.02835	54.2028	-1.15652	2.18295	-1.12463	1.13219
100316669_at	Mir1188	microRNA 1188	1.10123	25.0856	1.11539	14.3309	1.2283	1.13219
100316671_at	Mir466j	microRNA 466j	-1.08669	54.2028	2.32898	0	2.14318	0
100316672_at	Mir1192	microRNA 1192	-1.17255	25.0856	-1.22583	5.99507	-1.43735	0.0469889
100316673_at	Mir1193	microRNA 1193	1.02272	54.2028	-1.04936	35.7106	-1.02604	31.9769
100316675_at	Mir467h	microRNA 467h	1.29529	6.16911	1.65271	2.18295	2.14073	1.13219
100316676_at	Mir1195	microRNA 1195	-1.20849	42.041	2.1757	0.0451547	1.80035	0.0148586
100316681_at	Mir1900	microRNA 1900	1.33389	12.3562	1.18387	26.6761	1.57916	2.97913
100316683_at	Mir1904	microRNA 1904	1.0822	42.041	-1.24526	0.803127	-1.15068	2.97913
100316684_at	Mir1898	microRNA 1898	1.03261	54.2028	-1.38777	0.308961	-1.34394	0.111227
100316686_at	Mir1901	microRNA 1901	-1.00319	60.7357	-1.40368	0.803127	-1.40816	1.13219
100316687_at	Mir1928	microRNA 1928	1.13547	25.0856	-1.09164	26.6761	1.04014	27.3308
100316688_at	Mir1929	microRNA 1929	-1.15069	25.0856	1.37487	0.803127	1.19483	2.97913
100316689_at	Mir1931	microRNA 1931	-1.92836	0.0546658	1.48659	0.0451547	-1.29717	0.482549
100316690_at	Mir1932	microRNA 1932	1.3079	6.16911	-1.44855	0.803127	-1.10754	27.3308
100316693_at	Mir1938	microRNA 1938	1.06747	42.041	-1.16908	5.99507	-1.09519	27.3308
100316694_at	Mir1941	microRNA 1941	-1.07917	54.2028	1.51149	0.803127	1.4006	1.13219
100316695_at	Mir1943	microRNA 1943	-1.1044	54.2028	1.65381	0.130668	1.49748	1.13219
100316697_at	Mir1946a	microRNA 1946a	-1.00285	60.7357	1.18604	14.3309	1.18267	7.52666
100316698_at	Mir1947	microRNA 1947	-1.17525	42.041	1.08526	14.3309	-1.08292	34.5868
100316699_at	Mir1948	microRNA 1948	1.07677	42.041	-1.00054	43.2839	1.07619	16.9924
100316700_at	Mir1949	microRNA 1949	2.31543	0	-1.32335	0.803127	1.74967	0
100316701_at	Mir669m-1	microRNA 669m-1	-1.44067	2.9847	2.60439	0.0451547	1.80776	0.482549
100316702_at	Mir669o	microRNA 669o	-1.74288	0.192905	2.9628	0	1.69995	0.482549
100316703_at	Mir1951	microRNA 1951	1.15471	12.3562	-1.02206	42.8252	1.12979	16.9924
100316704_at	Mir1953	microRNA 1953	-1.56761	0.748121	2.13275	0.0451547	1.36051	2.97913
100316705_at	Mir669n	microRNA 669n	-2.16051	0	2.04632	0.0296712	-1.0558	34.5868
100316706_at	Mir1956	microRNA 1956	-1.21179	12.3562	2.01449	0	1.6624	0
100316707_at	Mir1957a	microRNA 1957a	1.45143	1.50007	2.58634	0	3.7539	0
100316708_at	Mir1958	microRNA 1958	-1.00914	60.7357	-1.11946	5.99507	-1.12969	7.52666
100316709_at	Mir1960	microRNA 1960	1.08427	42.041	-1.6817	0.130668	-1.551	0.224685
100316710_at	Mir1963	microRNA 1963	1.00955	54.2028	-1.02159	41.0315	-1.01193	36.5645
100316711_at	Mir1964	microRNA 1964	-1.12375	25.0856	-1.07481	14.3309	-1.20781	0.482549
100316712_at	Mir1966	microRNA 1966	-1.41308	6.16911	-1.03924	41.0315	-1.46853	1.13219
100316713_at	Mir1968	microRNA 1968	1.18299	6.16911	-1.43919	0.0451547	-1.21657	1.13219
100316714_at	Mir1946b	microRNA 1946b	-1.00034	60.7357	-1.31883	5.99507	-1.31929	1.13219
100316715_at	Mir1971	microRNA 1971	-1.02634	60.7357	1.2356	2.18295	1.20389	2.97913
100316716_at	Mir1983	microRNA 1983	2.82454	0	-1.88716	0	1.49672	0.224685
100316717_at	Mir1839	microRNA 1839	-1.10501	57.704	-1.24443	14.3309	-1.37511	7.52666
100316725_at	Mir2136	microRNA 2136	1.02753	54.2028	1.1339	26.6761	1.16512	16.9924
100316736_at	Mir599	microRNA 599	-1.01594	60.7357	-1.27097	0.803127	-1.29123	0.482549
100316739_at	Mir1224	microRNA 1224	-1.23071	12.3562	1.09104	26.6761	-1.12802	27.3308
100316749_at	Mir467f	microRNA 467f	1.05171	42.041	-1.02834	41.0315	1.02272	31.9769
100316751_at	Mir1197	microRNA 1197	1.04635	42.041	-1.17173	5.99507	-1.11983	7.52666
100316752_at	Mir1896	microRNA 1896	-1.31952	25.0856	-2.54495	0	-3.3581	0.0469889
100316753_at	Mir1933	microRNA 1933	-1.36724	1.50007	2.5368	0	1.85542	0.0469889
100316756_at	Mir1955	microRNA 1955	-1.41269	0.748121	1.58286	0.130668	1.12046	16.9924
100316769_at	Mir466l	microRNA 466l	-1.05209	57.704	1.32312	2.18295	1.25761	2.97913
100316770_at	Mir669j	microRNA 669j	-1.60699	6.16911	2.68143	0.130668	1.6686	0.482549
100316772_at	Mir1899	microRNA 1899	1.0724	42.041	-1.10019	26.6761	-1.02591	36.071
100316774_at	Mir1942	microRNA 1942	-1.01007	60.7357	-1.11123	14.3309	-1.12242	7.52666
100316775_at	Mir1950	microRNA 1950	1.18882	25.0856	-1.32338	5.99507	-1.11319	7.52666
100316776_at	Mir1954	microRNA 1954	-1.01669	60.7357	-1.25031	0.803127	-1.27118	0
100316777_at	Mir1969	microRNA 1969	1.17378	12.3562	1.13177	14.3309	1.32845	1.13219
100316779_at	Mir2137	microRNA 2137	-1.01076	60.7357	1.59828	0.0296712	1.58126	0.0469889
100316783_at	Mir1b	microRNA 1b	1.02468	54.2028	1.09719	26.6761	1.12427	7.52666
100316784_at	Mir1927	microRNA 1927	-1.54216	1.50007	1.27735	5.99507	-1.20731	7.52666
100316802_at	Mir669g	microRNA 669g	-1.20594	25.0856	1.77288	0.0201689	1.47012	0.482549
100316803_at	Mir1187	microRNA 1187	1.22824	6.16911	-1.27903	0.803127	-1.04135	31.9769
100316804_at	Mir466f-4	microRNA 466f-4	-1.25113	6.16911	1.8773	0	1.50049	0.111227
100316805_at	Mir1190	microRNA 1190	-1.70632	0	2.16995	0	1.27171	0.0469889
100316806_at	Mir669e	microRNA 669e	1.01628	54.2028	-1.05139	35.7106	-1.03455	34.5868
100316807_at	Mir1198	microRNA 1198	-1.21117	25.0856	1.83056	0.0451547	1.5114	0.0469889
100316808_at	Mir1905	microRNA 1905	1.11379	25.0856	1.55307	5.99507	1.7298	2.97913
100316811_at	Mir1930	microRNA 1930	1.06995	42.041	1.15619	5.99507	1.23707	1.13219
100316812_at	Mir1936	microRNA 1936	-1.10834	54.2028	-1.22898	2.18295	-1.36213	0.482549
100316815_at	Mir669l	microRNA 669l	-1.04784	57.704	1.49163	0.803127	1.42353	1.13219
100316816_at	Mir1952	microRNA 1952	1.01114	54.2028	-1.11412	26.6761	-1.10184	16.9924
100316818_at	Mir1962	microRNA 1962	-1.18935	42.041	1.43788	2.18295	1.20896	7.52666
100316819_at	Mir1967	microRNA 1967	-1.00222	60.7357	-1.00361	43.2839	-1.00583	36.5645
100316820_at	Mir1970	microRNA 1970	-1.26216	25.0856	3.49527	0	2.76928	0
100316821_at	Mir1981	microRNA 1981	-1.04587	60.0813	1.09866	14.3309	1.05047	16.9924
100316827_at	Mir767	microRNA 767	1.00915	54.2028	-1.03614	35.7106	-1.02675	36.071
100316831_at	Mir669h	microRNA 669h	-1.29331	2.9847	1.99319	0.0451547	1.54115	0.482549
100316832_at	Mir1895	microRNA 1895	-1.07428	54.2028	-1.22255	5.99507	-1.31336	2.97913
100316833_at	Mir1945	microRNA 1945	1.4638	1.50007	-1.07174	35.7106	1.36581	0.224685
100316834_at	Mir669m-2	microRNA 669m-2	1.08911	42.041	-1.25377	5.99507	-1.15119	7.52666
100316840_at	Mir1934	microRNA 1934	-1.00144	60.7357	1.0024	42.8252	1.00096	31.9769
100316841_at	Mir1961	microRNA 1961	1.03443	42.041	-1.21772	0.308961	-1.17719	0.224685
100316870_at	Gm17821	DDB1 and CUL4 associated factor 5 pseudogene	1.24865	12.3562	1.22315	5.99507	1.52729	0.224685
100316932_at	Snora28	small nucleolar RNA, H/ACA box 28	-2.04457	0.0881706	-1.21716	5.99507	-2.48858	0
100317_at	AU040320	expressed sequence AU040320	-1.0824	42.041	-1.02859	41.0315	-1.11334	7.52666
100322896_at	Dthd1	death domain containing 1	1.06617	42.041	1.07124	26.6761	1.14212	7.52666
100328588_at	Gm21948	predicted gene, 21948	-1.02167	60.7357	1.12629	26.6761	1.10239	27.3308
100336_at	Ppp1r8	protein phosphatase 1, regulatory (inhibitor) subunit 8	1.20992	6.16911	-1.31372	0.803127	-1.08579	27.3308
100340_at	Smpdl3b	sphingomyelin phosphodiesterase, acid-like 3B	8.635	0	-8.3199	0	1.03787	31.9769
100342_at	Fam46b	family with sequence similarity 46, member B	1.0066	54.2028	1	42.8252	1.0066	31.9769
100379095_at	A830092H15Rik	RIKEN cDNA A830092H15 gene	-1.05752	60.7357	-1.22825	14.3309	-1.2989	16.9924
100379145_at	Snora23	small nucleolar RNA, H/ACA box 23	-1.07253	54.2028	-1.62482	0.0296712	-1.74267	0
100379610_at	Gm11651	predicted gene 11651	1.18322	12.3562	-1.02658	41.0315	1.15259	2.97913
100380944_at	Ino80dos	INO80 complex subunit D, opposite strand	-1.71467	0.192905	1.10472	26.6761	-1.55212	0.111227
100382_at	AW011738	expressed sequence AW011738	1.17661	12.3562	-1.34717	0.803127	-1.14496	16.9924
100383_at	Bsdc1	BSD domain containing 1	-1.26929	2.9847	1.22724	2.18295	-1.03426	34.5868
100384890_at	D230030E09Rik	Riken cDNA D230030E09 gene	1.0942	25.0856	-1.07652	26.6761	1.01642	31.9769
100415784_at	Gm17830	predicted gene, 17830	1.09083	42.041	-1.12468	26.6761	-1.03103	36.071
100415785_at	Gm11559	predicted gene 11559	1.02876	54.2028	1.2203	2.18295	1.2554	2.97913
100415787_at	Tomm6os	translocase of outer mitochondrial membrane 6, opposite strand	-1.29364	6.16911	1.27833	2.18295	-1.01197	36.5645
100415901_at	Gm13648	predicted gene 13648	1.0791	42.041	-1.15155	14.3309	-1.06714	31.9769
100415902_at	Gm15658	predicted gene 15658	-1.3138	2.9847	1.33136	2.18295	1.01336	31.9769
100415912_at	Gm11665	predicted gene 11665	1.0832	25.0856	1.19904	2.18295	1.2988	0.482549
100415914_at	Gm12505	predicted gene 12505	-1.09979	54.2028	1.31125	2.18295	1.19227	7.52666
100415915_at	A530072M11Rik	RIKEN cDNA gene A530072M11	-1.02573	60.7357	-1.02067	41.0315	-1.04693	31.9769
100415916_at	Gm15997	predicted gene 15997	1.05524	42.041	1.32268	0.803127	1.39575	0.224685
100416706_at	Zfp729b	zinc finger protein 729b	-1.06155	57.704	-1.13528	5.99507	-1.20516	7.52666
100416808_at	Zfp422-ps	zinc finger protein 422, pseudogene	-1.11122	42.041	1.24127	2.18295	1.11703	7.52666
100416830_at	Zfp572	zinc finger protein 572	1.01537	54.2028	1.03107	35.7106	1.04691	16.9924
100417125_at	Gm18409	mediator of cell motility 1 pseudogene	1.04492	42.041	1.2092	5.99507	1.26352	1.13219
100417137_at	Gm18418	predicted gene, 18418	1.11315	25.0856	1.3461	0.308961	1.49841	0.0469889
100417514_at	Adh6b	alcohol dehydrogenase 6B (class V)	-1.09065	54.2028	1.35366	2.18295	1.24115	2.97913
100417675_at	Nlrp5-ps	NLR family, pyrin domain containing 5, pseudogene	1.02673	54.2028	1.0785	26.6761	1.10733	7.52666
100418235_at	C130030K03Rik	proteasome (prosome, macropain) subunit, alpha type 6 pseudogene	1.3335	6.16911	1.10534	35.7106	1.47397	1.13219
100434_at	Slc44a1	solute carrier family 44, member 1	-1.17207	12.3562	1.16229	5.99507	-1.00842	36.5645
100462741_at	Gm17241	ribosomal protein S27 pseudogene	1.37847	2.9847	-2.4041	0	-1.74403	0.111227
100463512_at	Gm20594	predicted gene, 20594	1.00514	54.2028	-1.26855	2.18295	-1.26206	1.13219
100463519_at	BB283400	expressed sequence BB283400	1.10927	25.0856	1.01998	41.0315	1.13143	2.97913
100465_at	Mob3c	MOB kinase activator 3C	-1.09219	42.041	-1.07041	26.6761	-1.16909	2.97913
100470_at	Lao1	L-amino acid oxidase 1	1.03185	54.2028	1.07816	26.6761	1.11249	7.52666
100473_at	BB031773	expressed sequence BB031773	1.15253	12.3562	-1.12216	5.99507	1.02707	27.3308
100494_at	Zfand2a	zinc finger, AN1-type domain 2A	-1.03298	60.0813	-1.56808	0.0451547	-1.61979	0.0469889
100499512_at	Mir3475	microRNA 3475	-1.32252	6.16911	6.05205	0	4.57616	0
100499513_at	Mir3099	microRNA 3099	1.04316	42.041	-1.08215	26.6761	-1.03737	31.9769
100499521_at	Mir3471-1	microRNA 3471-1	-1.05874	57.704	1.31577	5.99507	1.24277	7.52666
100499528_at	Mir3473a	microRNA 3473a	-1.05111	57.704	-1.16026	5.99507	-1.21957	1.13219
100499529_at	Mir3474	microRNA 3474	-1.13918	42.041	-1.17856	5.99507	-1.34259	0.482549
100500713_at	9530027J09Rik	RIKEN cDNA 9530027J09 gene	1.16392	6.16911	-1.21802	0.803127	-1.04649	27.3308
100502590_at	Tex50	testis expressed 50	1.26613	6.16911	2.1592	0	2.73382	0
100502597_at	Gm19272	predicted gene, 19272	1.03899	42.041	1.03238	35.7106	1.07264	16.9924
100502601_at	Gm19276	predicted gene, 19276	1.02956	54.2028	-1.00171	43.2839	1.0278	27.3308
100502602_at	Gm19277	predicted gene, 19277	1.04659	42.041	1.0275	35.7106	1.07538	7.52666
100502619_at	AW046200	expressed sequence AW046200	-1.06195	57.704	1.10435	26.6761	1.03992	27.3308
100502624_at	Gm13483	predicted gene 13483	-1.18563	12.3562	1.2732	2.18295	1.07386	16.9924
100502630_at	Gm15545	predicted gene 15545	-1.00007	60.7357	1.31498	2.18295	1.31489	1.13219
100502635_at	Gm11525	predicted gene 11525	-1.15865	42.041	1.34513	0.803127	1.16094	7.52666
100502636_at	Gm19299	predicted gene, 19299	1.09922	25.0856	1.10131	14.3309	1.21058	1.13219
100502641_at	Gm17511	ribosomal protein, large, P1 pseudogene	1.06562	42.041	-1.08372	35.7106	-1.01699	36.5645
100502643_at	Gm19303	predicted gene, 19303	1.23893	6.16911	-1.15607	5.99507	1.07168	16.9924
100502653_at	C130060C02Rik	RIKEN cDNA C130060C02 gene	-1.58628	0.192905	1.98658	0	1.25235	0.482549
100502670_at	Gm16010	predicted gene 16010	-1.00779	60.7357	1.21325	5.99507	1.20387	2.97913
100502694_at	Gm19325	predicted gene, 19325	1.22122	12.3562	1.84246	0.0451547	2.25005	0
100502695_at	Gm17399	predicted gene, 17399	-1.00442	60.7357	1.0106	41.0315	1.00615	31.9769
100502697_at	Gm19327	predicted gene, 19327	-1.12024	42.041	1.29615	2.18295	1.15703	1.13219
100502698_at	Rubcn	RUN domain and cysteine-rich domain containing, Beclin 1-interacting protein	1.00909	54.2028	-1.06602	26.6761	-1.05642	27.3308
100502700_at	AV039307	expressed sequence AV039307	-1.22741	12.3562	1.30639	0.308961	1.06435	27.3308
100502723_at	Tsga8	testis specific gene A8	1.04514	42.041	-1.01371	41.0315	1.03101	27.3308
100502727_at	Gm19340	NADH dehydrogenase [ubiquinone] 1 alpha subcomplex subunit 5-like	-1.11371	25.0856	1.07854	26.6761	-1.03261	36.5645
100502734_at	Gm16023	predicted gene 16023	-1.3095	0.748121	1.13694	5.99507	-1.15177	1.13219
100502736_at	Gm19345	predicted gene, 19345	-1.04017	57.704	1.47506	0.803127	1.41809	1.13219
100502742_at	1700007L15Rik	RIKEN cDNA 1700007L15 gene	1.22201	6.16911	-1.36368	0.803127	-1.11593	16.9924
100502745_at	2900009J06Rik	RIKEN cDNA 2900009J06 gene	1.03838	54.2028	1.13783	5.99507	1.1815	2.97913
100502764_at	Gm16617	predicted gene, 16617	-1.02953	60.7357	1.09248	26.6761	1.06114	16.9924
100502766_at	Kifc1	kinesin family member C1	-1.23056	12.3562	1.18311	14.3309	-1.0401	31.9769
100502777_at	Gm38422	predicted gene, 38422	1.20784	25.0856	-1.02316	42.8252	1.1805	7.52666
100502803_at	Gm11562	predicted gene 11562	-1.02839	60.7357	-1.02506	35.7106	-1.05415	27.3308
100502819_at	BC065403	cDNA sequence BC065403	1.23514	6.16911	1.10427	26.6761	1.36393	1.13219
100502820_at	Gm19395	predicted gene, 19395	1.05837	42.041	1.0037	42.8252	1.06228	16.9924
100502829_at	Gm9899	predicted gene 9899	1.00186	54.2028	1.22564	0.803127	1.22792	0.482549
100502831_at	Gm19402	predicted gene, 19402	1.12249	25.0856	1.31777	0.803127	1.47919	0.224685
100502834_at	Gm15972	predicted gene 15972	1.04197	54.2028	1.33421	2.18295	1.39021	1.13219
100502841_at	Epg5	ectopic P-granules autophagy protein 5 homolog (C. elegans)	-1.06717	54.2028	1.01622	41.0315	-1.05014	31.9769
100502842_at	Gm14718	predicted gene 14718	-1.06536	57.704	1.41042	2.18295	1.32389	2.97913
100502846_at	Gm19410	predicted gene, 19410	-1.02324	60.7357	1.2346	5.99507	1.20656	2.97913
100502849_at	Gm19412	predicted gene, 19412	-1.04889	57.704	-1.14095	5.99507	-1.19674	1.13219
100502861_at	Ccdc13	coiled-coil domain containing 13	-1.04907	57.704	-1.05542	35.7106	-1.10721	16.9924
100502865_at	2300003K06Rik	RIKEN cDNA 2300003K06 gene	1.22573	12.3562	-1.00922	43.2839	1.21453	2.97913
100502868_at	Gm20597	predicted gene, 20597	-1.03045	60.7357	1.64933	0.308961	1.60059	0.482549
100502871_at	Gm19424	predicted gene, 19424	1.07693	42.041	-1.01841	41.0315	1.05746	16.9924
100502874_at	Gm19426	predicted gene, 19426	1.01303	54.2028	1.03866	26.6761	1.05219	16.9924
100502876_at	Kcnmb3	potassium large conductance calcium-activated channel, subfamily M, beta member 3	-1.11029	54.2028	1.1383	14.3309	1.02523	31.9769
100502887_at	Olfr331	olfactory receptor 331	1.11193	25.0856	1.32267	5.99507	1.47071	2.97913
100502888_at	Gm19434	predicted gene, 19434	-1.02929	60.7357	1.03538	35.7106	1.00591	31.9769
100502896_at	Gm11238	predicted gene 11238	-1.56486	12.3562	4.74585	0.0451547	3.03276	0.0148586
100502917_at	Gm12130	predicted gene 12130	-1.0115	60.7357	1.18843	5.99507	1.17491	7.52666
100502920_at	Gm16998	predicted gene, 16998	1.12174	25.0856	-1.17525	2.18295	-1.0477	31.9769
100502921_at	Gm10142	predicted gene 10142	-1.00137	60.7357	1.64202	0.0296712	1.63977	0.0148586
100502923_at	Gm17619	predicted gene, 17619	-2.45535	0	2.09145	0.0296712	-1.17399	2.97913
100502932_at	Gm13544	predicted gene 13544	1.00126	54.2028	1.28219	0.803127	1.28381	0.482549
100502933_at	Gm19461	predicted gene, 19461	1.02899	54.2028	-1.02163	41.0315	1.0072	31.9769
100502936_at	E330021D16Rik	RIKEN cDNA E330021D16 gene	-1.13436	25.0856	1.51616	0.130668	1.33658	0.482549
100502937_at	Gm19463	predicted gene, 19463	-1.88425	0.0881706	1.33653	0.803127	-1.40981	0.0469889
100502940_at	Colca2	COLCA2 homolog	1.1083	25.0856	-1.02541	41.0315	1.08084	16.9924
100502942_at	Gm4814	predicted gene 4814	1.10404	25.0856	-1.07622	26.6761	1.02585	31.9769
100502945_at	Gm19466	predicted gene, 19466	1.12519	25.0856	1.11845	14.3309	1.25847	0.482549
100502946_at	Gm16796	predicted gene, 16796	1.04008	54.2028	1.08598	14.3309	1.12951	16.9924
100502950_at	Gm3336	predicted gene 3336	-1.3342	1.50007	1.48868	0.803127	1.11579	16.9924
100502953_at	Gm10100	predicted gene 10100	1.16277	25.0856	1.03948	35.7106	1.20868	1.13219
100502959_at	AV051173	expressed sequence AV051173	1.54494	0.748121	-1.55922	0.308961	-1.00924	36.5645
100502967_at	Speer4c	spermatogenesis associated glutamate (E)-rich protein 4C	1.28457	12.3562	9.31995	0	11.9721	0
100502973_at	Gm12996	predicted gene 12996	-1.1762	12.3562	1.05305	26.6761	-1.11695	16.9924
100502978_at	Gm19484	predicted gene, 19484	-1.4216	6.16911	1.95969	0.0451547	1.37851	2.97913
100502982_at	BC037704	cDNA sequence BC037704	-1.16356	25.0856	1.24801	2.18295	1.07257	16.9924
100502985_at	Gm10814	predicted gene 10814	-1.08692	42.041	1.02644	35.7106	-1.05892	16.9924
100502987_at	Gm17066	predicted gene 17066	1.08224	42.041	-1.98502	0.0201689	-1.83417	0.0148586
100503002_at	Gm38424	predicted gene, 38424	-1.27639	2.9847	1.06248	26.6761	-1.20133	2.97913
100503007_at	Gm19500	predicted gene, 19500	-1.04142	60.0813	1.61342	0.130668	1.54926	0.224685
100503008_at	Gm19501	predicted gene, 19501	-1.34898	0.748121	1.39021	0.308961	1.03056	27.3308
100503014_at	Gm19505	PCNA-associated factor-like	1.19269	12.3562	-1.62218	0.0451547	-1.36011	1.13219
100503019_at	Gm16551	predicted gene 16551	1.18737	12.3562	-1.21552	5.99507	-1.02371	36.5645
100503021_at	Gm19510	predicted gene, 19510	-1.17712	25.0856	1.51757	0.803127	1.28922	0.111227
100503033_at	Gm19519	predicted gene, 19519	1.08526	25.0856	1.06063	26.6761	1.15107	2.97913
100503036_at	1700015G11Rik	RIKEN cDNA 1700015G11 gene	1.16524	12.3562	-1.21189	5.99507	-1.04004	34.5868
100503040_at	Gm19522	predicted gene, 19522	-1.03615	60.7357	1.13299	26.6761	1.09347	7.52666
100503041_at	Pdzd7	PDZ domain containing 7	-1.03253	60.7357	1.10238	26.6761	1.06765	16.9924
100503043_at	Armcx4	armadillo repeat containing, X-linked 4	1.1063	25.0856	-1.11764	14.3309	-1.01026	36.5645
100503044_at	A730020M07Rik	RIKEN cDNA A730020M07 gene	1.18172	12.3562	1.01217	41.0315	1.1961	1.13219
100503048_at	LOC100503048	olfactory receptor 7G2-like	1.0812	42.041	1.15415	5.99507	1.24786	2.97913
100503053_at	Gm14517	predicted gene 14517	1.1589	12.3562	-1.09066	26.6761	1.06257	7.52666
100503068_at	Gm11549	predicted gene 11549	1.01794	54.2028	-1.0281	41.0315	-1.00998	36.5645
100503072_at	Gm16291	predicted gene 16291	1.01705	54.2028	1.13386	14.3309	1.15319	7.52666
100503074_at	2610016A17Rik	RIKEN cDNA 2610016A17 gene	-1.00093	60.7357	1.05018	26.6761	1.04921	27.3308
100503082_at	2010110K18Rik	RIKEN cDNA 2010110K18 gene	-1.18323	25.0856	1.1384	26.6761	-1.03938	36.071
100503085_at	Klhl3	kelch-like 3	-1.05019	57.704	1.00903	41.0315	-1.04079	31.9769
100503099_at	Gm19554	predicted gene, 19554	1.00313	54.2028	-1.00296	43.2839	1.00017	31.9769
100503104_at	Gm19557	predicted gene, 19557	1.09135	25.0856	-1.12577	14.3309	-1.03154	34.5868
100503106_at	Gm13944	predicted gene 13944	1.31244	2.9847	-1.17151	5.99507	1.1203	16.9924
100503117_at	2010010A06Rik	RIKEN cDNA 2010010A06 gene	1.11114	25.0856	-1.05892	26.6761	1.04932	16.9924
100503120_at	A930006K02Rik	RIKEN cDNA A930006K02 gene	-1.05815	57.704	-1.14976	5.99507	-1.21662	0.482549
100503127_at	Gm19566	60S ribosomal protein L15-like	1.15575	25.0856	-1.08523	26.6761	1.06498	16.9924
100503147_at	Gm13293	predicted gene 13293	1.10963	25.0856	1.12045	14.3309	1.24329	2.97913
100503157_at	Gm15471	predicted gene 15471	-1.12372	42.041	1.03535	35.7106	-1.08536	31.9769
100503166_at	1700048M11Rik	RIKEN cDNA 1700048M11 gene	-1.16229	12.3562	1.50239	0.308961	1.29261	1.13219
100503167_at	Gm13752	predicted gene 13752	-1.00472	60.7357	1.21817	2.18295	1.21245	0.482549
100503175_at	Gm19582	predicted gene, 19582	-1.15374	42.041	-1.28652	2.18295	-1.48431	0.224685
100503178_at	2810013P06Rik	RIKEN cDNA 2810013P06 gene	-1.80624	0.0881706	1.30632	0.803127	-1.38269	0.0148586
100503184_at	Gm19583	predicted gene, 19583	-1.01525	60.7357	-1.03076	35.7106	-1.04648	27.3308
100503185_at	Btbd8	BTB (POZ) domain containing 8	-1.29938	2.9847	-1.12199	14.3309	-1.4579	0.224685
100503190_at	Gm19585	predicted gene, 19585	2.22338	0	-3.18845	0	-1.43406	0.224685
100503197_at	Gm19589	predicted gene, 19589	-1.10009	42.041	1.6402	0.0451547	1.49097	0.224685
100503199_at	5430416N02Rik	RIKEN cDNA 5430416N02 gene	1.22757	6.16911	-1.31002	0.803127	-1.06716	16.9924
100503230_at	Gm19600	predicted gene, 19600	1.07827	42.041	1.07795	35.7106	1.16232	16.9924
100503240_at	Trpc5os	transient receptor potential cation channel, subfamily C, member 5, opposite strand	-1.13846	25.0856	1.40282	0.308961	1.2322	2.97913
100503242_at	Scgb2b6	secretoglobin, family 2B, member 6	-1.03162	60.7357	-1.15689	14.3309	-1.19347	1.13219
100503248_at	Gm15179	predicted gene 15179	-1.01364	60.7357	1.26385	0.803127	1.24684	1.13219
100503265_at	Gm19619	predicted gene, 19619	-1.07317	54.2028	1.30143	0.803127	1.21269	2.97913
100503266_at	Gm19620	predicted gene, 19620	-1.11276	25.0856	-1.21873	0.803127	-1.35615	0
100503272_at	Gm11423	predicted gene 11423	-1.06016	57.704	-1.05484	35.7106	-1.11829	16.9924
100503280_at	Gm38425	predicted gene, 38425	-1.00175	60.7357	-1.37331	0.803127	-1.37571	0.224685
100503289_at	Gm14133	predicted gene 14133	-1.02562	60.7357	1.03777	26.6761	1.01185	31.9769
100503292_at	Gm12279	predicted gene 12279	-1.20742	6.16911	1.32681	0.308961	1.09888	2.97913
100503307_at	Gm15408	predicted gene 15408	1.14219	12.3562	-1.20638	2.18295	-1.05619	34.5868
100503311_at	Pifo	primary cilia formation	1.11017	12.3562	1.02363	35.7106	1.1364	1.13219
100503323_at	A230087F16Rik	RIKEN cDNA A230087F16 gene	-1.13552	54.2028	1.27257	5.99507	1.12069	16.9924
100503331_at	Gm6724	high mobility group nucleosomal binding domain 2 pseudogene	1.39285	12.3562	-1.67749	2.18295	-1.20436	27.3308
100503332_at	Gm19639	predicted gene, 19639	1.00929	54.2028	-1.21483	0.803127	-1.20365	1.13219
100503337_at	Gm9895	predicted gene 9895	1.04063	54.2028	1.08166	26.6761	1.12561	16.9924
100503338_at	LOC100503338	uncharacterized LOC100503338	2.47119	0	-1.06145	26.6761	2.32813	0
100503355_at	Zfp648	zinc finger protein 648	1.11382	25.0856	1.20517	5.99507	1.34234	1.13219
100503361_at	Tmem95	transmembrane protein 95	-1.22993	6.16911	1.18431	2.18295	-1.03852	34.5868
100503376_at	Gm19663	predicted gene, 19663	-1.04905	60.7357	1.06198	35.7106	1.01233	31.9769
100503378_at	Gm15638	predicted gene 15638	1.05043	42.041	1.04873	26.6761	1.10162	16.9924
100503380_at	Snhg4	small nucleolar RNA host gene 4	1.77473	0	-1.40475	0.0296712	1.26338	0.111227
100503384_at	Gm19665	predicted gene, 19665	-1.56508	0.301356	-1.84243	0	-2.88354	0
100503386_at	Tpbgl	trophoblast glycoprotein-like	1.05622	42.041	1.07964	14.3309	1.14034	2.97913
100503388_at	Gm19668	predicted gene, 19668	-1.18916	12.3562	1.73131	0.130668	1.45591	0.482549
100503390_at	Gm17518	predicted gene, 17518	-1.0875	54.2028	1.03459	35.7106	-1.05115	31.9769
100503392_at	4833438C02Rik	RIKEN cDNA 4833438C02 gene	-1.04892	57.704	-1.95653	0	-2.05226	0
100503393_at	Gm14827	predicted gene 14827	-1.08334	42.041	2.05231	0.0201689	1.89443	0
100503399_at	Gm19673	predicted gene, 19673	-1.15568	25.0856	1.49838	0.803127	1.29654	1.13219
100503427_at	Gm10390	predicted gene 10390	-1.12094	42.041	1.05447	35.7106	-1.06304	34.5868
100503432_at	Gm19688	60S ribosomal protein L23-like	1.00505	54.2028	1.02584	35.7106	1.03102	31.9769
100503434_at	Gm19689	predicted gene, 19689	1.21641	6.16911	-1.07351	26.6761	1.13312	2.97913
100503447_at	Gm19696	predicted gene, 19696	-1.06231	54.2028	1.15137	5.99507	1.08383	7.52666
100503459_at	Gm14539	upregulated during skeletal muscle growth 5 pseudogene	1.41587	6.16911	-1.50111	2.18295	-1.0602	27.3308
100503460_at	Gm19705	predicted gene, 19705	-3.50393	0	2.70569	0	-1.29503	0.224685
100503468_at	Gm14023	predicted gene 14023	1.70359	0.104308	-1.67709	0.0451547	1.0158	31.9769
100503469_at	Gm19710	predicted gene, 19710	1.09193	25.0856	-1.28645	0.308961	-1.17815	2.97913
100503470_at	Gm16619	predicted gene, 16619	1.04848	42.041	-1.02943	41.0315	1.01851	31.9769
100503471_at	Gm15867	predicted gene 15867	1.01513	54.2028	1.00462	42.8252	1.01983	27.3308
100503474_at	Platr22	pluripotency associated transcript 22	1.15066	25.0856	1.38239	0.308961	1.59066	0.224685
100503481_at	4930453H23Rik	RIKEN cDNA 4930453H23 gene	1.12839	12.3562	1.00011	42.8252	1.12852	7.52666
100503486_at	Olfr936	olfactory receptor 936	1.10316	25.0856	-1.0602	26.6761	1.04052	16.9924
100503490_at	Gm19723	predicted gene, 19723	-1.10953	42.041	1.13352	5.99507	1.02163	31.9769
100503495_at	A930016O22Rik	RIKEN cDNA A930016O22 gene	1.14842	25.0856	-1.45127	0.130668	-1.26371	2.97913
100503496_at	Gm45916	predicted gene, 45916	1.13372	25.0856	-1.04108	35.7106	1.08898	16.9924
100503498_at	Gm16675	predicted gene, 16675	-1.30745	2.9847	1.11668	14.3309	-1.17083	2.97913
100503518_at	Gm11827	predicted gene 11827	-3.916	0	3.92204	0	1.00154	31.9769
100503519_at	Gm19744	predicted gene, 19744	1.19558	25.0856	-1.18026	14.3309	1.01299	31.9769
100503530_at	Gm11351	predicted gene 11351	1.0851	42.041	-1.11894	14.3309	-1.03119	34.5868
100503536_at	Gm19757	predicted gene, 19757	-1.00632	60.7357	1.00985	41.0315	1.00351	31.9769
100503538_at	Gm15941	predicted gene 15941	1.08227	42.041	1.08017	14.3309	1.16904	2.97913
100503545_at	Nuggc	nuclear GTPase, germinal center associated	1.10692	25.0856	1.15005	5.99507	1.27301	0.482549
100503549_at	Gm10354	predicted gene 10354	1.14387	25.0856	2.53724	0.0296712	2.90227	0.0148586
100503565_at	Gm9926	predicted gene 9926	-1.05539	57.704	1.21868	5.99507	1.15472	7.52666
100503572_at	Bbip1	BBSome interacting protein 1	1.0594	42.041	-1.23696	2.18295	-1.1676	7.52666
100503580_at	Gm19782	predicted gene, 19782	1.06976	42.041	1.0714	26.6761	1.14614	2.97913
100503582_at	Gm19784	predicted gene, 19784	-1.07996	54.2028	1.60232	0.130668	1.48369	0.111227
100503583_at	Fsbp	fibrinogen silencer binding protein	1.00642	54.2028	1.06803	35.7106	1.07488	7.52666
100503592_at	A330076C08Rik	RIKEN cDNA A330076C08 gene	-1.04445	60.0813	1.31577	0.803127	1.25978	1.13219
100503594_at	4930534D22Rik	RIKEN cDNA 4930534D22 gene	1.02317	54.2028	1.01307	41.0315	1.03655	31.9769
100503595_at	Gm13003	predicted gene 13003	1.05895	42.041	1.29589	5.99507	1.37227	1.13219
100503605_at	Hbb-bs	hemoglobin, beta adult s chain	-1.64518	1.50007	-1.18403	26.6761	-1.94795	0.0469889
100503609_at	Lnp1	leukemia NUP98 fusion partner 1	1.11665	25.0856	-1.06059	26.6761	1.05286	16.9924
100503613_at	5031434C07Rik	RIKEN cDNA 5031434C07 gene	1.02203	54.2028	1.37749	0.803127	1.40783	0.111227
100503619_at	E330011O21Rik	RIKEN cDNA E330011O21 gene	-1.61112	0.104308	1.20527	2.18295	-1.33672	0.482549
100503620_at	Gm15337	predicted gene 15337	-1.02318	60.7357	1.27092	14.3309	1.24213	7.52666
100503622_at	Gm16630	predicted gene, 16630	-1.02524	60.7357	1.28954	0.308961	1.2578	0.482549
100503630_at	Gm12002	predicted gene 12002	1.2141	6.16911	-1.1787	5.99507	1.03004	27.3308
100503636_at	1700123M08Rik	RIKEN cDNA 1700123M08 gene	1.13287	25.0856	-1.12294	14.3309	1.00885	31.9769
100503652_at	Gm16845	predicted gene, 16845	-1.33465	0.748121	-1.38278	0.130668	-1.84553	0
100503659_at	Cbarp	calcium channel, voltage-dependent, beta subunit associated regulatory protein	1.27292	6.16911	-1.21903	5.99507	1.04421	27.3308
100503670_at	Rpl5	ribosomal protein L5	1.64798	1.50007	-1.3284	5.99507	1.24057	7.52666
100503676_at	Gm38426	predicted gene, 38426	-1.15794	25.0856	1.25746	2.18295	1.08595	16.9924
100503690_at	Gm19835	predicted gene, 19835	1.04156	42.041	1.0921	26.6761	1.13748	7.52666
100503704_at	Gm16861	predicted gene, 16861	-1.13634	25.0856	-1.00955	43.2839	-1.1472	16.9924
100503710_at	Gm5741	predicted gene 5741	-1.23763	12.3562	1.31701	5.99507	1.06414	27.3308
100503724_at	Dnajc19-ps	DnaJ heat shock protein family (Hsp40) member C19, pseudogene	1.50029	0.192905	-1.384	0.130668	1.08402	16.9924
100503727_at	1700011B04Rik	RIKEN cDNA 1700011B04 gene	1.01327	54.2028	1.35708	0.130668	1.37509	0.0469889
100503743_at	Gm19866	predicted gene, 19866	-1.00071	60.7357	1.04063	35.7106	1.03989	27.3308
100503751_at	Gm19872	predicted gene, 19872	-1.0417	60.7357	1.30164	2.18295	1.24954	1.13219
100503754_at	Gm11725	predicted gene 11725	1.23769	12.3562	1.14906	14.3309	1.42218	0.0469889
100503759_at	Gm5084	predicted gene 5084	1.0372	54.2028	1.08461	26.6761	1.12497	2.97913
100503783_at	Gm17733	predicted gene, 17733	-1.06431	57.704	-1.06989	26.6761	-1.1387	27.3308
100503790_at	Gm19897	predicted gene, 19897	-1.39837	0.301356	-1.89169	0	-2.64529	0
100503794_at	Gm9920	predicted gene 9920	-1.08532	54.2028	1.12997	14.3309	1.04114	27.3308
100503802_at	Gm10419	predicted gene 10419	-1.04493	60.0813	-1.06694	26.6761	-1.11488	16.9924
100503808_at	Gm14925	HIG1 domain family member 1A-like	1.24121	12.3562	-1.30962	5.99507	-1.05511	34.5868
100503810_at	Gm13056	predicted gene 13056	-1.01912	60.7357	1.1198	14.3309	1.09879	7.52666
100503812_at	3300002A11Rik	RIKEN cDNA 3300002A11 gene	-1.19638	25.0856	1.20062	5.99507	1.00355	31.9769
100503816_at	Gm16548	predicted gene 16548	-1.56844	0.748121	1.54582	0.308961	-1.01464	36.5645
100503823_at	Gm16973	predicted gene, 16973	-1.40151	0.301356	-1.13872	14.3309	-1.59592	0.111227
100503827_at	Tnfsf13os	tumor necrosis factor (ligand) superfamily, member 13, opposite strand	-1.55298	0.748121	1.35192	0.803127	-1.14872	16.9924
100503830_at	Gm11762	predicted gene 11762	1.08609	25.0856	1.06105	26.6761	1.1524	2.97913
100503831_at	Gm38427	predicted gene, 38427	-1.09545	42.041	1.09294	14.3309	-1.0023	36.5645
100503842_at	2410022M11Rik	RIKEN cDNA 2410022M11 gene	1.01338	54.2028	-1.27712	2.18295	-1.26026	2.97913
100503849_at	Sp3os	trans-acting transcription factor 3, opposite strand	-1.33533	0.748121	-1.52831	0.0296712	-2.04079	0
100503856_at	1700024B05Rik	RIKEN cDNA 1700024B05 gene	-1.1739	25.0856	1.06488	35.7106	-1.10237	27.3308
100503859_at	1110015O18Rik	RIKEN cDNA 1110015O18 gene	1.0927	25.0856	-1.00973	42.8252	1.08217	16.9924
100503866_at	Gm15558	predicted gene 15558	-1.08214	42.041	1.29079	0.803127	1.19281	1.13219
100503868_at	Gm19935	predicted gene, 19935	1.05704	42.041	-1.06951	26.6761	-1.0118	36.071
100503869_at	Mkln1os	muskelin 1, intracellular mediator containing kelch motifs, opposite strand	1.01084	54.2028	-1.08394	14.3309	-1.07232	27.3308
100503872_at	Hotair	HOX transcript antisense RNA (non-protein coding)	1.04874	54.2028	1.43394	0.803127	1.50383	0.224685
100503879_at	Gm5901	predicted gene 5901	-1.32709	2.9847	1.15604	14.3309	-1.14796	16.9924
100503882_at	Gm17308	predicted gene, 17308	1.01052	54.2028	1.29057	0.803127	1.30415	1.13219
100503884_at	Ccdc149	coiled-coil domain containing 149	-1.05538	57.704	1.09093	14.3309	1.03369	27.3308
100503890_at	Pet100	PET100 homolog	-1.04323	57.704	1.02665	35.7106	-1.01615	36.5645
100503895_at	Tpsab1	tryptase alpha/beta 1	1.01477	54.2028	1.0119	41.0315	1.02685	27.3308
100503908_at	Gm19956	predicted gene, 19956	-1.04932	60.0813	1.24717	5.99507	1.18855	1.13219
100503915_at	Smpd5	sphingomyelin phosphodiesterase 5	-1.13071	42.041	4.53374	0	4.00964	0
100503918_at	Gm19963	UPF0124 protein C13orf31 homolog	1.03237	54.2028	-1.26299	0.803127	-1.22339	1.13219
100503924_at	Fcor	Foxo1 corepressor	-1.00329	60.7357	1.27102	0.308961	1.26685	0.224685
100503961_at	Gm19990	predicted gene, 19990	1.00292	54.2028	-1.03289	35.7106	-1.02989	31.9769
100503962_at	Gm16701	predicted gene, 16701	1.11399	25.0856	1.168	5.99507	1.30114	1.13219
100503964_at	Gm17266	predicted gene, 17266	-1.02042	60.7357	1.16619	5.99507	1.14286	1.13219
100503965_at	Gm12167	predicted gene 12167	1.01223	54.2028	1.01669	35.7106	1.02912	27.3308
100503969_at	1810008I18Rik	RIKEN cDNA 1810008I18 gene	-1.44196	0.748121	1.42155	0.308961	-1.01436	36.5645
100503970_at	AY761185	cDNA sequence AY761185	1.80357	0.104308	-1.68318	0.0296712	1.07153	16.9924
100503991_at	Acp4	acid phosphatase 4	-1.00504	60.7357	1.002	42.8252	-1.00304	36.5645
100503992_at	Gm6040	predicted gene 6040	1.07493	42.041	-1.16583	5.99507	-1.08456	16.9924
100503999_at	Gm20005	predicted gene, 20005	1.50105	1.50007	1.08233	35.7106	1.62464	0.111227
100504007_at	Gm15787	predicted gene 15787	-1.54878	0.748121	2.16755	0.0296712	1.39952	0.0469889
100504014_at	Gm15056	predicted gene 15056	3.598	0	-3.56599	0	1.00897	31.9769
100504018_at	Gm20016	predicted gene, 20016	1.30605	1.50007	-1.17972	5.99507	1.10709	1.13219
100504026_at	Gm16157	predicted gene 16157	-1.01161	60.7357	-1.14665	14.3309	-1.15997	1.13219
100504029_at	Gm16740	predicted gene, 16740	-1.15025	25.0856	-1.13114	14.3309	-1.30109	1.13219
100504036_at	Gm20026	transcription elongation factor B polypeptide 1-like	-1.02121	60.7357	1.27087	2.18295	1.24448	2.97913
100504039_at	LOC100504039	uncharacterized LOC100504039	1.33965	6.16911	-1.12659	26.6761	1.18912	7.52666
100504049_at	Gm15559	predicted gene 15559	-1.10446	42.041	-1.16763	5.99507	-1.2896	1.13219
100504056_at	Gm20036	predicted gene, 20036	-1.18978	6.16911	1.02845	35.7106	-1.15687	1.13219
100504061_at	8030451A03Rik	RIKEN cDNA 8030451A03 gene	-1.01606	60.7357	-1.08245	14.3309	-1.09984	27.3308
100504069_at	Gm15915	predicted gene 15915	1.09731	25.0856	1.06738	26.6761	1.17124	2.97913
100504070_at	Gm20043	predicted gene, 20043	1.05401	42.041	-1.05975	26.6761	-1.00545	36.5645
100504078_at	Gm20049	phosphatidylinositol-glycan biosynthesis class X protein-like	1.16284	6.16911	-1.27076	0.308961	-1.09281	2.97913
100504101_at	Gm20063	predicted gene, 20063	-1.07412	54.2028	1.51783	0.130668	1.4131	0.111227
100504104_at	Gm16062	predicted gene 16062	1.3222	1.50007	-1.63372	0.308961	-1.23561	16.9924
100504112_at	Ccer2	coiled-coil glutamate-rich protein 2	1.11963	25.0856	1.21346	5.99507	1.35863	0.111227
100504114_at	Gm16907	predicted gene, 16907	-1.16624	25.0856	1.04054	35.7106	-1.12081	2.97913
100504116_at	Gm20071	predicted gene, 20071	1.08835	25.0856	1.02767	35.7106	1.11847	2.97913
100504121_at	Med9os	mediator complex subunit 9, opposite strand	-1.0018	60.7357	1.01058	41.0315	1.00877	31.9769
100504141_at	Gm20083	predicted gene, 20083	1.08425	42.041	1.39608	0.308961	1.5137	0.111227
100504154_at	Gm15050	predicted gene 15050	1.13338	12.3562	-1.23723	2.18295	-1.09163	16.9924
100504156_at	Fam181a	family with sequence similarity 181, member A	1.01864	54.2028	1.04254	35.7106	1.06198	16.9924
100504157_at	Gm20091	cytochrome c oxidase, subunit VIIc pseudogene	1.22458	2.9847	1.14212	5.99507	1.39861	0.0148586
100504162_at	Prss51	protease, serine 51	1.10637	42.041	1.12027	26.6761	1.23944	1.13219
100504164_at	Cmtm1	CKLF-like MARVEL transmembrane domain containing 1	-1.00174	60.7357	1.42724	2.18295	1.42475	2.97913
100504166_at	4933421O10Rik	RIKEN cDNA 4933421O10 gene	-1.20649	12.3562	-1.18793	2.18295	-1.43323	0.111227
100504169_at	Gm20098	predicted gene, 20098	-1.02193	60.7357	1.36234	0.803127	1.33311	1.13219
100504173_at	Gm15466	predicted gene 15466	1.07624	25.0856	1.12513	14.3309	1.21091	1.13219
100504177_at	F730016J06Rik	RIKEN cDNA F730016J06 gene	-3.21807	0	1.97033	0	-1.63327	0
100504178_at	Dhrs13os	dehydrogenase/reductase (SDR family) member 13, opposite strand	-1.13012	25.0856	1.04611	35.7106	-1.0803	16.9924
100504180_at	LOC100504180	double homeobox protein 4-like	-1.03741	60.7357	2.00857	0.803127	1.93614	2.97913
100504183_at	Krtap16-1	keratin associated protein 16-1	1.1357	25.0856	1.24912	2.18295	1.41863	0.482549
100504184_at	Gm16336	predicted gene 16336	-1.07188	57.704	1.62907	0.130668	1.51982	0.0469889
100504191_at	Gm16576	predicted gene 16576	-1.53428	0.301356	1.20564	0.803127	-1.27259	1.13219
100504195_at	Micalcl	MICAL C-terminal like	-1.06164	54.2028	1.04789	26.6761	-1.01312	36.5645
100504200_at	Gm8050	predicted gene 8050	-1.20641	42.041	1.23823	14.3309	1.02637	31.9769
100504202_at	Gm20110	predicted gene, 20110	-1.00834	60.7357	1.20472	5.99507	1.19475	2.97913
100504207_at	Arhgap33os	Rho GTPase activating protein 33, opposite strand	1.04709	42.041	1.2618	2.18295	1.32122	0.482549
100504221_at	Efcab8	EF-hand calcium binding domain 8	1.00784	54.2028	1.02915	35.7106	1.03721	16.9924
100504231_at	Gm15708	predicted gene 15708	-1.21796	12.3562	1.03735	35.7106	-1.17411	7.52666
100504232_at	Mptx2	mucosal pentraxin 2	1.00905	54.2028	1.08115	26.6761	1.09093	16.9924
100504234_at	Ccdc170	coiled-coil domain containing 170	1.04678	42.041	-1.03322	35.7106	1.01313	31.9769
100504235_at	Gm20125	predicted gene, 20125	-1.03408	60.0813	1.20166	5.99507	1.16206	2.97913
100504249_at	Gm15350	predicted gene 15350	-1.62869	0.301356	1.09429	26.6761	-1.48836	0.482549
100504255_at	Gm12159	predicted gene 12159	-1.12573	42.041	1.04842	35.7106	-1.07374	27.3308
100504262_at	A730020E08Rik	RIKEN cDNA A730020E08 gene	1.21024	6.16911	-1.10894	26.6761	1.09135	16.9924
100504265_at	Gm20139	predicted gene, 20139	1.27634	2.9847	1.1782	5.99507	1.50378	0.482549
100504267_at	Trp53cor1	tumor protein p53 pathway corepressor 1	-1.03231	60.7357	1.41454	0.130668	1.37026	0.224685
100504268_at	2310005A03Rik	RIKEN cDNA 2310005A03 gene	1.07061	42.041	1.39733	0.308961	1.496	0.224685
100504283_at	Gm20149	predicted gene, 20149	1.20956	6.16911	-1.0632	26.6761	1.13765	7.52666
100504285_at	Abhd12b	abhydrolase domain containing 12B	-1.00789	60.7357	1.06424	26.6761	1.05591	27.3308
100504292_at	Gm20153	predicted gene, 20153	1.06656	42.041	-1.01949	42.8252	1.04618	16.9924
100504304_at	Gm20161	predicted gene, 20161	-1.10026	42.041	1.08017	26.6761	-1.0186	36.5645
100504308_at	Gm15473	predicted gene 15473	1.2421	12.3562	-1.15062	26.6761	1.07951	27.3308
100504309_at	Smim27	small integral membrane protein 27	-1.21809	2.9847	-1.07956	26.6761	-1.315	0.482549
100504312_at	Gm17597	predicted gene, 17597	1.03661	42.041	1.52825	0.308961	1.5842	0.224685
100504323_at	Gm20172	predicted gene, 20172	-1.06392	57.704	1.0833	26.6761	1.01822	31.9769
100504333_at	Gm16712	predicted gene, 16712	1.34554	6.16911	-2.1579	0	-1.60375	0.482549
100504347_at	Gm20187	predicted gene, 20187	1.00496	54.2028	1.26719	0.803127	1.27348	0.224685
100504350_at	Gm14169	predicted gene 14169	1.04874	42.041	1.05145	35.7106	1.1027	16.9924
100504360_at	D730003I15Rik	RIKEN cDNA D730003I15 gene	-1.05317	57.704	1.10698	14.3309	1.05109	27.3308
100504361_at	Gm14230	predicted gene 14230	1.36885	2.9847	1.03074	35.7106	1.41094	0.224685
100504375_at	Gm15880	predicted gene 15880	1.18257	12.3562	-1.0641	26.6761	1.11133	7.52666
100504399_at	C130021I20Rik	Riken cDNA C130021I20 gene	-1.13105	42.041	1.48162	2.18295	1.30995	2.97913
100504400_at	Cypt14	cysteine-rich perinuclear theca 14	-1.02529	60.7357	1.59529	0.308961	1.55594	0.224685
100504404_at	H2-Ea-ps	histocompatibility 2, class II antigen E alpha, pseudogene	-1.05389	57.704	-4.04986	0	-4.26812	0
100504412_at	Kcnmb4os2	potassium large conductance calcium-activated channel, subfamily M, beta member 4, opposite strand 2	1.02619	54.2028	-1.05936	35.7106	-1.03233	34.5868
100504421_at	2900076A07Rik	RIKEN cDNA 2900076A07 gene	-1.17935	25.0856	-1.23374	2.18295	-1.45501	0.224685
100504425_at	Gm20219	predicted gene, 20219	-1.08375	42.041	1.293	2.18295	1.19307	7.52666
100504429_at	Spin2d	spindlin family, member 2D	1.00961	54.2028	3.16033	0	3.1907	0
100504446_at	Prr22	proline rich 22	-1.06683	60.7357	2.44305	0.0201689	2.29001	0.0469889
100504455_at	Gm15834	predicted gene 15834	1.01722	54.2028	1.16629	2.18295	1.18637	2.97913
100504457_at	4921513H07Rik	RIKEN cDNA 4921513H07 gene	1.03493	54.2028	-1.08005	14.3309	-1.0436	34.5868
100504461_at	5430401H09Rik	RIKEN cDNA 5430401H09 gene	-1.40467	0.748121	1.06002	26.6761	-1.32513	0.111227
100504464_at	E230016K23Rik	RIKEN cDNA E230016K23 gene	1.16468	12.3562	1.01047	41.0315	1.17687	2.97913
100504467_at	Gm16596	predicted gene, 16596	1.06337	42.041	1.21779	5.99507	1.29496	0.224685
100504474_at	Smlr1	small leucine-rich protein 1	1.00045	54.2028	1.08271	14.3309	1.0832	7.52666
100504483_at	Cbx3-ps7	chromobox 3, pseudogene 7	1.3368	2.9847	-1.73589	0.0451547	-1.29854	0.482549
100504486_at	Gdap10	ganglioside-induced differentiation-associated-protein 10	1.05556	42.041	1.73138	0.0296712	1.82758	0.0148586
100504488_at	Gm3164	predicted gene 3164	-1.07332	57.704	2.20595	0.308961	2.05525	1.13219
100504491_at	Dcdc2b	doublecortin domain containing 2b	1.09655	42.041	-1.07963	35.7106	1.01568	31.9769
100504493_at	Gm13605	predicted gene 13605	1.0407	42.041	1.11258	14.3309	1.15786	2.97913
100504501_at	Gm20257	caspase 8 pseudogene	-4.20558	0	-1.22174	14.3309	-5.13812	0
100504512_at	4930426I24Rik	RIKEN cDNA 4930426I24 gene	-1.03747	60.0813	1.05958	26.6761	1.02131	31.9769
100504518_at	3425401B19Rik	RIKEN cDNA 3425401B19 gene	-1.1376	25.0856	1.30518	2.18295	1.14731	7.52666
100504524_at	Cisd3b	CDGSH iron sulfur domain 3B	2.12144	0.0881706	-1.38219	2.18295	1.53484	1.13219
100504525_at	Gm20268	predicted gene, 20268	1.04551	42.041	-1.06489	26.6761	-1.01853	34.5868
100504539_at	Gm20275	predicted gene, 20275	1.02806	54.2028	-1.09768	26.6761	-1.06772	27.3308
100504549_at	AI463170	expressed sequence AI463170	-1.26012	6.16911	1.31819	0.130668	1.04608	27.3308
100504561_at	9230112J17Rik	RIKEN cDNA 9230112J17 gene	-1.06328	57.704	-1.01453	42.8252	-1.07874	27.3308
100504568_at	Gm17634	predicted gene, 17634	-1.0212	60.7357	1.0047	42.8252	-1.01642	36.071
100504586_at	Gm20300	predicted gene, 20300	-1.59465	0.301356	-1.01342	42.8252	-1.61606	0.224685
100504589_at	Gm11454	predicted gene 11454	1.06233	42.041	1.01964	41.0315	1.0832	7.52666
100504591_at	Gm15987	predicted gene 15987	3.46142	0	-4.49992	0	-1.30002	1.13219
100504594_at	A630012P03Rik	RIKEN cDNA A630012P03 gene	1.12967	12.3562	-1.13829	5.99507	-1.00763	36.5645
100504601_at	Gm16702	predicted gene, 16702	1.1484	12.3562	1.04409	35.7106	1.19903	2.97913
100504608_at	Mettl21b	methyltransferase like 21B	1.24476	12.3562	1.06879	35.7106	1.33038	2.97913
100504616_at	Gm15910	predicted gene 15910	-1.71964	0.104308	1.42892	0.130668	-1.20345	2.97913
100504626_at	Gm16364	predicted gene 16364	1.09994	42.041	1.07617	35.7106	1.18372	2.97913
100504628_at	Gm20319	predicted gene, 20319	1.51264	0.748121	-1.05229	35.7106	1.43747	0.482549
100504637_at	Gm20324	predicted gene, 20324	-1.22658	6.16911	1.09941	14.3309	-1.11567	16.9924
100504641_at	1700101I11Rik	RIKEN cDNA 1700101I11 gene	-1.00347	60.7357	-1.14904	14.3309	-1.15303	16.9924
100504652_at	Gm12880	predicted gene 12880	-1.15575	25.0856	1.11561	14.3309	-1.03598	34.5868
100504653_at	4930555A03Rik	RIKEN cDNA 4930555A03 gene	-1.0365	60.7357	-1.2509	0.308961	-1.29655	1.13219
100504661_at	Gm20337	predicted gene, 20337	1.12121	25.0856	-1.01063	42.8252	1.10942	7.52666
100504663_at	Atg14	autophagy related 14	-1.16472	12.3562	1.10278	26.6761	-1.05617	31.9769
100504675_at	Gm15327	predicted gene 15327	-1.12882	42.041	1.12016	14.3309	-1.00773	36.5645
100504687_at	2810029C07Rik	RIKEN cDNA 2810029C07 gene	1.07297	42.041	-1.01753	41.0315	1.05449	27.3308
100504689_at	Plscr5	phospholipid scramblase family, member 5	1.01659	54.2028	1.17638	2.18295	1.19589	1.13219
100504692_at	Gm20356	predicted gene, 20356	1.10191	25.0856	-1.1363	14.3309	-1.03121	34.5868
100504701_at	Gm20362	predicted gene, 20362	-1.06641	57.704	-1.02095	41.0315	-1.08874	27.3308
100504703_at	A730063M14Rik	RIKEN cDNA A730063M14 gene	1.12914	12.3562	-1.17527	2.18295	-1.04085	34.5868
100504710_at	Nat8f6	N-acetyltransferase 8 (GCN5-related) family member 6	1.36849	0.748121	-1.36666	0.308961	1.00134	31.9769
100504714_at	Gm16793	predicted gene, 16793	-1.08364	54.2028	1.42558	0.130668	1.31555	0.482549
100504715_at	Tmppe	transmembrane protein with metallophosphoesterase domain	-1.26711	2.9847	1.36221	0.308961	1.07505	16.9924
100504717_at	Gm12709	predicted gene 12709	1.08777	25.0856	-1.01028	42.8252	1.0767	7.52666
100504720_at	2310002F09Rik	RIKEN cDNA 2310002F09 gene	-1.25807	12.3562	1.26868	5.99507	1.00843	31.9769
100504727_at	BE692007	expressed sequence BE692007	-4.38823	0	-1.92295	0.308961	-8.43834	0
100504728_at	Gm13985	predicted gene 13985	-1.12204	25.0856	1.17069	5.99507	1.04336	27.3308
100504733_at	A730018C14Rik	RIKEN cDNA A730018C14 gene	-1.04825	60.0813	1.24835	5.99507	1.19089	7.52666
100504734_at	Gm16794	predicted gene, 16794	-1.06224	60.0813	1.04147	35.7106	-1.01995	36.5645
100504740_at	Gm20383	predicted gene, 20383	1.14762	42.041	-1.10331	35.7106	1.04016	31.9769
100505025_at	4930429H19Rik	RIKEN cDNA 4930429H19 gene	-1.02298	60.7357	1.05895	26.6761	1.03516	16.9924
100505034_at	Gm29695	predicted gene, 29695	1.06666	42.041	-1.07752	26.6761	-1.01018	36.5645
100515_at	Zfp518b	zinc finger protein 518B	-1.00683	60.7357	1.06292	26.6761	1.05571	16.9924
100526460_at	Mir1264	microRNA 1264	1.03577	54.2028	-1.30983	0.803127	-1.26459	0.482549
100526461_at	Mir1249	microRNA 1249	-1.33006	2.9847	1.39091	0.803127	1.04575	27.3308
100526462_at	Mir1298	microRNA 1298	-1.0077	60.7357	-1.01076	42.8252	-1.01855	36.5645
100526463_at	Mir3058	microRNA 3058	-1.39042	1.50007	1.95192	0.0296712	1.40383	0.111227
100526464_at	Mir3106	microRNA 3106	1.09492	25.0856	-1.10673	14.3309	-1.01078	36.5645
100526465_at	Mir3057	microRNA 3057	-1.20643	12.3562	1.35838	2.18295	1.12595	16.9924
100526466_at	Mir3060	microRNA 3060	-1.27882	12.3562	1.18364	14.3309	-1.08041	27.3308
100526467_at	Mir3061	microRNA 3061	-1.0678	57.704	-1.85295	0.130668	-1.97858	0.224685
100526469_at	Mir3064	microRNA 3064	-1.26497	1.50007	1.27913	0.308961	1.01119	31.9769
100526470_at	Mir3066	microRNA 3066	1.30536	1.50007	-1.19208	0.803127	1.09503	7.52666
100526472_at	Mir3070a	microRNA 3070a	1.17904	12.3562	-1.42198	0.308961	-1.20605	1.13219
100526474_at	Mir3074-1	microRNA 3074-1	-1.17378	25.0856	1.14563	14.3309	-1.02457	36.5645
100526475_at	Mir3076	microRNA 3076	-1.19966	25.0856	1.12809	26.6761	-1.06344	34.5868
100526477_at	Mir3080	microRNA 3080	1.00668	54.2028	-1.06958	26.6761	-1.06249	16.9924
100526478_at	Mir3081	microRNA 3081	-1.01697	60.7357	-1.91544	0.0451547	-1.94794	0.0469889
100526479_at	Mir3082	microRNA 3082	-1.47635	1.50007	1.68208	0.308961	1.13935	16.9924
100526480_at	Mir3086	microRNA 3086	-1.0062	60.7357	-1.1729	2.18295	-1.18018	1.13219
100526482_at	Mir466o	microRNA 466o	1.23097	6.16911	-1.34806	0.803127	-1.09512	7.52666
100526497_at	Mir466p	microRNA 466p	-1.24703	12.3562	-1.15357	14.3309	-1.43854	0.111227
100526498_at	Mir3088	microRNA 3088	-1.10865	54.2028	1.24371	5.99507	1.12183	16.9924
100526499_at	Mir3089	microRNA 3089	-1.13332	42.041	1.36498	0.803127	1.20441	2.97913
100526500_at	Mir3090	microRNA 3090	-1.11677	42.041	1.45788	0.803127	1.30544	0.482549
100526501_at	Mir3094	microRNA 3094	1.01231	54.2028	1.06404	26.6761	1.07713	16.9924
100526502_at	Mir3095	microRNA 3095	-2.31296	0.104308	-1.25551	2.18295	-2.90396	0.0148586
100526505_at	Mir3101	microRNA 3101	-1.91996	0.0546658	1.4867	0.0296712	-1.29142	0.224685
100526506_at	Mir344c	microRNA 344c	1.1735	12.3562	-1.33529	0.803127	-1.13787	16.9924
100526508_at	Mir3102	microRNA 3102	1.06602	42.041	-1.18189	5.99507	-1.1087	27.3308
100526509_at	Mir3104	microRNA 3104	2.06375	0.0546658	-2.16449	0	-1.04881	34.5868
100526510_at	Mir3107	microRNA 3107	1.03152	54.2028	1.38762	0.130668	1.43136	0.0148586
100526511_at	Mir3108	microRNA 3108	-1.37342	1.50007	1.12749	14.3309	-1.21812	2.97913
100526512_at	Mir3110	microRNA 3110	-1.29755	2.9847	1.96424	0	1.51381	0.111227
100526513_at	Mir374c	microRNA 374c	1.08772	42.041	-1.20548	2.18295	-1.10827	7.52666
100526515_at	Mir1247	microRNA 1247	1.28597	12.3562	-2.03099	0.0296712	-1.57935	2.97913
100526516_at	Mir3059	microRNA 3059	1.21508	12.3562	-1.93066	0	-1.58891	0.224685
100526517_at	Mir1251	microRNA 1251	1.20424	2.9847	-1.24801	0.308961	-1.03635	31.9769
100526518_at	Mir3065	microRNA 3065	-1.14738	42.041	1.61598	0.308961	1.40841	1.13219
100526519_at	Mir3070b	microRNA 3070b	-1.0149	60.7357	1.71669	0.130668	1.69149	1.13219
100526524_at	Mir466n	microRNA 466n	1.09571	25.0856	-1.19195	14.3309	-1.08783	27.3308
100526525_at	Mir3092	microRNA 3092	1.15125	25.0856	1.00894	42.8252	1.16155	7.52666
100526526_at	Mir3098	microRNA 3098	1.12454	42.041	-1.15108	26.6761	-1.02361	36.5645
100526527_at	Mir344f	microRNA Mir344f	1.36462	6.16911	-1.32719	5.99507	1.0282	31.9769
100526528_at	Mir3074-2	microRNA 3074-2	-1.02999	60.7357	-1.35387	2.18295	-1.39447	0.111227
100526529_at	Mir1912	microRNA 1912	1.04512	42.041	1.2885	0.803127	1.34663	0.0469889
100526531_at	Mir344d-2	microRNA 344d-2	1.04429	54.2028	2.34949	0	2.45354	0
100526532_at	Mir3067	microRNA 3067	1.07519	42.041	-1.15972	14.3309	-1.07862	7.52666
100526533_at	Mir3075	microRNA 3075	-1.14349	42.041	-1.12392	14.3309	-1.28519	1.13219
100526534_at	Mir3083	microRNA 3083	1.08756	42.041	-1.44812	0.803127	-1.33154	7.52666
100526540_at	Mir3093	microRNA 3093	1.14488	25.0856	1.25256	5.99507	1.43404	2.97913
100526541_at	Mir344e	microRNA 344e	1.22402	6.16911	-1.04326	35.7106	1.17326	2.97913
100526543_at	Mir344d-3	microRNA 344d-3	-1.046	57.704	-1.01856	41.0315	-1.06541	27.3308
100526544_at	Mir344d-1	microRNA 344d-1	-1.00824	60.7357	1.02454	35.7106	1.01617	31.9769
100526545_at	Mir3062	microRNA 3062	-1.00742	60.7357	1.12103	5.99507	1.11277	7.52666
100526546_at	Mir3068	microRNA 3068	1.169	25.0856	-1.80274	0.130668	-1.54212	0.111227
100526547_at	Mir3073a	microRNA 3073a	-1.04106	60.0813	1.01418	41.0315	-1.0265	36.5645
100526548_at	Mir3079	microRNA 3079	-1.00814	60.7357	1.02423	35.7106	1.01595	31.9769
100526549_at	Mir3085	microRNA 3085	-1.19495	12.3562	1.27696	2.18295	1.06863	27.3308
100526555_at	Mir3087	microRNA 3087	-1.10663	54.2028	-1.34339	2.18295	-1.48663	0.111227
100526556_at	Mir3091	microRNA 3091	-1.08716	54.2028	1.01514	41.0315	-1.07095	27.3308
100526557_at	Mir3097	microRNA 3097	-1.35508	12.3562	1.58963	2.18295	1.17309	16.9924
100526558_at	Mir344b	microRNA 344b	1.10033	25.0856	-1.11488	14.3309	-1.01322	36.5645
100526559_at	Mir3103	microRNA 3103	-1.29155	2.9847	1.17595	14.3309	-1.0983	31.9769
100526560_at	Mir3109	microRNA 3109	-1.42939	1.50007	2.81209	0	1.96733	0.0148586
100526562_at	Mir3105	microRNA 3105	1.03308	42.041	-1.01539	41.0315	1.01742	31.9769
100526796_at	Cahm	colon adenocarcinoma hypermethylated RNA	-1.05619	57.704	-1.07216	14.3309	-1.1324	7.52666
100529074_at	Snora33	small nucleolar RNA, H/ACA box 33	-1.19504	42.041	-1.76451	0.0296712	-2.10866	0.111227
100529075_at	Snord100	small nucleolar RNA, C/D box 100	-1.40433	1.50007	1.20629	5.99507	-1.16418	2.97913
100529076_at	Snord42a	small nucleolar RNA, C/D box 42A	-2.32599	0.0546658	-1.57916	0.130668	-3.67313	0
100529077_at	Snord42b	small nucleolar RNA, C/D box 42B	-2.03158	0.0881706	-1.10726	26.6761	-2.24948	0.0148586
100529079_at	5830418P13Rik	RIKEN cDNA 5830418P13 gene	-1.08848	42.041	1.1758	5.99507	1.08022	16.9924
100529082_at	Gm11127	predicted gene 11127	1.04184	54.2028	-1.17441	14.3309	-1.12724	16.9924
100532_at	Rell1	RELT-like 1	-1.11663	25.0856	-1.03257	35.7106	-1.153	2.97913
100532730_at	C230037L18Rik	RIKEN cDNA C230037L18 gene	-1.32021	6.16911	-1.2193	14.3309	-1.60973	0.224685
100534273_at	Fer1l5	fer-1-like 5 (C. elegans)	-1.07618	54.2028	1	42.8252	-1.07618	27.3308
100534633_at	Gm15008	predicted gene 15008	1.07779	42.041	1.02083	41.0315	1.10024	2.97913
100535_at	Oas1d	2'-5' oligoadenylate synthetase 1D	1.09383	25.0856	-1.05945	26.6761	1.03245	27.3308
100559_at	Ugt2b38	UDP glucuronosyltransferase 2 family, polypeptide B38	-1.01057	60.7357	-1.02519	41.0315	-1.03602	34.5868
100561_at	Slc15a4	solute carrier family 15, member 4	-1.27826	1.50007	-1.3659	0.308961	-1.74597	0.0148586
100579147_at	Gm10619	predicted gene 10619	-1.18522	12.3562	1.32201	0.803127	1.11541	7.52666
100579151_at	Gm16833	predicted gene, 16833	-1.14076	12.3562	-1.0786	26.6761	-1.23043	1.13219
100604_at	Lrrc8c	leucine rich repeat containing 8 family, member C	1.27733	2.9847	-1.47669	0.130668	-1.15608	0.224685
100608_at	Noc4l	NOC4 like	1.83599	0.0546658	-1.6016	0.0451547	1.14635	7.52666
100609_at	Nsun5	NOL1/NOP2/Sun domain family, member 5	1.50344	0.301356	-1.44266	0.130668	1.04214	27.3308
100616095_at	Snhg18	small nucleolar RNA host gene 18	1.16189	12.3562	1.0829	26.6761	1.25821	1.13219
100628567_at	Mir28c	microRNA 28c	1.00044	54.2028	-1.28787	2.18295	-1.2873	0.224685
100628568_at	Mir3963	microRNA 3963	1.12006	12.3562	-1.10335	14.3309	1.01514	31.9769
100628570_at	Mir3965	microRNA 3965	-1.01325	60.7357	-1.00876	42.8252	-1.02212	36.5645
100628571_at	Mir378b	microRNA 378b	-1.09309	54.2028	1.38991	0.308961	1.27154	1.13219
100628573_at	Mir3969	microRNA 3969	1.00871	54.2028	-1.12452	5.99507	-1.11481	7.52666
100628574_at	Mir28b	microRNA 28b	-1.11049	54.2028	4.78116	0	4.30545	0
100628575_at	Mir3970	microRNA 3970	1.01658	54.2028	-1.1247	5.99507	-1.10636	7.52666
100628577_at	Mir5098	microRNA 5098	1.11508	42.041	1.49934	0.308961	1.67188	1.13219
100628578_at	Mir5099	microRNA 5099	1.40505	0.192905	-1.07375	14.3309	1.30854	0.0469889
100628580_at	Mir5103	microRNA 5103	-1.29744	2.9847	1.3633	0.308961	1.05076	16.9924
100628581_at	Mir5104	microRNA 5104	-1.21202	6.16911	-1.25589	5.99507	-1.52217	0.482549
100628582_at	Mir3473c	microRNA 3473c	-1.0689	54.2028	-1.08908	26.6761	-1.16412	2.97913
100628583_at	Mir5108	microRNA 5108	1.19215	6.16911	-1.24275	0.803127	-1.04244	34.5868
100628586_at	Mir5112	microRNA 5112	1.19035	12.3562	-1.11525	14.3309	1.06733	27.3308
100628589_at	Mir5118	microRNA 5118	-1.07713	54.2028	1.18264	5.99507	1.09796	7.52666
100628590_at	Mir5120	microRNA 5120	-1.246	12.3562	-1.68914	0.130668	-2.10467	0.0469889
100628592_at	Mir3473d	microRNA 3473d	1.07205	42.041	1.56515	0.0296712	1.67792	0
100628594_at	Mir3572	microRNA 3572	-1.06314	60.0813	1.00956	42.8252	-1.05307	27.3308
100628596_at	Mir5127	microRNA 5127	1.05567	42.041	-1.71976	0.0296712	-1.62908	0.0469889
100628597_at	Mir5128	microRNA 5128	-1.00007	60.7357	-1.52754	0.0296712	-1.52765	0.0148586
100628598_at	Mir5129	microRNA 5129	-1.07636	57.704	1.63752	0.308961	1.52135	0
100628603_at	Mir5134	microRNA 5134	1.09741	42.041	1.15279	26.6761	1.26509	7.52666
100628604_at	Mir5135	microRNA 5135	-1.06357	57.704	1.34559	0.308961	1.26516	1.13219
100628607_at	Mir3964	microRNA 3964	1.09766	25.0856	-1.09139	14.3309	1.00574	31.9769
100628609_at	Mir3473b	microRNA 3473b	1.10009	42.041	1.11279	26.6761	1.22416	7.52666
100628611_at	Mir5107	microRNA 5107	-1.03507	60.7357	-1.43688	2.18295	-1.48727	2.97913
100628613_at	Mir5119	microRNA 5119	-1.22002	12.3562	-1.05305	35.7106	-1.28474	2.97913
100628615_at	Mir3962	microRNA 3962	-1.05005	57.704	1.63648	0.803127	1.55848	1.13219
100628616_at	Mir3966	microRNA 3966	1.16189	25.0856	-1.26714	2.18295	-1.09058	7.52666
100628618_at	Mir5106	microRNA 5106	1.04351	42.041	-1.13137	14.3309	-1.0842	7.52666
100628621_at	Mir3961	microRNA 3961	-1.21136	25.0856	1.34459	2.18295	1.10998	27.3308
100628623_at	Mir3968	microRNA 3968	-1.23122	6.16911	1.08681	26.6761	-1.13287	7.52666
100628625_at	Mir5100	microRNA 5100	-1.44051	2.9847	1.48558	0.308961	1.03129	31.9769
100628627_at	Mir5110	microRNA 5110	-1.05982	54.2028	1.09752	14.3309	1.03558	16.9924
100628629_at	Mir5121	microRNA 5121	1.23438	6.16911	-1.5982	0.130668	-1.29474	0.482549
100628630_at	Mir5124a	microRNA 5124a	1.10547	25.0856	1.15807	14.3309	1.28021	2.97913
100637_at	N4bp2l1	NEDD4 binding protein 2-like 1	-2.22958	0	-1.01989	41.0315	-2.27392	0
100642166_at	Gm15446	predicted gene 15446	-1.09412	54.2028	1.59069	0.130668	1.45385	0.482549
100647_at	Upk3b	uroplakin 3B	1.14228	25.0856	-1.00621	43.2839	1.13522	7.52666
100653389_at	Mir155hg	Mir155 host gene (non-protein coding)	3.75222	0	-3.87626	0	-1.03306	36.5645
100662_at	D930016D06Rik	RIKEN cDNA D930016D06 gene	1.01261	54.2028	-1.16434	26.6761	-1.14984	7.52666
100675_at	AI480526	expressed sequence AI480526	-1.7568	0.0881706	1.13617	14.3309	-1.54625	0.111227
100678_at	Psph	phosphoserine phosphatase	1.11414	25.0856	1.02157	41.0315	1.13817	2.97913
100683_at	Trrap	transformation/transcription domain-associated protein	-1.16427	6.16911	1.01004	41.0315	-1.15269	1.13219
100689_at	Spon2	spondin 2, extracellular matrix protein	1.0364	54.2028	1.08247	26.6761	1.12187	2.97913
100689703_at	9330133O14Rik	RIKEN cDNA 9330133O14 gene	1.23648	2.9847	-1.7115	0	-1.38417	0.0148586
100705_at	Acacb	acetyl-Coenzyme A carboxylase beta	1.06486	42.041	-1.15559	5.99507	-1.0852	27.3308
100710_at	Pds5b	PDS5 cohesin associated factor B	-1.1662	6.16911	-1.52641	0.0201689	-1.78009	0
100715_at	Papd4	PAP associated domain containing 4	1.11108	25.0856	-1.07011	14.3309	1.03828	27.3308
100727_at	Ugt2b34	UDP glucuronosyltransferase 2 family, polypeptide B34	1.05118	42.041	1.02244	35.7106	1.07477	16.9924
100732_at	Mapre3	microtubule-associated protein, RP/EB family, member 3	1.0741	42.041	-1.09708	14.3309	-1.02139	36.071
100736249_at	Mira	mistral long non-coding RNA	1.10353	25.0856	-1.08544	14.3309	1.01666	31.9769
100737_at	Dcun1d4	DCN1, defective in cullin neddylation 1, domain containing 4 (S. cerevisiae)	1.16502	12.3562	-1.25683	2.18295	-1.07881	7.52666
100740_at	AI839979	expressed sequence AI839979	2.20908	0	-1.10308	26.6761	2.00266	0
100756_at	Usp30	ubiquitin specific peptidase 30	-1.01435	60.7357	-1.27598	2.18295	-1.29428	1.13219
100763_at	Ube3c	ubiquitin protein ligase E3C	1.27146	2.9847	-1.32878	0.130668	-1.04508	31.9769
100764_at	Rita1	RBPJ interacting and tubulin associated 1	1.10355	42.041	-1.11759	26.6761	-1.01272	36.5645
100775173_at	Ighv1-74	immunoglobulin heavy variable V1-74	1.16141	25.0856	-1.36206	0.803127	-1.17276	1.13219
100775174_at	Ighv1-76	immunoglobulin heavy variable 1-76	-1.08772	54.2028	-2.93178	0	-3.18894	0
100775175_at	Ighv1-82	immunoglobulin heavy variable 1-82	-1.45389	2.9847	-4.55826	0	-6.62719	0
100855_at	Tbc1d14	TBC1 domain family, member 14	-1.48402	0.192905	3.2348	0	2.17976	0
100859962_at	Gm21057	predicted gene, 21057	-3.35945	0	1.31675	0.803127	-2.55131	0
100861491_at	n-R5s136	nuclear encoded rRNA 5S 136	-2.78043	0.0881706	1.98943	0.130668	-1.3976	7.52666
100861570_at	DQ267100	snoRNA DQ267100	1.02294	54.2028	1.3944	0.130668	1.42639	1.13219
100861571_at	DQ267101	snoRNA DQ267101	1.07936	25.0856	-1.02314	41.0315	1.05495	27.3308
100861572_at	DQ267102	snoRNA DQ267102	1.11103	42.041	1.43662	0.803127	1.59613	0.111227
100861598_at	Gm21064	predicted gene, 21064	1.13964	42.041	-1.42234	2.18295	-1.24806	2.97913
100861615_at	LOC100861615	alpha takusan-like	-1.17437	42.041	6.45194	0	5.49395	0
100861663_at	Gm21115	predicted gene, 21115	-1.12131	42.041	3.01519	0	2.68898	0
100861673_at	Gm21123	predicted gene, 21123	1.06288	42.041	1.02248	41.0315	1.08677	7.52666
100861679_at	Gm21129	predicted gene, 21129	-1.32492	12.3562	1.88203	0.308961	1.42048	0.482549
100861686_at	Gm21136	predicted gene, 21136	-1.09785	54.2028	1.50626	0.130668	1.37201	0.224685
100861702_at	Gm21149	predicted gene, 21149	1.28173	6.16911	1.28629	5.99507	1.64868	0.111227
100861727_at	LOC100861727	protein FAM205A-like	1.02843	54.2028	1.49902	0.803127	1.54164	7.52666
100861753_at	Gm21188	predicted gene, 21188	-1.16793	12.3562	-2.22868	0	-2.60295	0
100861755_at	Gm21190	predicted gene, 21190	-1.27125	2.9847	5.10963	0	4.01938	0
100861784_at	LOC100861784	ubiquitin-conjugating enzyme E2 L3-like	1.15925	6.16911	-1.18061	0.803127	-1.01842	36.071
100861794_at	Gm21221	predicted gene, 21221	1.12611	25.0856	1.15031	14.3309	1.29538	0.224685
100861814_at	LOC100861814	uncharacterized LOC100861814	1.02798	54.2028	-1.01816	41.0315	1.00964	31.9769
100861851_at	Gm21269	predicted gene, 21269	-1.02161	60.7357	-1.00465	43.2839	-1.02636	31.9769
100861861_at	Gm21276	predicted gene, 21276	1.27554	1.50007	-1.25884	0.130668	1.01327	31.9769
100861869_at	Gm21283	predicted gene, 21283	-1.02468	60.7357	-1.09411	14.3309	-1.12112	27.3308
100861870_at	Gm21284	predicted gene, 21284	1.03065	54.2028	1.01345	41.0315	1.04452	27.3308
100861898_at	Gm21936	predicted gene, 21936	1.09654	42.041	2.16505	0.130668	2.37406	0.111227
100861908_at	Gm21319	predicted gene, 21319	1.41055	12.3562	1.04591	41.0315	1.47531	2.97913
100861913_at	LOC100861913	uncharacterized LOC100861913	-1.41192	0.748121	-1.02041	42.8252	-1.44073	0.111227
100861998_at	Gm21388	predicted gene, 21388	1.17812	12.3562	-1.12051	14.3309	1.05142	27.3308
100862066_at	Cfap99	cilia and flagella associated protein 99	-1.23833	6.16911	1.11972	14.3309	-1.10593	16.9924
100862124_at	Gm15026	predicted gene 15026	1.1195	42.041	-1.34086	2.18295	-1.19774	7.52666
100862175_at	Gm10698	predicted gene 10698	1.50864	0.301356	1.06742	14.3309	1.61035	0.0469889
100862203_at	Gm6712	predicted gene 6712	1.36216	12.3562	-3.16122	0	-2.32074	0.0148586
100862206_at	Gm21559	predicted gene, 21559	1.48545	0.192905	-1.40969	0.0451547	1.05374	16.9924
100862268_at	LOC100862268	uncharacterized LOC100862268	1.01058	54.2028	1.01863	41.0315	1.02941	31.9769
100862349_at	Gm21663	predicted gene, 21663	1.14103	42.041	1.07328	35.7106	1.22465	7.52666
100862359_at	Gm21671	predicted gene, 21671	-2.44718	0.301356	5.36414	0.0296712	2.19197	2.97913
100873092_at	Gm15679	predicted gene 15679	-1.00499	60.7357	-1.0534	35.7106	-1.05865	27.3308
100873094_at	Rubie	RNA upstream of Bmp4 expressed in inner ear	1.16378	12.3562	-1.18333	5.99507	-1.0168	36.5645
100885824_at	Mir299b	microRNA 299b	1.24081	12.3562	-1.97237	0.0451547	-1.58958	0.0148586
100885843_at	Mir344i	microRNA 344i	-1.6003	0.748121	1.82527	0.130668	1.14058	7.52666
100900_at	Hscb	HscB iron-sulfur cluster co-chaperone	1.11543	25.0856	-2.02529	0	-1.81571	0
100910_at	Chpf2	chondroitin polymerizing factor 2	-1.08702	42.041	1.12878	5.99507	1.03843	16.9924
100929_at	Tyw1	tRNA-yW synthesizing protein 1 homolog (S. cerevisiae)	1.03518	42.041	-1.14194	5.99507	-1.10313	7.52666
100952_at	Emilin1	elastin microfibril interfacer 1	1.1216	25.0856	-1.07487	26.6761	1.04348	16.9924
100972_at	Rab28	RAB28, member RAS oncogene family	1.02143	54.2028	-1.25668	2.18295	-1.23032	2.97913
100978_at	Nfxl1	nuclear transcription factor, X-box binding-like 1	1.06573	42.041	-1.09215	14.3309	-1.02479	34.5868
100986_at	Akap9	A kinase (PRKA) anchor protein (yotiao) 9	-1.17242	6.16911	-1.29859	0.308961	-1.52249	0
100993_at	AW549542	expressed sequence AW549542	-1.05988	57.704	1.01329	41.0315	-1.04598	31.9769
100996933_at	Lincred1	long intergenic non-protein coding RNA of erythroid differentiation 1	1.15831	25.0856	-1.03171	41.0315	1.12271	7.52666
101023_at	Zfp513	zinc finger protein 513	-1.02147	60.7357	-1.19103	0.803127	-1.2166	0.224685
101055656_at	LOC101055656	uncharacterized LOC101055656	-1.07158	54.2028	1.10595	5.99507	1.03208	16.9924
101055670_at	Heatr4	HEAT repeat containing 4	1.12489	25.0856	-1.14421	14.3309	-1.01717	36.071
101055711_at	Gm29716	predicted gene, 29716	1.27171	2.9847	-1.24797	2.18295	1.01902	31.9769
101055736_at	Gm38433	predicted gene, 38433	1.13399	25.0856	1.04798	35.7106	1.1884	7.52666
101055745_at	Gm29721	predicted gene, 29721	1.40446	12.3562	1.67302	5.99507	2.34968	0.482549
101055749_at	LOC101055749	Gm5941 pseudogene	1.19482	6.16911	-1.24356	2.18295	-1.04079	31.9769
101055758_at	LOC101055758	component of Sp100-rs-like	-1.11609	54.2028	1.09913	14.3309	-1.01543	36.5645
101055759_at	Gm26592	predicted gene, 26592	-1.01868	60.7357	1.27267	0.803127	1.24933	1.13219
101055769_at	Gm12596	predicted gene 12596	-1.07713	54.2028	1.45481	0.308961	1.35064	0.482549
101055782_at	LOC101055782	uncharacterized LOC101055782	1.12719	25.0856	1.08972	26.6761	1.22833	2.97913
101055805_at	LOC101055805	60S ribosomal protein L31 pseudogene	-1.09412	42.041	-1.0993	14.3309	-1.20277	2.97913
101055836_at	LOC101055836	membrane-spanning 4-domains subfamily A member 6D-like	1.05395	42.041	1.02923	35.7106	1.08476	16.9924
101055837_at	Gm38434	predicted gene, 38434	1.04445	42.041	1.03626	35.7106	1.08232	16.9924
101055907_at	LOC101055907	periphilin-1-like	-1.20683	6.16911	-1.72337	0.0451547	-2.07981	0.0148586
101055909_at	LOC101055909	protein transport protein Sec61 subunit beta pseudogene	1.79601	0.192905	-2.65464	0.0201689	-1.47808	0.224685
101055944_at	LOC101055944	uncharacterized LOC101055944	1.27789	6.16911	1.33353	0.803127	1.70411	0.111227
101055953_at	LOC101055953	39S ribosomal protein L41, mitochondrial-like	-1.29927	25.0856	1.07092	35.7106	-1.21322	16.9924
101055980_at	LOC101055980	electron transfer flavoprotein subunit alpha, mitochondrial pseudogene	-1.07671	60.0813	-1.05993	35.7106	-1.14124	31.9769
101055983_at	Gm14569	predicted gene 14569	1.00358	54.2028	1.1964	14.3309	1.20069	7.52666
101055995_at	LOC101055995	putative E3 ubiquitin-protein ligase UNKL pseudogene	-1.60348	0.301356	-1.06518	35.7106	-1.708	0.111227
101056001_at	LOC101056001	uncharacterized LOC101056001	-1.00025	60.7357	1.40772	2.18295	1.40737	1.13219
101056056_at	LOC101056056	uncharacterized LOC101056056	1.03015	54.2028	-1.61692	0.308961	-1.5696	0.482549
101056073_at	Zfp990	zinc finger protein 990	-1.06147	57.704	-1.02677	41.0315	-1.08989	27.3308
101056115_at	LOC101056115	zinc finger protein 120-like	1.03127	54.2028	-1.07712	14.3309	-1.04445	31.9769
101056136_at	Gm17026	predicted gene 17026	-1.0592	57.704	1.35561	5.99507	1.27984	7.52666
101056149_at	Gm15908	predicted gene 15908	1.14685	12.3562	-1.23541	2.18295	-1.07722	16.9924
101056159_at	LOC101056159	uncharacterized LOC101056159	1.22063	12.3562	1.16286	5.99507	1.41942	0.482549
101056163_at	LOC101056163	14-3-3 protein sigma-like	1.17159	12.3562	-1.07874	35.7106	1.08607	16.9924
101056169_at	LOC101056169	60S ribosomal protein L23a pseudogene	-1.02777	60.7357	2.21161	0	2.15186	0
101056408_at	Gm15816	predicted gene 15816	-1.17779	25.0856	1.22878	5.99507	1.04329	27.3308
101095_at	Zfp282	zinc finger protein 282	-1.17673	25.0856	-1.30359	0.308961	-1.53397	0.224685
101100_at	Ttll3	tubulin tyrosine ligase-like family, member 3	-1.33159	1.50007	-1.0151	42.8252	-1.3517	0.482549
101113_at	Snx21	sorting nexin family member 21	-1.03837	60.0813	1.17034	5.99507	1.12709	2.97913
101118_at	Tmem168	transmembrane protein 168	1.05546	42.041	-1.46753	0.0451547	-1.39042	0.0469889
101122_at	Rpusd3	RNA pseudouridylate synthase domain containing 3	1.15127	25.0856	-1.14596	5.99507	1.00464	31.9769
101142_at	Itfg2	integrin alpha FG-GAP repeat containing 2	1.03467	54.2028	-1.08858	14.3309	-1.0521	31.9769
101148_at	Bmt2	base methyltransferase of 25S rRNA 2	-1.00836	60.7357	-1.00849	42.8252	-1.01692	36.071
101154638_at	Gm5121	40S ribosomal protein S8 pseudogene	1.29801	1.50007	-1.15155	14.3309	1.12718	7.52666
101185_at	Pot1a	protection of telomeres 1A	-1.245	1.50007	-1.37847	0.130668	-1.71621	0
101187_at	Parp11	poly (ADP-ribose) polymerase family, member 11	-1.21342	12.3562	-1.36102	0.308961	-1.65149	0.111227
101197_at	Zfp956	zinc finger protein 956	-1.31569	2.9847	-1.03979	41.0315	-1.36805	0.482549
101202_at	Hepacam2	HEPACAM family member 2	-1.06716	54.2028	1.04592	26.6761	-1.02031	36.5645
101202684_at	Uchl1os	ubiquitin carboxy-terminal hydrolase L1, opposite strand	-1.0178	60.7357	1.03948	26.6761	1.0213	27.3308
101206_at	Tada3	transcriptional adaptor 3	-1.06472	54.2028	-1.10928	14.3309	-1.18108	1.13219
101214_at	Tra2a	transformer 2 alpha	1.03427	42.041	-1.64126	0.0201689	-1.58687	0
101240_at	Wdr91	WD repeat domain 91	-1.41883	0.748121	1.1366	5.99507	-1.2483	0.111227
101314_at	Brk1	BRICK1, SCAR/WAVE actin-nucleating complex subunit	-1.02074	60.7357	1.01592	41.0315	-1.00474	36.5645
101320_at	Dyrk4	dual-specificity tyrosine-(Y)-phosphorylation regulated kinase 4	-1.05811	57.704	-1.10627	26.6761	-1.17056	7.52666
101351_at	Eogt	EGF domain-specific O-linked N-acetylglucosamine (GlcNAc) transferase	-1.08414	54.2028	-1.90318	0	-2.0633	0
101358_at	Fbxl14	F-box and leucine-rich repeat protein 14	1.08528	25.0856	1.0911	14.3309	1.18415	1.13219
101359_at	Prrt4	proline-rich transmembrane protein 4	-1.06255	54.2028	1.15286	5.99507	1.085	7.52666
101401_at	Adamts9	a disintegrin-like and metallopeptidase (reprolysin type) with thrombospondin type 1 motif, 9	-1.09881	54.2028	1.65501	0.0451547	1.50619	0.0469889
101434_at	Ceacam15	carcinoembryonic antigen-related cell adhesion molecule 15	-1.01774	60.7357	1.54829	0.130668	1.5213	0.111227
101437_at	Dhx32	DEAH (Asp-Glu-Ala-His) box polypeptide 32	-1.02429	60.7357	-1.22051	0.308961	-1.25015	0.0469889
101471_at	Phrf1	PHD and ring finger domains 1	1.16312	6.16911	-1.41638	0.130668	-1.21775	0.224685
101476_at	Plekha1	pleckstrin homology domain containing, family A (phosphoinositide binding specific) member 1	1.20958	2.9847	-1.39859	0.0451547	-1.15626	1.13219
101488_at	Slco2b1	solute carrier organic anion transporter family, member 2b1	-1.74621	0.192905	1.15206	14.3309	-1.51572	0.0148586
101488143_at	Hbb-bt	hemoglobin, beta adult t chain	-6.85451	0	-1.75239	0.0451547	-12.0118	0
101489_at	Ric8a	RIC8 guanine nucleotide exchange factor A	-1.09857	42.041	1.1305	14.3309	1.02907	27.3308
101490_at	Inpp5f	inositol polyphosphate-5-phosphatase F	-1.48808	0.748121	-1.31118	2.18295	-1.95114	0
101497_at	Plekhg2	pleckstrin homology domain containing, family G (with RhoGef domain) member 2	-1.07776	54.2028	-1.17032	5.99507	-1.26132	0.0469889
101502_at	Hsd3b7	hydroxy-delta-5-steroid dehydrogenase, 3 beta- and steroid delta-isomerase 7	-1.26694	6.16911	1.42328	0.308961	1.1234	7.52666
101513_at	Mob2	MOB kinase activator 2	-1.14963	25.0856	-1.32521	0.803127	-1.52351	0.0469889
101521_at	AI314278	expressed sequence AI314278	-1.14785	25.0856	2.11768	0	1.84492	0
101533_at	Klk9	kallikrein related-peptidase 9	3.48473	0	-3.6139	0	-1.03707	31.9769
101540_at	Prkd2	protein kinase D2	-1.71458	0.0881706	1.21058	2.18295	-1.41632	0
101543_at	Wtip	WT1-interacting protein	1.05868	42.041	1.04936	26.6761	1.11094	7.52666
101544_at	Zfp575	zinc finger protein 575	1.24411	12.3562	-1.19292	5.99507	1.04291	16.9924
101565_at	Ccp110	centriolar coiled coil protein 110	1.09209	25.0856	-1.58286	0.0296712	-1.44938	0
101568_at	Vrk3	vaccinia related kinase 3	-1.14539	12.3562	1.20604	2.18295	1.05296	16.9924
101592_at	Efl1	elongation factor like GPTase 1	1.18431	6.16911	-1.45284	0.308961	-1.22674	7.52666
101602_at	AI467606	expressed sequence AI467606	-1.48714	0.104308	1.11325	5.99507	-1.33586	0.0469889
101604_at	E430018J23Rik	RIKEN cDNA E430018J23 gene	1.07736	42.041	1.11598	14.3309	1.20231	2.97913
101612_at	Grwd1	glutamate-rich WD repeat containing 1	1.52553	0.301356	-1.31154	0.130668	1.16316	2.97913
101613_at	Nlrp6	NLR family, pyrin domain containing 6	1.08189	42.041	-1.08855	26.6761	-1.00616	36.5645
101631_at	Pwwp2b	PWWP domain containing 2B	-1.15557	25.0856	1.23615	2.18295	1.06973	16.9924
101685_at	Spty2d1	SPT2, Suppressor of Ty, domain containing 1 (S. cerevisiae)	-1.21468	2.9847	1.13251	5.99507	-1.07255	16.9924
101694_at	Mir9-3hg	Mir9-3 host gene	-1.06712	54.2028	1.03395	35.7106	-1.03208	31.9769
101700_at	Trim68	tripartite motif-containing 68	-1.33676	1.50007	-1.20867	5.99507	-1.6157	0.224685
101706_at	Numa1	nuclear mitotic apparatus protein 1	-1.38833	0.748121	1.07487	14.3309	-1.29163	0.224685
101739_at	Psip1	PC4 and SFRS1 interacting protein 1	1.06617	42.041	-1.69721	0.130668	-1.59187	0.224685
101744_at	Acp7	acid phosphatase 7, tartrate resistant	1.08219	25.0856	1.00396	42.8252	1.08648	7.52666
101772_at	Ano1	anoctamin 1, calcium activated chloride channel	1.04605	42.041	-1.03284	35.7106	1.0128	31.9769
101786_at	A730082K24Rik	RIKEN cDNA A730082K24 gene	-1.01467	60.7357	1.15243	5.99507	1.13577	7.52666
101809_at	Spred3	sprouty-related, EVH1 domain containing 3	1.17778	12.3562	-1.21452	5.99507	-1.0312	36.5645
101831_at	Faap24	Fanconi anemia core complex associated protein 24	1.39247	0.192905	-1.4163	0.130668	-1.01711	36.5645
101835_at	AW146154	expressed sequence AW146154	1.09846	42.041	-1.34335	0.803127	-1.22295	2.97913
101861_at	Ints4	integrator complex subunit 4	1.05502	42.041	-1.2186	0.803127	-1.15505	2.97913
101867_at	Rrp8	ribosomal RNA processing 8, methyltransferase, homolog (yeast)	1.17819	12.3562	-1.05858	35.7106	1.11299	7.52666
101869_at	Unc45a	unc-45 myosin chaperone A	1.11531	25.0856	-1.23712	2.18295	-1.10922	16.9924
101883_at	Igflr1	IGF-like family receptor 1	-1.13304	42.041	1.03186	35.7106	-1.09806	27.3308
101943_at	Sf3b3	splicing factor 3b, subunit 3	1.45504	0.301356	-1.28099	0.308961	1.13587	2.97913
101966_at	D8Ertd738e	DNA segment, Chr 8, ERATO Doi 738, expressed	-1.03701	60.0813	-1.14031	2.18295	-1.18252	2.97913
101985_at	Usb1	U6 snRNA biogenesis 1	1.16887	12.3562	1.01022	41.0315	1.18082	1.13219
101994_at	Champ1	chromosome alignment maintaining phosphoprotein 1	1.30967	1.50007	-1.51297	0.130668	-1.15524	7.52666
102022_at	Ces2a	carboxylesterase 2A	-1.14862	25.0856	1.60429	0.130668	1.39672	1.13219
102032_at	Smim19	small integral membrane protein 19	-1.12888	25.0856	-1.15545	14.3309	-1.30436	1.13219
102058_at	Exoc8	exocyst complex component 8	-1.44853	2.9847	1.48048	0.803127	1.02205	31.9769
102060_at	Gadd45gip1	growth arrest and DNA-damage-inducible, gamma interacting protein 1	1.27227	2.9847	-1.27362	0.803127	-1.00106	36.5645
102075_at	Plekhg4	pleckstrin homology domain containing, family G (with RhoGef domain) member 4	1.0734	42.041	-1.09798	26.6761	-1.0229	36.5645
102093_at	Phkb	phosphorylase kinase beta	-1.52339	0.192905	-1.27943	0.308961	-1.94907	0
102098_at	Arhgef18	rho/rac guanine nucleotide exchange factor (GEF) 18	-3.03703	0	1.1377	5.99507	-2.66944	0
102103_at	Mtus1	mitochondrial tumor suppressor 1	-3.57116	0	4.213	0	1.17973	0.482549
102115_at	Dohh	deoxyhypusine hydroxylase/monooxygenase	1.4936	0.748121	-1.34114	2.18295	1.11368	7.52666
102122_at	Fam192a	family with sequence similarity 192, member A	1.02424	54.2028	-1.21559	0.308961	-1.18682	0.482549
102124_at	Enkd1	enkurin domain containing 1	1.15881	12.3562	-1.19247	5.99507	-1.02905	36.071
102132_at	E230013L22Rik	RIKEN cDNA E230013L22 gene	1.25627	6.16911	-1.12968	14.3309	1.11205	7.52666
102141_at	Snx25	sorting nexin 25	-1.01667	60.7357	-1.21402	0.803127	-1.23426	0.482549
102162_at	Taf5l	TATA-box binding protein associated factor 5 like	1.25078	2.9847	-1.32266	0.803127	-1.05747	31.9769
102182_at	Prmt9	protein arginine methyltransferase 9	-1.12212	25.0856	-1.38855	0.130668	-1.55812	0
102193_at	Zdhhc7	zinc finger, DHHC domain containing 7	-1.13358	42.041	1.29932	2.18295	1.14621	2.97913
102209_at	Snapc2	small nuclear RNA activating complex, polypeptide 2	1.02003	54.2028	-1.19426	5.99507	-1.1708	7.52666
102216272_at	Ak6	adenylate kinase 6	1.92535	0	-1.69674	0.0296712	1.13474	7.52666
102238518_at	LOC102238518	polymerase (RNA) II (DNA directed) polypeptide K pseudogene	-1.01311	60.7357	-1.20075	5.99507	-1.21649	2.97913
102238526_at	LOC102238526	polymerase (RNA) II (DNA directed) polypeptide K pseudogene	1.28611	6.16911	-1.09332	26.6761	1.17633	7.52666
102247_at	Gpat4	glycerol-3-phosphate acyltransferase 4	1.35734	0.748121	-1.28347	0.308961	1.05756	16.9924
102278_at	Cpne7	copine VII	-1.00366	60.7357	-1.03558	35.7106	-1.03937	27.3308
102294_at	Cyp4v3	cytochrome P450, family 4, subfamily v, polypeptide 3	1.14239	12.3562	-2.12438	0	-1.8596	0
102323_at	Dcun1d2	DCN1, defective in cullin neddylation 1, domain containing 2 (S. cerevisiae)	1.1061	25.0856	-1.07615	35.7106	1.02783	31.9769
102334_at	Ankrd10	ankyrin repeat domain 10	1.05788	42.041	-1.34447	0.803127	-1.27091	1.13219
102339_at	Cog4	component of oligomeric golgi complex 4	-1.12133	25.0856	-1.21285	0.308961	-1.36	0.0469889
102371_at	Myzap	myocardial zonula adherens protein	-1.19268	6.16911	-1.76256	0.0201689	-2.10217	0
102402_at	AA414992	expressed sequence AA414992	1.04884	42.041	1.16953	5.99507	1.22665	2.97913
102414_at	Clk3	CDC-like kinase 3	-1.22906	2.9847	1.06036	26.6761	-1.15909	0.482549
102423_at	Hinfp	histone H4 transcription factor	1.00123	54.2028	-1.27848	2.18295	-1.27691	0.482549
102436_at	Lars2	leucyl-tRNA synthetase, mitochondrial	1.21457	6.16911	-1.40623	0.0451547	-1.1578	1.13219
102442_at	Dennd4a	DENN/MADD domain containing 4A	1.01563	54.2028	-1.08179	14.3309	-1.06514	16.9924
102443350_at	Xndc1	Xrcc1 N-terminal domain containing 1	1.02199	54.2028	-1.62447	2.18295	-1.58951	2.97913
102448_at	Xylb	xylulokinase homolog (H. influenzae)	1.33555	1.50007	-1.22101	2.18295	1.09381	2.97913
102462_at	Imp3	IMP3, U3 small nucleolar ribonucleoprotein	1.27203	1.50007	-1.83377	0	-1.44161	0
102465224_at	Mir378d	microRNA 378d	-1.0668	57.704	1.53069	0.308961	1.43485	0.482549
102465258_at	Mir6516	microRNA 6516	1.16205	25.0856	-1.46161	0.803127	-1.25779	16.9924
102465895_at	Gm24148	predicted gene, 24148	1.46123	0.301356	-1.53718	0.130668	-1.05198	31.9769
102502_at	Pls1	plastin 1 (I-isoform)	-1.08319	54.2028	1.47517	0.130668	1.36187	0.224685
102545_at	Cmtm7	CKLF-like MARVEL transmembrane domain containing 7	-1.16194	6.16911	-1.32511	0.0451547	-1.5397	0
102566_at	Ano10	anoctamin 10	-1.96996	0	1.68944	0.0201689	-1.16605	0.224685
102570_at	Slc22a13	solute carrier family 22 (organic cation transporter), member 13	-1.2264	12.3562	1.50828	0.130668	1.22984	2.97913
102577428_at	Gm44501	predicted readthrough transcript, 44501	-1.17216	42.041	1.19408	14.3309	1.0187	31.9769
102580_at	Alg9	asparagine-linked glycosylation 9 (alpha 1,2 mannosyltransferase)	1.6086	0.192905	-1.00162	43.2839	1.606	0.0469889
102595_at	Plekho2	pleckstrin homology domain containing, family O member 2	-1.20048	6.16911	1.28678	0.803127	1.07188	7.52666
102607_at	Snx19	sorting nexin 19	-1.06454	54.2028	-1.38036	0.0451547	-1.46944	0.0148586
102614_at	Rpp25	ribonuclease P/MRP 25 subunit	-1.08056	54.2028	1.27892	0.803127	1.18357	0.482549
102626_at	Mapkapk3	mitogen-activated protein kinase-activated protein kinase 3	-1.06096	54.2028	1.17355	2.18295	1.10612	2.97913
102631513_at	Gm11998	predicted gene 11998	2.0108	0.0546658	-2.58156	0	-1.28385	0.482549
102631518_at	Gm38438	predicted gene, 38438	1.07907	42.041	-1.03938	35.7106	1.03819	16.9924
102631543_at	Gm15651	predicted gene 15651	-1.01992	60.7357	1.17003	14.3309	1.14718	7.52666
102631572_at	Gm11685	predicted gene 11685	-1.16987	25.0856	-1.02131	41.0315	-1.19479	7.52666
102631579_at	Gm26752	predicted gene, 26752	1.22895	12.3562	1.2216	2.18295	1.50128	0.482549
102631588_at	Gm16068	predicted gene 16068	-1.30831	12.3562	1.03791	35.7106	-1.26052	2.97913
102631592_at	Gm15230	predicted gene 15230	-1.09325	54.2028	1.10715	14.3309	1.01271	31.9769
102631616_at	Gm14642	predicted gene 14642	1.00007	54.2028	1.05346	26.6761	1.05353	27.3308
102631647_at	Gm16041	predicted gene 16041	-1.00956	60.7357	1.13121	14.3309	1.1205	7.52666
102631682_at	Gm11683	predicted gene 11683	1.08205	42.041	1.33748	5.99507	1.44722	1.13219
102631730_at	4930512M02Rik	RIKEN cDNA 4930512M02 gene	1.0589	42.041	1.1906	5.99507	1.26073	2.97913
102631757_at	LOC102631757	uncharacterized LOC102631757	-1.11547	42.041	1.50422	0.308961	1.3485	0.482549
102631780_at	LOC102631780	uncharacterized LOC102631780	-1.13465	42.041	-1.24581	5.99507	-1.41356	1.13219
102631784_at	Gm13267	predicted gene 13267	1.07532	25.0856	1.00464	42.8252	1.08031	7.52666
102631805_at	LOC102631805	serine/threonine-protein kinase par-1-like	-1.10376	54.2028	1.33853	2.18295	1.21269	2.97913
102631821_at	Gm11682	predicted gene 11682	1.03389	54.2028	1.01581	41.0315	1.05023	16.9924
102631833_at	Gm14040	predicted gene 14040	1.03591	54.2028	-1.15046	14.3309	-1.11058	27.3308
102631840_at	Gm11999	predicted gene 11999	1.10827	25.0856	1.0054	42.8252	1.11426	2.97913
102631841_at	Gm26629	predicted gene, 26629	1.04047	54.2028	1	42.8252	1.04047	27.3308
102631855_at	Gm30082	predicted gene, 30082	-1.11745	42.041	1.49844	0.308961	1.34094	0.0469889
102631868_at	Gm13912	predicted gene 13912	1.06805	42.041	-1.05705	26.6761	1.01041	31.9769
102631889_at	Gm16638	predicted gene, 16638	1.23853	6.16911	-1.17114	14.3309	1.05754	27.3308
102631901_at	Gm14041	predicted gene 14041	-1.13009	42.041	1.14363	14.3309	1.01198	31.9769
102631912_at	LOC102631912	uncharacterized LOC102631912	-1.16654	12.3562	-1.25216	2.18295	-1.46069	0.482549
102631922_at	Gm30132	predicted gene, 30132	-1.26539	6.16911	1.74487	0.0296712	1.37892	1.13219
102631924_at	LOC102631924	60S ribosomal protein L17 pseudogene	1.23432	25.0856	-1.64684	0.308961	-1.33421	0.482549
102631939_at	Gm12977	predicted gene 12977	-1.15055	25.0856	1.01284	41.0315	-1.13597	16.9924
102631940_at	LOC102631940	60S acidic ribosomal protein P1 pseudogene	1.03436	54.2028	1.02018	42.8252	1.05524	27.3308
102631947_at	Gm14936	predicted gene 14936	1.19245	2.9847	1.14443	14.3309	1.36467	0.224685
102631961_at	Gm26634	predicted gene, 26634	1.00733	54.2028	1.13081	14.3309	1.13909	2.97913
102631973_at	Gm30168	predicted gene, 30168	1.23341	6.16911	-1.19526	5.99507	1.03192	27.3308
102631993_at	LOC102631993	uncharacterized LOC102631993	-1.06376	54.2028	-1.10116	5.99507	-1.17137	2.97913
102631997_at	Gm12589	predicted gene 12589	1.07132	42.041	1.23189	2.18295	1.31976	0.224685
102632_at	Acad11	acyl-Coenzyme A dehydrogenase family, member 11	-1.31238	2.9847	-1.10936	14.3309	-1.45591	0.111227
102632019_at	Gm26777	predicted gene, 26777	-1.05968	57.704	1.19756	5.99507	1.13011	7.52666
102632031_at	LOC102632031	uncharacterized LOC102632031	-1.08848	42.041	1.05445	35.7106	-1.03227	36.071
102632070_at	Gm20465	predicted gene 20465	-1.05439	57.704	1.03749	35.7106	-1.01629	36.5645
102632078_at	Gm12290	predicted gene 12290	1.22994	6.16911	1.09077	14.3309	1.34159	1.13219
102632086_at	Gm13383	predicted gene 13383	2.41834	0.0881706	-1.31545	0.803127	1.83841	0.0469889
102632087_at	Gm13373	predicted gene 13373	1.01505	54.2028	1.17479	2.18295	1.19247	1.13219
102632102_at	LOC102632102	zinc finger protein 120-like	-1.02951	60.7357	-1.27977	2.18295	-1.31754	0.482549
102632113_at	LOC102632113	uncharacterized LOC102632113	-1.16533	57.704	1.82348	2.18295	1.56478	2.97913
102632119_at	Gm16311	predicted gene 16311	1.09328	25.0856	-1.0786	26.6761	1.01361	31.9769
102632124_at	Gm26901	predicted gene, 26901	-1.03183	60.7357	1.20212	0.803127	1.16504	16.9924
102632144_at	Gm16246	predicted gene 16246	1.18173	12.3562	-1.2435	2.18295	-1.05227	31.9769
102632155_at	Gm24105	predicted gene, 24105	1.10209	25.0856	-1.6174	0.0451547	-1.46757	0.0469889
102632165_at	Gm13388	predicted gene 13388	-1.25831	2.9847	1.40461	0.130668	1.11627	7.52666
102632200_at	Gm30340	predicted gene, 30340	-1.05341	60.7357	2.30269	0.130668	2.18594	0.0469889
102632222_at	Gm17182	predicted gene 17182	1.08089	25.0856	1.06048	26.6761	1.14626	2.97913
102632231_at	LOC102632231	uncharacterized LOC102632231	1.35001	1.50007	-1.47768	0.0451547	-1.09457	16.9924
102632240_at	Gm15555	predicted gene 15555	1.02401	54.2028	1.0088	42.8252	1.03302	27.3308
102632246_at	Gm12354	predicted gene 12354	-1.09605	54.2028	1.25678	5.99507	1.14664	7.52666
102632251_at	Gm16143	predicted gene 16143	-1.07007	54.2028	1.32533	0.803127	1.23855	2.97913
102632256_at	LOC102632256	doublesex- and mab-3-related transcription factor C1-like	-1.13263	42.041	1.90498	0.803127	1.68191	2.97913
102632291_at	LOC102632291	TAR DNA-binding protein 43 pseudogene	1.07334	42.041	1.24148	5.99507	1.33254	1.13219
102632302_at	LOC102632302	uncharacterized LOC102632302	1.15294	25.0856	1.03514	35.7106	1.19345	7.52666
102632357_at	LOC102632357	uncharacterized LOC102632357	-1.35147	2.9847	-1.35989	2.18295	-1.83786	0.111227
102632360_at	Gm14616	predicted gene 14616	-1.01432	60.7357	1.17855	5.99507	1.16192	7.52666
102632388_at	Gm38444	predicted gene, 38444	-1.07409	57.704	-1.08965	35.7106	-1.17038	27.3308
102632394_at	Gm26910	predicted gene, 26910	-1.11661	42.041	-1.02369	41.0315	-1.14306	1.13219
102632404_at	Gm15396	predicted gene 15396	-1.05882	57.704	1.24151	5.99507	1.17255	2.97913
102632420_at	Gm16118	predicted gene 16118	-1.01724	60.7357	1.09037	26.6761	1.0719	27.3308
102632425_at	Gm30500	predicted gene, 30500	-1.25791	25.0856	1.80646	0.803127	1.43608	1.13219
102632427_at	Gm30502	predicted gene, 30502	1.40613	2.9847	-1.28779	5.99507	1.09189	16.9924
102632438_at	Gm13709	predicted gene 13709	-1.21183	12.3562	1.17618	14.3309	-1.03031	36.071
102632463_at	LOC102632463	uncharacterized LOC102632463	1.03398	54.2028	1.07549	14.3309	1.11203	7.52666
102632465_at	LOC102632465	uncharacterized LOC102632465	-1.2933	2.9847	1.31532	0.803127	1.01702	31.9769
102632476_at	LOC102632476	40S ribosomal protein S21 pseudogene	1.14775	12.3562	-1.08563	14.3309	1.05721	16.9924
102632484_at	Gm26691	predicted gene, 26691	-1.07226	60.0813	1.05582	35.7106	-1.01557	36.5645
102632514_at	Gm13479	predicted gene 13479	-1.28693	6.16911	1.42976	0.803127	1.11099	16.9924
102632516_at	Gm30571	predicted gene, 30571	-1.13506	42.041	1.45843	0.308961	1.28489	0.224685
102632538_at	LOC102632538	uncharacterized LOC102632538	1.0505	54.2028	1.2853	5.99507	1.3502	2.97913
102632568_at	Gm16116	predicted gene 16116	1.02826	54.2028	1.27091	0.803127	1.30683	1.13219
102632590_at	Gm26851	predicted gene, 26851	1.17924	6.16911	-1.07198	35.7106	1.10006	16.9924
102632593_at	Gm30627	predicted gene, 30627	1.03001	54.2028	-1.10288	14.3309	-1.07074	31.9769
102632602_at	Gm16553	predicted gene 16553	-2.17704	0	1.24117	2.18295	-1.75401	0
102632611_at	Gm11211	predicted gene 11211	-1.09872	54.2028	1.93245	0.0296712	1.75882	0.224685
102632613_at	Gm14144	predicted gene 14144	1.25748	6.16911	1.51251	0.803127	1.90195	0.224685
102632635_at	Gm26843	predicted gene, 26843	1.52319	1.50007	-1.07358	35.7106	1.4188	0.482549
102632654_at	Gm16555	predicted gene 16555	1.02513	54.2028	1.23275	2.18295	1.26373	1.13219
102632657_at	Gm12678	predicted gene 12678	1.02275	54.2028	1.31636	2.18295	1.34631	1.13219
102632661_at	Gm38447	predicted gene, 38447	1.25559	6.16911	-1.08421	35.7106	1.15807	7.52666
102632665_at	Gm14344	predicted gene 14344	1.0256	54.2028	-1.02665	42.8252	-1.00103	36.5645
102632669_at	Gm16206	predicted gene 16206	1.02646	54.2028	1.15406	5.99507	1.18459	2.97913
102632673_at	Gm15245	predicted gene 15245	-1.02523	60.7357	1.05596	26.6761	1.02997	27.3308
102632682_at	Gm38448	predicted gene, 38448	-1.69715	6.16911	3.74822	0.0451547	2.20853	0
102632686_at	Gm16351	predicted gene 16351	-1.0469	57.704	1.09949	14.3309	1.05023	16.9924
102632708_at	Gm15523	predicted gene 15523	1.32748	2.9847	-1.17747	2.18295	1.1274	7.52666
102632722_at	Gm30718	predicted gene, 30718	1.239	6.16911	1.2586	2.18295	1.55941	0
102632739_at	LOC102632739	dolichyl-diphosphooligosaccharide--protein glycosyltransferase subunit 4-like	1.14958	12.3562	-1.28144	0.308961	-1.1147	7.52666
102632741_at	Gm14342	predicted gene 14342	1.08958	42.041	2.07863	0.0296712	2.26484	0
102632778_at	LOC102632778	uncharacterized LOC102632778	-1.05576	60.7357	-1.1802	5.99507	-1.246	16.9924
102632786_at	Gm20492	predicted gene 20492	-1.48545	1.50007	1.01867	41.0315	-1.45822	1.13219
102632809_at	Gm11205	predicted gene 11205	1.20615	12.3562	2.58315	0.0201689	3.11567	0
102632813_at	Gm15486	predicted gene 15486	1.02885	54.2028	1.22605	5.99507	1.26143	2.97913
102632820_at	Gm13707	predicted gene 13707	-1.04839	57.704	1.20094	2.18295	1.14551	1.13219
102632821_at	LOC102632821	uncharacterized LOC102632821	1.07473	42.041	1.12691	14.3309	1.21113	2.97913
102632837_at	Rnf212b	ring finger protein 212B	-1.01669	60.7357	1.07735	26.6761	1.05967	16.9924
102632845_at	Gm30810	predicted gene, 30810	2.08838	0.301356	-1.50481	2.18295	1.38781	7.52666
102632854_at	Gm17115	predicted gene 17115	-1.08376	54.2028	1.81026	0.0451547	1.67035	0.111227
102632893_at	Gm14285	predicted gene 14285	1.05133	42.041	-1.07466	26.6761	-1.02219	34.5868
102632898_at	Gm16230	predicted gene 16230	-1.08655	42.041	1.39266	0.803127	1.28172	2.97913
102632901_at	LOC102632901	uncharacterized LOC102632901	-1.0395	60.0813	1.2635	0.803127	1.2155	2.97913
102632928_at	Gm17215	predicted gene 17215	1.05903	42.041	-1.03907	35.7106	1.01921	27.3308
102632931_at	LOC102632931	V-type proton ATPase subunit F pseudogene	1.99936	0.104308	1.04935	35.7106	2.09803	0.0469889
102632938_at	Gm15939	predicted gene 15939	-1.04163	60.0813	1.16144	5.99507	1.11502	7.52666
102632940_at	Gm11482	predicted gene 11482	-1.08067	54.2028	1.26892	2.18295	1.1742	7.52666
102632947_at	Gm15731	predicted gene 15731	-1.08247	42.041	1.38962	0.308961	1.28375	0.482549
102632986_at	Gm16035	predicted gene 16035	-1.11607	42.041	1.12417	5.99507	1.00726	31.9769
102632994_at	Gm11592	predicted gene 11592	1.05853	42.041	1.38151	0.803127	1.46237	0.224685
102633000_at	2310043M15Rik	RIKEN cDNA 2310043M15 gene	1.11449	25.0856	1.07791	26.6761	1.20132	2.97913
102633032_at	1700064H15Rik	RIKEN cDNA 1700064H15 gene	-1.00934	60.7357	1.02657	41.0315	1.01707	31.9769
102633044_at	Gm14808	predicted gene 14808	-1.02511	60.7357	1.11481	14.3309	1.0875	7.52666
102633050_at	LOC102633050	cytochrome b-c1 complex subunit 9 pseudogene	1.18111	6.16911	-1.30347	0.308961	-1.1036	7.52666
102633065_at	Gm13470	predicted gene 13470	-1.0427	57.704	1.12975	14.3309	1.08348	16.9924
102633071_at	Gm14167	predicted gene 14167	1.0523	42.041	-1.08951	14.3309	-1.03536	34.5868
102633076_at	LOC102633076	60S ribosomal protein L23a pseudogene	1.14174	25.0856	1.25903	5.99507	1.43749	1.13219
102633081_at	Gm12610	predicted gene 12610	-1.21798	2.9847	1.28872	0.308961	1.05808	16.9924
102633109_at	Gm11884	predicted gene 11884	1.01751	54.2028	-1.20307	5.99507	-1.18236	7.52666
102633151_at	LOC102633151	uncharacterized LOC102633151	-1.23638	25.0856	1.06908	35.7106	-1.15648	31.9769
102633165_at	Gm38451	predicted gene, 38451	1.0956	25.0856	-1.00197	43.2839	1.09345	7.52666
102633214_at	Gm12925	predicted gene 12925	-1.02026	60.7357	1.2883	0.803127	1.26272	1.13219
102633236_at	Gm13481	predicted gene 13481	-1.03708	60.7357	-1.04176	35.7106	-1.08038	31.9769
102633244_at	Gm26710	predicted gene, 26710	1.11069	42.041	-1.0145	42.8252	1.09482	16.9924
102633245_at	Gm15723	predicted gene 15723	1.03691	54.2028	1.65427	0.803127	1.71533	0.482549
102633259_at	Gm16249	predicted gene 16249	-1.0602	54.2028	1.35728	0.130668	1.28021	0.0469889
102633312_at	1700001J04Rik	RIKEN cDNA 1700001J04 gene	-1.05997	57.704	1.08019	26.6761	1.01908	31.9769
102633315_at	Gm16159	predicted gene 16159	-1.00964	60.7357	1.32258	0.803127	1.30994	0.224685
102633321_at	4930448E22Rik	RIKEN cDNA 4930448E22 gene	-1.01609	60.7357	1.12607	14.3309	1.10824	7.52666
102633324_at	Gm16142	predicted gene 16142	-1.06688	57.704	1.27382	2.18295	1.19396	2.97913
102633345_at	LOC102633345	uncharacterized LOC102633345	1.0561	42.041	1.91435	0	2.02174	0
102633347_at	Gm26708	predicted gene, 26708	1.0591	42.041	1.17901	5.99507	1.24869	0.482549
102633371_at	Gm14902	predicted gene 14902	1.06593	42.041	-1.0674	26.6761	-1.00138	36.5645
102633407_at	Gm26847	predicted gene, 26847	-1.0159	60.7357	-1.02074	41.0315	-1.03697	34.5868
102633420_at	Gm12223	predicted gene 12223	-1.07879	54.2028	1.65923	0.130668	1.53805	0.224685
102633432_at	Gm31262	predicted gene, 31262	-1.22495	12.3562	1.55649	0.130668	1.27066	0.482549
102633435_at	Gm26535	predicted gene, 26535	1.25787	12.3562	2.81595	0	3.54211	0
102633436_at	Gm11217	predicted gene 11217	-1.09134	42.041	1.04768	26.6761	-1.04167	34.5868
102633437_at	Gm31264	predicted gene, 31264	1.06883	42.041	1.44813	0.308961	1.54781	0.0148586
102633438_at	Gm13974	predicted gene 13974	1.08324	42.041	1.22164	2.18295	1.32334	0.482549
102633439_at	Gm14154	predicted gene 14154	-1.04668	57.704	1.17553	5.99507	1.12311	2.97913
102633452_at	Gm38453	predicted gene, 38453	1.26422	25.0856	1.43987	0.803127	1.82031	1.13219
102633458_at	Gm11100	predicted gene 11100	-1.24355	12.3562	1.04893	35.7106	-1.18554	16.9924
102633478_at	Gm16090	predicted gene 16090	1.2112	6.16911	1.30132	0.803127	1.57617	0
102633516_at	Peak1os	pseudopodium-enriched atypical kinase 1, opposite strand	1.08559	42.041	-1.33086	5.99507	-1.22593	7.52666
102633540_at	Myhas	myosin heavy chain gene antisense RNA	1.0405	54.2028	1.3453	2.18295	1.39978	0.482549
102633555_at	Gm14051	predicted gene 14051	1.20091	12.3562	1.97217	0.0451547	2.3684	0.0148586
102633576_at	4930412F09Rik	RIKEN cDNA 4930412F09 gene	1.00311	54.2028	-1.1202	26.6761	-1.11673	16.9924
102633593_at	AA387200	expressed sequence AA387200	-1.00219	60.7357	1.07034	26.6761	1.068	7.52666
102633600_at	Gm26633	predicted gene, 26633	-1.0659	57.704	1.11207	14.3309	1.04331	27.3308
102633627_at	LOC102633627	tropomyosin alpha-4 chain pseudogene	1.08274	42.041	1.20642	2.18295	1.30624	0.482549
102633634_at	Gm26876	predicted gene, 26876	-1.25947	6.16911	1.24108	5.99507	-1.01481	36.5645
102633651_at	Gm14532	predicted gene 14532	1.06782	42.041	-1.18076	0.803127	-1.10577	7.52666
102633666_at	LOC102633666	uncharacterized LOC102633666	1.00745	54.2028	-1.63232	0.0201689	-1.62025	0
102633673_at	Etaa1os	Ewing tumor-associated antigen 1, opposite strand	1.14982	12.3562	-1.14891	5.99507	1.00079	31.9769
102633679_at	Gm31445	predicted gene, 31445	1.12437	25.0856	1.78774	0.130668	2.01008	0.0469889
102633692_at	Gm15395	predicted gene 15395	1.05641	42.041	-1.23281	5.99507	-1.16699	2.97913
102633724_at	1700047F07Rik	RIKEN cDNA 1700047F07 gene	-1.26229	2.9847	1.17578	5.99507	-1.07357	27.3308
102633732_at	Gm31486	predicted gene, 31486	-1.12312	57.704	1.09166	26.6761	-1.02881	36.5645
102633750_at	Gm10130	predicted gene 10130	1.22336	25.0856	-1.4986	0.803127	-1.22498	7.52666
102633782_at	Gm31526	predicted gene, 31526	1.03877	54.2028	-1.35132	0.308961	-1.30088	0.482549
102633794_at	LOC102633794	uncharacterized LOC102633794	-1.08366	54.2028	1.13014	14.3309	1.04289	16.9924
102633800_at	LOC102633800	60S ribosomal protein L23a pseudogene	1.10477	54.2028	2.25515	0.308961	2.49143	1.13219
102633805_at	Gm26688	predicted gene, 26688	1.15462	12.3562	1.26127	2.18295	1.45629	0.482549
102633809_at	LOC102633809	guanine nucleotide-binding protein G(I)/G(S)/G(O) subunit gamma-5 pseudogene	-1.09397	42.041	1.07199	26.6761	-1.0205	36.5645
102633824_at	Gm13261	predicted gene 13261	-1.0081	60.7357	1.06686	26.6761	1.05829	16.9924
102633833_at	Gm38455	predicted gene, 38455	1.05906	54.2028	1.6354	2.18295	1.73198	0.224685
102633872_at	Gm26544	predicted gene, 26544	1.01856	54.2028	1.12997	5.99507	1.15094	1.13219
102633880_at	LOC102633880	uncharacterized LOC102633880	-1.76935	1.50007	1.23725	14.3309	-1.43006	1.13219
102633911_at	Gm12022	predicted gene 12022	-1.19309	12.3562	1.18103	5.99507	-1.01021	36.5645
102633918_at	Gm12916	predicted gene 12916	1.03982	42.041	-1.17052	2.18295	-1.12569	7.52666
102633925_at	Gm13782	predicted gene 13782	-1.07549	54.2028	1.23498	2.18295	1.1483	7.52666
102633928_at	Sox5os4	SRY (sex determining region Y)-box 5, opposite strand 4	1.03571	54.2028	1.09371	26.6761	1.13277	16.9924
102633930_at	LOC102633930	uncharacterized LOC102633930	-1.22067	12.3562	1.10882	14.3309	-1.10088	27.3308
102633939_at	Gm15518	predicted gene 15518	2.09241	0.0881706	-2.60525	0	-1.2451	1.13219
102633942_at	Gm14487	predicted gene 14487	-1.23351	12.3562	1.933	0.0296712	1.56707	0
102633950_at	Gm26579	predicted gene, 26579	1.09879	25.0856	-1.02437	41.0315	1.07264	7.52666
102633975_at	Gm12911	predicted gene 12911	1.05441	42.041	-1.04187	35.7106	1.01204	31.9769
102633993_at	Gm31683	predicted gene, 31683	-1.70446	0.748121	3.8512	0	2.25948	0
102634011_at	Gm26868	predicted gene, 26868	1.03711	54.2028	1.07383	26.6761	1.11368	16.9924
102634021_at	Gm13001	predicted gene 13001	1.14967	6.16911	1.09679	26.6761	1.26095	2.97913
102634036_at	Gm13847	predicted gene 13847	-1.315	2.9847	1.39567	0.308961	1.06134	16.9924
102634042_at	LOC102634042	uncharacterized LOC102634042	1.07514	42.041	1.20142	5.99507	1.29169	2.97913
102634058_at	LOC102634058	uncharacterized LOC102634058	1.00017	54.2028	1.36226	0.308961	1.3625	0.482549
102634060_at	Gm19708	predicted gene, 19708	1.0443	42.041	-1.00085	43.2839	1.04342	16.9924
102634063_at	Gm14950	predicted gene 14950	1.03096	54.2028	-1.13631	5.99507	-1.10218	7.52666
102634065_at	LOC102634065	protein transport protein Sec61 subunit gamma pseudogene	1.19549	12.3562	1.46406	0.308961	1.75027	0.0469889
102634068_at	Gm12907	predicted gene 12907	1.11737	25.0856	-1.00482	43.2839	1.11201	16.9924
102634072_at	Gm38457	predicted gene, 38457	1.12018	25.0856	-1.21195	2.18295	-1.08192	7.52666
102634079_at	Slc36a3os	solute carrier family 36 (proton/amino acid symporter), member 3, opposite strand	1.19753	12.3562	-1.17829	5.99507	1.01633	31.9769
102634096_at	Gm11476	predicted gene 11476	-1.2222	12.3562	1.66403	0.130668	1.36151	1.13219
102634100_at	Gm38459	predicted gene, 38459	1.09513	42.041	1.00332	42.8252	1.09877	27.3308
102634129_at	Gm16365	predicted gene 16365	-1.06612	54.2028	1.16623	2.18295	1.09391	7.52666
102634132_at	LOC102634132	uncharacterized LOC102634132	1.11318	42.041	-1.20454	14.3309	-1.08207	27.3308
102634135_at	LOC102634135	60S acidic ribosomal protein P1 pseudogene	1.24392	12.3562	1.05684	35.7106	1.31463	7.52666
102634155_at	Gm17025	predicted gene 17025	-1.2259	6.16911	1.06188	26.6761	-1.15446	7.52666
102634168_at	Gm38460	predicted gene, 38460	-1.08863	57.704	2.88672	0.0296712	2.65171	0.0469889
102634169_at	Gm11917	predicted gene 11917	-1.0363	60.0813	1.11229	14.3309	1.07333	7.52666
102634174_at	Gm16104	predicted gene 16104	-1.3191	6.16911	1.04653	35.7106	-1.26046	2.97913
102634183_at	Gm31828	predicted gene, 31828	1.11295	25.0856	-1.14924	5.99507	-1.0326	34.5868
102634205_at	Gm13264	predicted gene 13264	1.03942	54.2028	1.2403	2.18295	1.28919	1.13219
102634211_at	Gm13990	predicted gene 13990	-1.14314	25.0856	1.3898	0.803127	1.21578	2.97913
102634240_at	Gm31872	predicted gene, 31872	-1.46153	6.16911	1.38755	5.99507	-1.05332	31.9769
102634268_at	LOC102634268	uncharacterized LOC102634268	1.06247	42.041	1.16114	5.99507	1.23367	2.97913
102634269_at	Gm31895	predicted gene, 31895	1.07182	25.0856	1.16277	14.3309	1.24628	2.97913
102634284_at	Gm38462	predicted gene, 38462	1.37823	6.16911	1.02242	41.0315	1.40913	1.13219
102634296_at	LOC102634296	uncharacterized protein CXorf49 homolog	1.32763	6.16911	-1.25638	0.803127	1.05671	27.3308
102634300_at	LOC102634300	uncharacterized LOC102634300	-1.06994	57.704	1.01786	41.0315	-1.05117	34.5868
102634304_at	LOC102634304	uncharacterized LOC102634304	1.03703	54.2028	18.4378	0	19.1206	0
102634309_at	Gm11419	predicted gene 11419	1.10865	25.0856	-1.07033	26.6761	1.03581	16.9924
102634323_at	Gm14320	predicted gene 14320	-1.4297	6.16911	1.36241	5.99507	-1.04938	34.5868
102634333_at	1110002E22Rik	RIKEN cDNA 1110002E22 gene	1.11719	25.0856	1.03716	35.7106	1.1587	16.9924
102634340_at	LOC102634340	uncharacterized LOC102634340	-1.16859	25.0856	1.10751	26.6761	-1.05515	27.3308
102634348_at	LOC102634348	28S ribosomal protein S21, mitochondrial pseudogene	1.01136	54.2028	1.3731	2.18295	1.38869	2.97913
102634389_at	LOC102634389	uncharacterized LOC102634389	-1.20022	25.0856	1.03824	35.7106	-1.15601	27.3308
102634401_at	LOC102634401	uncharacterized LOC102634401	-1.02358	60.7357	1.21781	0.803127	1.18976	1.13219
102634405_at	Gm13133	predicted gene 13133	-1.0323	60.7357	1.26862	2.18295	1.22893	2.97913
102634429_at	LOC102634429	uncharacterized LOC102634429	1.14353	25.0856	-1.16406	14.3309	-1.01795	36.5645
102634439_at	Gm38464	predicted gene, 38464	-1.00227	60.7357	-1.19746	26.6761	-1.20018	31.9769
102634459_at	LOC102634459	uncharacterized LOC102634459	1.26769	12.3562	1.29715	5.99507	1.64439	0.111227
102634462_at	Gm38465	predicted gene, 38465	1.21334	12.3562	-1.38166	2.18295	-1.13873	27.3308
102634512_at	Gm13791	predicted gene 13791	1.06303	42.041	-1.35668	0.308961	-1.27624	0.111227
102634513_at	Gm13982	predicted gene 13982	-1.00372	60.7357	1.06516	26.6761	1.06122	7.52666
102634533_at	LOC102634533	uncharacterized LOC102634533	-1.49078	0.301356	-1.28995	2.18295	-1.92304	0
102634561_at	Gm14377	predicted gene 14377	1.46544	6.16911	1.76771	0.803127	2.59047	0
102634580_at	Gm26519	predicted gene, 26519	-1.24556	12.3562	1.6853	0.130668	1.35304	0.482549
102634608_at	Gm16559	predicted gene 16559	-1.03587	60.0813	1.06752	26.6761	1.03056	27.3308
102634628_at	Gm11418	predicted gene 11418	-1.15358	12.3562	1.18428	2.18295	1.02661	27.3308
102634646_at	Gm12915	predicted gene 12915	1.00467	54.2028	-1.04666	35.7106	-1.04179	34.5868
102634678_at	Haglr	Hoxd antisense growth associated long non-coding RNA	-1.03456	60.0813	-1.10812	14.3309	-1.14642	2.97913
102634680_at	Gm14210	predicted gene 14210	1.18017	12.3562	-1.02658	41.0315	1.14962	7.52666
102634683_at	LOC102634683	uncharacterized LOC102634683	-1.1417	25.0856	-1.5748	0.0451547	-1.79795	0.0148586
102634697_at	Gm15984	predicted gene 15984	-1.13399	42.041	1.08207	26.6761	-1.04798	34.5868
102634708_at	Gm11695	predicted gene 11695	1.22425	6.16911	-1.01684	41.0315	1.20397	1.13219
102634709_at	LOC102634709	40S ribosomal protein S14	1.1035	42.041	1.31214	5.99507	1.44794	0.224685
102634746_at	Gm13201	predicted gene 13201	1.05724	42.041	-1.20159	2.18295	-1.13654	7.52666
102634753_at	Gm12440	predicted gene 12440	1.08237	25.0856	1.10856	14.3309	1.19987	2.97913
102634756_at	Gm32262	predicted gene, 32262	-1.34589	12.3562	1.91622	0.130668	1.42376	0.482549
102634777_at	Gm13266	predicted gene 13266	1.15859	12.3562	1.04267	35.7106	1.20802	1.13219
102634783_at	Gm11228	predicted gene 11228	1.00198	54.2028	1.05201	26.6761	1.05409	27.3308
102634805_at	LOC102634805	60S ribosomal protein L37a-like	1.13862	25.0856	2.19822	0	2.50293	0
102634812_at	LOC102634812	ribosomal protein L39 pseudogene	-1.13284	42.041	-1.07261	26.6761	-1.21509	7.52666
102634827_at	Gm38468	predicted gene, 38468	-1.27548	6.16911	1.45733	0.803127	1.14258	7.52666
102634837_at	Gm13853	predicted gene 13853	-1.02351	60.7357	1.0024	42.8252	-1.02106	36.5645
102634839_at	Gm26666	predicted gene, 26666	-1.07107	54.2028	1.08103	14.3309	1.0093	31.9769
102634841_at	Gm38469	predicted gene, 38469	1.33223	6.16911	-1.24092	5.99507	1.07358	31.9769
102634844_at	Gm16582	predicted gene 16582	1.00572	54.2028	1.14278	5.99507	1.14931	1.13219
102634850_at	Gm32337	predicted gene, 32337	-1.23481	6.16911	1.23478	2.18295	-1.00002	36.5645
102634852_at	LOC102634852	uncharacterized LOC102634852	-1.14286	25.0856	1.14328	2.18295	1.00036	31.9769
102634853_at	Gm13652	predicted gene 13652	1.00655	54.2028	1.15467	14.3309	1.16224	7.52666
102634854_at	LOC102634854	protein transport protein Sec61 subunit gamma pseudogene	1.53741	0.192905	-1.2817	2.18295	1.19952	2.97913
102634887_at	LOC102634887	uncharacterized LOC102634887	-1.04516	60.7357	1.0283	41.0315	-1.0164	36.5645
102634900_at	LOC102634900	uncharacterized LOC102634900	1.03977	42.041	-1.01533	42.8252	1.02407	31.9769
102634913_at	Gm16070	predicted gene 16070	1.07474	42.041	1.39966	0.308961	1.50427	0.0148586
102634924_at	LOC102634924	60S ribosomal protein L39 pseudogene	1.32068	1.50007	-1.21615	2.18295	1.08595	7.52666
102634926_at	Gm12426	predicted gene 12426	1.19953	12.3562	1.18662	14.3309	1.42338	0.482549
102634941_at	Gm29376	predicted gene 29376	1.08459	42.041	-1.41041	0.803127	-1.3004	2.97913
102634949_at	Gm13269	predicted gene 13269	1.25349	1.50007	1.34077	0.130668	1.68064	0
102634967_at	Gm16341	predicted gene 16341	1.34013	0.301356	-1.65931	0.0201689	-1.23817	0.482549
102634968_at	LOC102634968	uncharacterized LOC102634968	-1.01741	60.7357	1.0564	26.6761	1.03833	27.3308
102635008_at	Gm25432	predicted gene, 25432	1.73883	0.104308	-1.96609	0.0201689	-1.1307	27.3308
102635013_at	Gm15825	predicted gene 15825	1.00939	54.2028	-1.09511	14.3309	-1.08492	27.3308
102635043_at	Gm32479	predicted gene, 32479	1.30596	6.16911	1.18891	14.3309	1.55267	0.482549
102635066_at	Gm32497	predicted gene, 32497	1.03846	54.2028	-1.05434	35.7106	-1.01529	36.5645
102635068_at	Gm24392	predicted gene, 24392	1.1645	12.3562	-1.48922	0.130668	-1.27885	0.111227
102635083_at	Gm26685	predicted gene, 26685	1.11217	25.0856	1.07637	26.6761	1.19711	2.97913
102635136_at	Gm26671	predicted gene, 26671	1.0197	54.2028	1.19315	5.99507	1.21666	2.97913
102635143_at	Gm28626	predicted gene 28626	1.01276	54.2028	-1.07417	14.3309	-1.06064	31.9769
102635150_at	Gm38475	predicted gene, 38475	1.1166	25.0856	1.0326	35.7106	1.15301	2.97913
102635154_at	LOC102635154	uncharacterized LOC102635154	-1.55332	0.301356	1.55756	0.130668	1.00273	31.9769
102635191_at	Gm16573	predicted gene 16573	-1.18189	12.3562	-1.09221	14.3309	-1.29087	0.482549
102635192_at	Gm16835	predicted gene, 16835	1.03335	42.041	1.09103	14.3309	1.12741	2.97913
[truncated: 23,431 more rows]
